# Supplementary material for: Measuring the efficiency of health systems in Asia: a data envelopment analysis
Source: PubMed Central journal article supplement — BMJ Open. 2019 Mar 27;9(3):e022155. doi: 10.1136/bmjopen-2018-022155 (PMC6475137; doi:10.1136/bmjopen-2018-022155), 2019-03-27
Supplement: bmjopen-2018-022155.draft_revisions.pdf [file bmjopen-2018-022155.draft_revisions.pdf]

# BMJ Open

BMJ Open is committed to open peer review. As part of this commitment we make the peer review history of every article we publish publicly available.

When an article is published we post the peer reviewers' comments and the authors' responses online. We also post the versions of the paper that were used during peer review. These are the versions that the peer review comments apply to.

The versions of the paper that follow are the versions that were submitted during the peer review process. They are not the versions of record or the final published versions. They should not be cited or distributed as the published version of this manuscript.

BMJ Open is an open access journal and the full, final, typeset and author-corrected version of record of the manuscript is available on our site with no access controls, subscription charges or pay-per-view fees (<http://bmjopen.bmj.com>).

If you have any questions on BMJ Open's open peer review process please email [info.bmjopen@bmj.com](mailto:info.bmjopen@bmj.com)

# BMJ Open

## Measuring the efficiency of health systems in Asia: A data envelopment analysis

|                               |                                                                                                                                                                                                                                                                                                                                                                                                                                                                                                                                                                                                                                                                                                                                                                                                                                                                                                                                                       |
|-------------------------------|-------------------------------------------------------------------------------------------------------------------------------------------------------------------------------------------------------------------------------------------------------------------------------------------------------------------------------------------------------------------------------------------------------------------------------------------------------------------------------------------------------------------------------------------------------------------------------------------------------------------------------------------------------------------------------------------------------------------------------------------------------------------------------------------------------------------------------------------------------------------------------------------------------------------------------------------------------|
| Journal:                      | <i>BMJ Open</i>                                                                                                                                                                                                                                                                                                                                                                                                                                                                                                                                                                                                                                                                                                                                                                                                                                                                                                                                       |
| Manuscript ID                 | bmjopen-2018-022155                                                                                                                                                                                                                                                                                                                                                                                                                                                                                                                                                                                                                                                                                                                                                                                                                                                                                                                                   |
| Article Type:                 | Research                                                                                                                                                                                                                                                                                                                                                                                                                                                                                                                                                                                                                                                                                                                                                                                                                                                                                                                                              |
| Date Submitted by the Author: | 05-Feb-2018                                                                                                                                                                                                                                                                                                                                                                                                                                                                                                                                                                                                                                                                                                                                                                                                                                                                                                                                           |
| Complete List of Authors:     | Ahmed, Sayem; International Centre for Diarrhoeal Disease Research Bangladesh, Health Economics and Financing Research<br>Hasan, Md. Zahid; International Centre for Diarrhoeal Disease Research, Bangladesh, Health Systems and Population Studies Division<br>MacLennan, Mary; London School of Economics and Political Science, Department of Social Policy<br>Dorin, Farzana; International Centre for Diarrhoeal Disease Research Bangladesh, Health Economics and Financing Research<br>Ahmed, Mohammad; International Centre for Diarrhoeal Disease Research Bangladesh<br>Hasan, Md. Mehedi ; University of Queensland Faculty of Humanities and Social Sciences, Institute for Social Science Research<br>Hasan, Shaikh Mehdi ; International Centre for Diarrhoeal Disease Research Bangladesh<br>ISLAM, Mohammad Touhidul; World Health Organization Bangladesh<br>Khan, Jahangir; Liverpool School of Tropical Medicine, Health Economics |
| Keywords:                     | Technical efficiency, Data envelopment analysis, Asian countries, Health systems efficiency                                                                                                                                                                                                                                                                                                                                                                                                                                                                                                                                                                                                                                                                                                                                                                                                                                                           |
|                               |                                                                                                                                                                                                                                                                                                                                                                                                                                                                                                                                                                                                                                                                                                                                                                                                                                                                                                                                                       |

SCHOLARONE™  
Manuscripts

1  
2  
3 **Title.** Measuring the efficiency of health systems in Asia: A data envelopment analysis  
4

5  
6 **Short title.** Measuring the efficiency of health systems in Asia  
7

8 **Authors:** Sayem Ahmed<sup>1,2</sup>; Md. Zahid Hasan<sup>1</sup>; Mary MacLennan<sup>3</sup>; Farzana Dorin<sup>1</sup>; Mohammad  
9 Wahid Ahmed<sup>1</sup>, Md. Mehedi Hasan<sup>4</sup>, Shaikh Mehdi Hasan<sup>1</sup>, Mohammad Touhidul Islam<sup>5</sup>, Jahangir  
10 A. M. Khan<sup>2,6</sup>  
11  
12  
13  
14  
15

16 **Affiliation:** <sup>1</sup>) Health Systems and Population Studies Division, icddr,b, Dhaka, Bangladesh;  
17

18 <sup>2</sup>) Department of Learning, Informatics, Management and Ethics (LIME), Karolinska  
19 Institutet, Stockholm, Sweden  
20  
21

22 <sup>3</sup>) Department of Social Policy, London School of Economics and Political Science, London,  
23 United Kingdom  
24  
25

26 <sup>4</sup>) Institute for Social Science Research, University of Queensland, Queensland, Australia  
27

28 <sup>5</sup>) World Health Organization Bangladesh, Dhaka, Bangladesh  
29

30 <sup>6</sup>) Liverpool School of Tropical Medicine, Liverpool, U.K.  
31  
32  
33  
34  
35

36 **\*Corresponding author**  
37

38 Sayem Ahmed, MHE, MS  
39

40 Postal address: Health Systems and Population Studies Division, icddr,b,  
41 68 Shahid Tajuddin Ahmed Sharani, Mohakhali, Dhaka-1212, Bangladesh.  
42  
43

44 Cell. +8801912522643 Fax +88-02-8811568 E-mail address: [sayemahmed@icddr.org](mailto:sayemahmed@icddr.org)  
45  
46  
47  
48

49 **Word count:** 3331  
50

51 **Keywords:** Technical efficiency, Data envelopment analysis, Asian countries, Health  
52 systems.  
53  
54  
55  
56  
57  
58  
59  
60

## 26 ABSTRACT

27 **Objective:** One of the important objectives of every health systems is to use healthcare resources  
28 efficiently. However, such resources are being wasted in many health systems particularly in the low-  
29 and-middle income countries of Asia. This study aims to estimate the relative technical efficiency of  
30 health systems of Asian countries.

31 **Settings:** The study was conducted based on Asian countries.

32 **Methods:** We applied an output-oriented data envelopment analysis approach to estimate the  
33 technical efficiency of the health systems in Asian countries. As input variables we used per-capita  
34 health expenditure, number of physicians and number of beds per 1,000 people, smoking prevalence  
35 among adult male, and rate of primary-education completion. Output variables were life expectancy at  
36 birth and infant mortality per 1,000 live births. These variables were extracted from the World  
37 Development Indicators (WDI).

38 **Results:** The main findings of the study demonstrate that more than half of the sampled countries  
39 (57%) in the Asia region are technically inefficient with respect to using their healthcare systems  
40 inputs, based on the efficiency frontier generated from the countries studied. We found three high  
41 income-countries (Japan, Singapore, and Oman) and eight lower-middle-income countries (Sri Lanka,  
42 Pakistan, Timor-Leste, Cambodia, India, Syria, Yemen and Bangladesh) were efficiently using their  
43 healthcare resources. In Asia, through efficiency gain, the high-, upper middle-, lower middle-, and  
44 low-income countries can improve output indicators of health systems by 2%, 5%, 2% and 7%  
45 respectively using the same amount of inputs.

46 **Conclusion:** The results of this analysis showed inefficiency of the health systems in most of the  
47 Asian countries and imply that many countries may improve their health systems efficiency using the  
48 current level of resources. The identified inefficient countries could pay attention to benchmarking  
49 their health systems within their regional or another type of comparative group.

### 50 **Strengths and limitations of this study:**

- 51 • The study estimates the technical efficiency of the health systems in Asia using data  
52 envelopment analysis
- 53 • We analyzed efficiency of the highest number of health systems in Asia for the first time

- 54 • We extracted health systems level indicators from the widely used world development  
55 indicators database
- 56 • Some environmental factors of health systems were not included in the analysis due to the  
57 unavailability of data

## 58 **BACKGROUND**

59 In Asia, there are approximately 4.4 billion people spread across highly diverse countries, from  
60 economic powerhouses like China and Singapore to poorer economies such as Laos, Cambodia, and  
61 Myanmar (1). The continent is often cited as the fastest-growing and most dynamic region in the  
62 world. Over the past number of years, Asian societies have also made impressive progress in ensuring  
63 better healthcare services, especially those targeted towards improving maternal and infant health and  
64 increasing life expectancy (2). However, whether economic gains have translated to efficient health  
65 systems across the region is still not well studied.

66 It is important that the healthcare resources in Asia are used efficiently. Overall, government spending  
67 on healthcare is low compared to total health expenditure and furthermore it is often not focused on  
68 those who need it most. For example, in the South Asia region governments spend 31% of total health  
69 expenditure, which is more than one percent of gross domestic product (3,4). For many countries in  
70 the Asia region, personal health expenses or out-of-pocket payments are a major cause of poverty  
71 (1,5). From a study of 11 Asian countries, it was found that high levels of out-of-pocket healthcare  
72 spending have pushed 78 million people into poverty annually (6). Aging populations and non-  
73 communicable diseases that are often preventable but expensive to treat (e.g. diabetes and cancers  
74 linked to tobacco) impose and will continue to impose heavy costs on households and public health  
75 budgets. Moreover, a major challenge for Asian countries is the control and prevention of different  
76 communicable diseases (e.g. HIV/AIDS, tuberculosis, and polio) due to the movement of people  
77 across borders and the exchange of goods (7).

78 The World Health Organization (WHO) has estimated that about 20% to 40% of total healthcare  
79 resources are being wasted per year among the WHO member countries due to inefficiency. Further,  
80 this rate is higher in low-and-middle income countries (LMICs) (8). In Asia, the variation in

1  
2  
3 81 efficiency across income settings can perhaps lead to lessons learned in addressing it. In order to  
4  
5 82 address inefficiency, Asia's health systems can look toward different dimensions of performance such  
6  
7 83 as their effectiveness, efficiency, access, equity, and quality(9). A great deal of practitioner and  
8  
9 84 academic literature has analyzed the relationship between the efficient production of health services  
10  
11 85 and universal health coverage (UHC) as well as the widespread importance of measuring overall  
12  
13 86 health system performance (8,10).

14  
15 87 Assessing the efficiency of healthcare systems is a difficult process as analyses often encounter  
16  
17 88 methodological problems, particularly due to the need for appropriate and valid outcome indicators  
18  
19 89 (11). Despite the empirical difficulties in applying efficiency concepts to health systems, inefficiency  
20  
21 90 can be measured on both micro and macro level (12). Measuring health system efficiency at a macro-  
22  
23 91 level is particularly important in order to understand health system performance across the globe and  
24  
25 92 take required action (10,13).

26  
27 93 In an international study of efficiency in 170 countries, it was observed that Asian countries were  
28  
29 94 comparatively in the middle with respect to health system efficiency scores (14). Although this is  
30  
31 95 perhaps encouraging, a few studies have analyzed health systems efficiency across Asian countries  
32  
33 96 specifically (15). Asian countries are not homogenous in terms of area, population, and economic  
34  
35 97 conditions, however, they have public health functions and a number of their health system outcomes  
36  
37 98 in common (16). Many of the countries share similar health systems problems, including inadequate  
38  
39 99 resources for healthcare and a high burden of diseases due to the geographical contiguity, disease  
40  
41 100 patterns, and social conditions. Understanding health systems efficiency in different Asian countries  
42  
43 101 could promote shared learning and highlight key areas of best practice, as well as areas where  
44  
45 102 improvement is needed.

46  
47 103 This paper evaluates the technical efficiency of the healthcare systems of selected Asian countries  
48  
49 104 using data from the World Development Indicators.

## 50 105 **METHODS**

51  
52 106 Data envelopment analysis (DEA) was used for estimating technical and scale efficiency of the health  
53  
54 107 systems of Asian countries.  
55  
56  
57  
58  
59  
60

**108 Input and output variables**

109 A main assumption of the DEA model used in our analysis was that in Asian countries, the selected  
110 health outcomes were dependent on the inputs of healthcare resources. We selected input variables  
111 representing access to medical care and the service of physicians as well as per-capita health  
112 expenditure. Following similar studies, number of physicians per 1,000 population and number of  
113 inpatient beds per 1,000 population were selected as inputs representing access to healthcare (17,18).  
114 Noting that in addition to health care, health status of individuals is determined by the lifestyle and  
115 behaviors, therefore we also included two environmental factors as input variables, namely smoking  
116 prevalence among adult male and primary education completion rate of relevant age group (19). The  
117 adverse health effect of smoking consequently affects health outcomes (20,21). Education is also  
118 found to one of the important factors in determining individual health status. Higher educational  
119 attainment has an association with income which secures healthy living environment and access to  
120 healthcare (22). Like similar studies in different context, the health outcomes of this study were life  
121 expectancy at birth and infant mortality (per 1,000 live births) (23–25). Declines in infant mortality  
122 and increase in life expectancy denotes the improvement in the health status or health outcomes of a  
123 country. We used the inverse of infant mortality in the DEA model as the model assumes that inputs  
124 and outputs are isotonic (i.e. increased input reduces efficiency as well as increased output increases  
125 efficiency) (26). Without this correction, a higher infant mortality figure would have been said to  
126 incorrectly contribute to a greater output of health systems.

**127 Data**

128 According to the list of United Nation Statistics Division, there are 50 Asian countries and territories.  
129 Among these , 46 were used for this study (27). Four countries and territories (Hong Kong, North  
130 Korea, Macao, and West bank and Gaza) were excluded due to missing data of selected variables in  
131 the WDI database (4). However, selected variables for the study countries were not reported in WDI  
132 for every year. This problem is unavoidable in studies based on WDI data (17,28,29). Earlier studies  
133 adapted two approaches to deal with such problem. Firstly, used a value from a slightly earlier year as  
134 in Anderson et al. (28) and secondly, used a smaller number of countries in the model as in Fare et  
135 al.(29) and Grubaugh and Santerre (17). Given the importance of including as many countries as

1  
2  
3 136 possible to study technical efficiency using data envelope analysis, we opted for the first approach.  
4  
5 137 We captured most of the variables from the World Development Indicators-2014 (WDI). However, to  
6  
7 138 avoid missing variable we used slightly earlier WDI statistics. Gathering data from a single source  
8  
9 139 ensures the accuracy and comparability of the data which are important requirements for DEA  
10  
11 140 models.

#### 13 141 **Data envelopment analysis**

14 142 DEA is one of the most widely used methods to assess the technical efficiency and scale efficiency of  
15  
16 143 a set of decision-making units (DMUs) (In the case of this analysis, DMUs are the 46 different Asian  
17  
18 144 countries). DEA is a non-parametric method which identifies an efficiency frontier on which only the  
19  
20 145 efficient DMUs are placed, by using linear programming techniques. One type of DEA model,  
21  
22 146 developed by Charnes, Cooper, and Rhodes (CCR), assumes that production has constant returns to  
23  
24 147 scale (CRS) meaning any change in the input will result in a proportionate change in the output (30).  
25  
26 148 Another model proposed by Banker, Charnes, and Cooper (BCC), assumes that production has  
27  
28 149 variable returns to scale (VRS) implying an increase in the input will result in either an increase or a  
29  
30 150 decrease in the output. The latter methodology is particularly useful for this study since it aims to  
31  
32 151 measure the efficiency related to organizational units (i.e. the health systems of the different  
33  
34 152 countries), which use numerous resources to produce multiple outputs and accommodate a more  
35  
36 153 flexible assumption of VRS (14,31). This is more realistic and reflective of changes in the real world  
37  
38 154 (32).

39  
40  
41 155 Scale efficiency scores provide information on the optimality of the DMUs size. If a healthcare  
42  
43 156 system is scale efficient any modifications to its size will result in less efficient production. Scale  
44  
45 157 efficiency is measured as the ratio of CRS technical efficiency scores and VRS technical efficiency  
46  
47 158 scores (33).

48  
49 159 When it comes to DEA studies comparing countries, both the input and output oriented models have  
50  
51 160 been adopted for this type of analysis. An output-oriented DEA model aims to maximize the outputs  
52  
53 161 obtained by the DMUs, while keeping the inputs constant. The input-oriented models focus on  
54  
55 162 minimizing the inputs used for processing given amounts of outputs. Several studies have been carried  
56  
57  
58  
59  
60



163 out using DEA to assess the efficiency of healthcare systems using different methods in both high-  
 164 income and low-income countries (34–37).

165 In our analysis, we used the output-oriented BCC and CCR model to estimate both CRS and VRS  
 166 technical efficiency scores.

### 167 **Output oriented model**

168 The output-oriented technical efficiency model focuses on increasing output without changing the  
 169 quantity of inputs used. The objective of the model for solving each particular DMU (country) is to  
 170 maximize the efficiency score (denoted by  $\phi$ ) meaning the amount by which all outputs can be  
 171 improved for each country under consideration while holding input constant.

172 The output-oriented DEA model is specified as follows.

$$\text{Max } \phi = \sum O_r Y_{rj_0} + O_0$$

173 Subject to constraints

$$\sum_{i=1}^m V_i + X_{ij_0} = 1$$

$$\sum_{r=1}^s O_r + Y_{rj} - \sum V_r X_{ij} + O_0 \leq 0, \quad j = 1, \dots, n$$

174  $O_r, V_i \geq 0$

175  $O_0 > 0, \text{ or } O_0 = 0 \text{ or } O_0 < 0$

176 Where,

177  $Y_{ij}$  = amount of output  $r$  from country  $j$ ,

178  $X_{ij}$  = amount of input  $i$  to country  $j$ ,

179  $O_r$  = weight given to output  $r$ ,

180  $V_i$  = weight given to input  $i$ ,

181  $n$  = number of hospitals,

182  $s$  = number of outputs,

183  $m$  = number of inputs.

184  $O_0 > 0$  defines increasing returns to scale,  $O_0 = 0$  defines constant returns to scale, and  $O_0 < 0$  defines  
 185 decreasing returns to scale.

186 The technical efficiency scores is defined by  $\phi$  and it ranges between 0.00 and 1.00, If it is equal to  
 187 1.00, then the production from the DMU is efficient; while if it is less than 1.00, the DMU is  
 188 inefficient.

189

190

## 191 RESULTS

192 The descriptive statistics of the selected input, output and environmental variables are shown in Table  
 193 1. The health expenditure per-capita ranges from a minimum of 88.1 USD (Bangladesh) to a  
 194 maximum of 4,047.0 USD (Singapore) with a mean, median and standard deviation of 1,041.5, 613.7  
 195 and 1,048.4 respectively. The number of physician per 1,000 people ranges from a minimum of 0.1 at  
 196 Timor-Leste to maximum 4.8 at Georgia. However, the number of inpatient beds per 1,000 people is  
 197 minimum at Iran (0.1) and maximum at Japan (13.7). The average smoking prevalence of adult male  
 198 people among the studied countries is 42.2 and average primary education completion rate is 96.5% of  
 199 the relevant age group.

200 Table 1. Descriptive statistics of input and output variables

| Characteristics/ description                             | Mean    | Median | SD*     | Minimum | Maximum |
|----------------------------------------------------------|---------|--------|---------|---------|---------|
| <b>Input variables</b>                                   |         |        |         |         |         |
| <i>Health systems inputs</i>                             |         |        |         |         |         |
| Health expenditure per capita, PPP                       | 1,041.5 | 613.7  | 1,048.4 | 88.1    | 4,047.0 |
| Physicians (per 1,000 people)                            | 1.6     | 1.6    | 1.1     | 0.1     | 4.8     |
| Hospital beds (per 1,000 people)                         | 2.9     | 2.1    | 2.7     | 0.1     | 13.7    |
| <i>Environmental factors</i>                             |         |        |         |         |         |
| Smoking prevalence, males (% of adults)                  | 42.2    | 42.2   | 10.5    | 18.9    | 71.8    |
| Primary completion rate, total (% of relevant age group) | 96.5    | 97.9   | 11.4    | 66.7    | 116.5   |
| <b>Output variables</b>                                  |         |        |         |         |         |
| Life expectancy at birth (years)                         | 72.9    | 74.2   | 5.4     | 60.4    | 83.6    |
| Infant mortality (per 1,000 live births)                 | 20.9    | 13.7   | 16.8    | 2.1     | 68.1    |

201 \*Standard deviation

202 Among the countries analyzed, life expectancy at birth was a minimum of 60.4 years in Afghanistan  
 203 and a maximum of 83.6 years in Japan. The infant mortality rate ranged from 2.1 deaths per 1,000 live  
 204 births in Japan to 68.1 deaths per 1,000 live births in Afghanistan. On average, there were 21.1 deaths  
 205 per 1,000 live births in the studied countries. The scatter matrix of the input and output variables

1  
2  
3 206 shows that inputs, for instance, per-capita healthcare expenditure was associated with improved health  
4  
5 207 outcomes (e.g. life expectancy and infant mortality) (Figure1). The higher prevalence of smoking has  
6  
7 208 a negative impact on life expectancy. However, life expectancy and infant mortality were inversely  
8  
9 209 associated.

10  
11 210

12  
13 211 (Figure 1. will be inserted here)

14  
15 212

16  
17 213 The mean CRS and VRS technical efficiency scores were 0.925 and 0.969 respectively (Table 2).  
18  
19 214 Whereas, the mean scale efficiency score was 0.954. In terms of both CRS and VRS technical  
20  
21 215 efficiency, Kazakhstan and Afghanistan have the lowest score of 0.766 and 0.850 respectively.

22  
23 216 Out of 460 countries studied, 20 (43%) and 16 (35%) countries showed the maximum level of  
24  
25 217 (efficiency score 1.00) VRS and CRS technical efficiency respectively. In total, 17 (37%) countries  
26  
27 218 showed scale efficiency of 1.00 implying these countries created the best practice frontier in this  
28  
29 219 study, based on their input and output combinations. We found that equal number of countries  
30  
31 220 observed increasing returns to scale and constant returns to scale (17 countries), followed by  
32  
33 221 decreasing returns to scale (12 countries).

34  
35  
36 222 (Table 2. will be inserted here)

37  
38 223

39  
40 224 Among the inefficient countries, 26 (57%), 30 (65%), and 29 (63%) countries had VRS technical  
41  
42 225 efficiency, CRS technical efficiency and scale efficiency score respectively less than one (Figure 2).

43  
44 226 (Figure 2. will be inserted here)

45  
46 227

47  
48 228 In Table 3, mean efficiency scores are presented by the income categories of the countries. The  
49  
50 229 highest mean CRS technical efficiency were observed for LMICs (0.95), followed by high-income  
51  
52 230 (0.94), upper-middle-income (0.88) and low-income countries (0.92). The high-income countries and  
53  
54 231 LMICs had the highest average VRS technical efficiency (0.98), followed by upper-middle-income  
55  
56 232 countries (0.95) and low-income countries (0.93). Maintaining the existing input levels, the high,

233 upper middle-, lower middle-, and low-income countries could improve their outcome by 2%, 5%, 2%  
234 and 7% respectively.

235

236

237 Table 3. Mean efficiency scores according to income level of Asian countries

| Income groups       | CRS technical efficiency | VRS technical efficiency | Percentage of output can be improved in CRS technical efficiency |
|---------------------|--------------------------|--------------------------|------------------------------------------------------------------|
| Low-income          | 0.92                     | 0.93                     | 7%                                                               |
| Lower middle-income | 0.95                     | 0.98                     | 2%                                                               |
| Upper middle-income | 0.88                     | 0.95                     | 5%                                                               |
| High -income        | 0.94                     | 0.98                     | 2%                                                               |

238

## 239 DISCUSSION

240 The main findings of this paper demonstrated that more than half (57%) of the studied countries in the  
241 Asia region are technically inefficient with respect to using the inputs in their healthcare systems. The  
242 study findings showed that the most efficient countries belonged to the lower-middle-income group  
243 (Sri Lanka, Pakistan, Timor-Leste, Cambodia, India, Syria, Yemen and Bangladesh). Additionally,  
244 three high-income countries (Japan, Singapore, and Oman), one low-income country (Nepal), and  
245 three upper-middle income countries (Lebanon, Iran, Iraq, and Thailand) in Asia were also efficient  
246 (Technical efficiency =1.00). Among the 46 countries studied, 17 countries (Bangladesh, Sri Lanka,  
247 Japan, Oman, Thailand, Iraq, Timor-Leste, Yemen, Singapore, India, Iran, Lebanon, Pakistan, Nepal,  
248 Syrian, Cambodia, and Cyprus) showed constant returns to scale efficiency, indicating that they were  
249 operating at their most efficient level. Another 17 countries (Malaysia, Bhutan, Myanmar, Tajikistan,  
250 Mongolia, Philippines, Indonesia, Uzbekistan, Saudi Arabia, Afghanistan, Kyrgyz Republic,  
251 Kazakhstan, Lao PDR, Azerbaijan, Kuwait, and Brunei Darussalam) demonstrated increasing returns  
252 to scale suggesting that they should increase inputs into their health systems to be more scale  
253 efficient. The remaining 12 countries showed decreasing returns to scale, meaning that their health  
254 systems has more inputs compared to their operating size. Therefore, they should scale down if they

1  
2  
3 255 were to become scale efficient given the existing system. The average scale efficiency score was 0.95  
4  
5 256 which indicates that there was little difference between CRS and VRS production of healthcare  
6  
7 257 services among the countries studied.

8  
9 258 An important policy implication of this study is that the technically inefficient low-income countries  
10  
11 259 on average can improve their health systems outcome by 7% while maintaining constant levels of per-  
12  
13 260 capita health expenditure and levels of access to hospital beds and availability of physicians. It was  
14  
15 261 observed that the efficiency scores increased from the low-income country groups to high-income  
16  
17 262 country groups, with a few exceptions. An international study found a similar conclusion that health  
18  
19 263 systems performance is most efficient in the developed countries, according to simple efficiency  
20  
21 264 scores (38).

22  
23  
24 265 The overall healthcare efficiency in different countries varied considerably (39,40). Among the  
25  
26 266 LMICs studied, eight countries demonstrated to have the most efficient health systems. These  
27  
28 267 countries have both technical and scale efficient health systems, like the high-income countries  
29  
30 268 (Japan, Singapore, and Oman). A possible reason for the high efficiency of these LMICs could be a  
31  
32 269 focus on infant mortality and child health as prioritized in past Millennium Development Goals and in  
33  
34 270 current Sustainable Development Goals agendas, which relates to the output variables used in this  
35  
36 271 study.

37  
38 272 The DEA showed that many of the LMICs produce good health at low cost and therefore make good  
39  
40 273 use of their inputs (41). This result implies that it is possible for countries to have a high-efficiency  
41  
42 274 score with poor health outcomes because of their low expenditure on resources. In other words, given  
43  
44 275 their moderate consumption of inputs and challenging social environments, these countries can  
45  
46 276 achieve good health outcomes, relative to the other countries. Similar findings were observed for  
47  
48 277 Mexico and Turkey relative to other countries in a study of the OECD countries (25). It should be  
49  
50 278 noted that this study only used per-capita health expenditure and two health systems indicators  
51  
52 279 (number of physicians and beds per 1,000 people) given the data limitation, and there are other factors  
53  
54 280 that influence health outcomes as well. For example differences in life expectancy and infant  
55  
56 281 mortality between populations can be due to lifestyles, preferences (42,43,20) social class,

1  
2  
3 282 occupation (44) and environmental factors (45,46). On a more macroscopic level, the results could  
4  
5 283 also be impacted by a variety of contextual factors among countries such as different political  
6  
7 284 institutions, economic landscapes, health-seeking behaviour patterns and burden of diseases among  
8  
9 285 other things. However, in this study, we accommodated two available social and lifestyle factors  
10  
11 286 namely primary completion rate of relevant age group and smoking prevalence among the adult male  
12  
13 287 population to take into consideration some of this variation.

14  
15 288 A limitation of DEA methodology is that it works in a deterministic way, meaning that the results  
16  
17 289 entirely depend on the numeric values in the dataset. As the DEA approach compares DMUs, the  
18  
19 290 number and nature of DMUs in the data set can noticeably change the results. For example, if a more  
20  
21 291 efficient country is added to the dataset, it would move the frontier, causing some of the efficiency  
22  
23 292 scores of other countries to fall. This is a key aspect of the methodology used.

24  
25 293 Additionally, input and output variable selection were influenced by data availability because the  
26  
27 294 WDI dataset contains many variables with missing values and DEA strictly requires a complete data  
28  
29 295 set. Additional input and output variables were not used in this analysis because of missing data and a  
30  
31 296 primary aim was to include the highest number of countries as possible in the analysis. Additionally,  
32  
33 297 it is important to note that the use of a different set of variables might have generated different  
34  
35 298 conclusions. In the future, if additional data become available for a larger number of countries of the  
36  
37 299 region, the number of variables analyzed could be increased to include an understanding with a  
38  
39 300 greater degree of complexity in health system efficiency.

40  
41  
42 301 Another data limitation is the comparability of health expenditures among the Asian countries. While  
43  
44 302 recognizing that it is not possible to solve the inherent issues, we made an attempt to minimize it.  
45  
46 303 Since the actual amount of healthcare expenditure across different countries is not comparable due to  
47  
48 304 the difference in purchasing power parity across countries, we used health expenditures as constant of  
49  
50 305 2011 in PPP as an input in the health production model (25).

## 51 52 53 306 **CONCLUSIONS**

54  
55  
56  
57  
58  
59  
60

1  
2  
3 307 This study provides an empirical picture of the technical efficiency of the healthcare systems of 46  
4  
5 308 Asian countries. It found that inefficiency exists in the healthcare systems of most of the countries  
6  
7 309 studied, however, the results point to three high-income and eight lower-middle-income countries  
8  
9 310 which efficiently used the inputs in their healthcare systems. The interpretation of the inefficient  
10  
11 311 countries identified through this study is that they can improve health outcomes using the current level  
12  
13 312 of per-capita health expenditure and the number of physicians and beds per 1,000 people. These  
14  
15 313 countries could use these results to direct their attention to benchmarking their health systems within  
16  
17 314 their regional or another comparative group in order to understand their health system performance in  
18  
19 315 a more detailed way. This study addresses the need to understand issues of efficiency, as well as  
20  
21 316 potentially identify good examples of countries which efficiently allocate and use resources to make  
22  
23 317 their healthcare systems more technically efficient. It narrows a gap in the literature as there are few  
24  
25 318 countries studying healthcare efficiency in Asia and none looking comparatively in this manner.

### 319 **Acknowledgement**

320 icddr,b is thankful to the Governments of Bangladesh, Canada, Sweden and the UK for providing  
321 core/unrestricted support. The authors would like to thank The World Bank for providing open access  
322 to the World Development Indicators database.

### 323 **Contributors**

324 SA, MZH and MM contributed to conceptualizing the research idea, study design, literature search,  
325 data extraction and analysis, data interpretation, and writing the manuscript. MWA FD, SMH, MMH,  
326 MTI and JAMK contributed to writing, reviewing and revising the manuscript. All authors read and  
327 approved the final manuscript

### 328 **Funding**

329 There are no funders to report for this submission

### 330 **Competing interest**

331 None declared.

### 332 **Data sharing statement**

333 The data were extracted from the world development indicators which is available online.



334 **REFERENCES**

- 335 1. United Nations(a). *The World Population Prospects: 2015 Revision*. Vol. 1, Population  
336 Division. New York; 2013.
- 337 2. Asandului L, Roman M, Fatulescu P. The Efficiency of Healthcare Systems in Europe: A Data  
338 Envelopment Analysis Approach. *Procedia Econ Financ*. 2014;10(14):261–8.
- 339 3. Vargas V, Begum T, Ahmed S, Smith O. *Bangladesh – Fiscal space for health : Toward the  
340 Fiscal Space for Health in Bangladesh*. Washington D.C.; 2016.
- 341 4. The World Bank. *World Development Indicators* [Internet]. Washington, DC: The World  
342 Bank; 2017 [cited 2017 Oct 5]. Available from:  
343 <http://databank.worldbank.org/data/reports.aspx?source=world-development-indicators>
- 344 5. Jacobs D. Low public expenditures on social welfare : do East Asian countries have a secret ?  
345 *2000;9(1990):2–16*.
- 346 6. van Doorslaer E, O'Donnell O, Rannan-Eliya RP, Somanathan A, Adhikari SR, Garg CC, et  
347 al. Effect of payments for health care on poverty estimates in 11 countries in Asia: an analysis  
348 of household survey data. *Lancet*. 2006;368(9544):1357–64.
- 349 7. WHO. *Inter-country Cooperation : Cross-border Control of Priority Communicable Diseases*.  
350 New Delhi; 2004.
- 351 8. Chisholm D, Evans DB. *Improving health system efficiency as a means of moving towards  
352 universal coverage*. World Health Organization. Geneva; 2010.
- 353 9. Schwartz WB, Mendelson DN. Eliminating waste and inefficiency can do little to contain  
354 costs. *Health Aff*. 1994;13(1):224–38.
- 355 10. Smith PC. Measuring health system performance. *Eur J Heal Econ*. 2002;3(3):145–8.
- 356 11. European Commission's DG for Employment SA& I. *Employment, Social Affairs &  
357 Inclusion - European Commission* [Internet]. 2017. Available from:  
358 <http://ec.europa.eu/social/home.jsp?langId=en>
- 359 12. João Medeiros and Christoph Schwierz. *Efficiency estimates of health care systems in the EU*.  
360 Vol. 3187. 2015.
- 361 13. Papanicolas I, Smith PC. *Health System Performance Comparison: An Agenda for Policy,  
362 Information and Research*. 1st ed. European Observatory on Health Systems and Policies. New  
363 York: Open University Press; 2013. 1-417 p.
- 364 14. Kim Y, Kang M. *The Measurement of Health Care System Efficiency : Cross-country  
365 Comparison by Geographical Region*. 2014;29(1):21–44.
- 366 15. Hussey PS, De Vries H, Romley J, Wang MC, Chen SS, Shekelle PG, et al. A systematic  
367 review of health care efficiency measures: Health care efficiency. *Health Serv Res*.  
368 2009;44(3):784–805.
- 369 16. WHO. *Health in Asia and the Pacific*. Omi S, Plianbangchang S, editors. India: World Health  
370 Organization; 2008. 561 p.
- 371 17. Grubaugh SG, Santerre RE. *Comparing the Performance of Health Care Systems: An  
372 Alternative Approach*. *South Econ J* [Internet]. 1994;60(4):1030–42. Available from:  
373 <http://search.ebscohost.com/login.aspx?direct=true&db=bth&AN=9406224388&site=ehost-live>  
374
- 375 18. Newhouse JP, Friedlander LJ. The relationship between medical resources and measures of  
376 health: some additional evidence. *J Hum Resour*. 1980;15(2):200–18.
- 377 19. Starfield B. *Health Services Research: A Working Model*. *N Engl J Med* [Internet]. 1973 Jul  
378 19;289(3):132–6. Available from: <http://dx.doi.org/10.1056/NEJM197307192890305>



- 1  
2  
3 379 20. Johansson SE, Sundquist J. Change in lifestyle factors and their influence on health status and  
4 380 all-cause mortality. *Int J Epidemiol*. 1999;28(Cvd):1073–80.
- 5 381 21. Afonso A, St. Aubyn M. Assessing health efficiency across countries with a two-step and  
6 382 bootstrap analysis. *Appl Econ Lett*. 2011;18(13–15):1427–30.
- 7 383 22. Or Z. Determinants of health outcomes in industrialised countries: A pooled, cross-country,  
8 384 time-series analysis. Vol. 30, *OECD Economic Studies*. 2000. 53-77 p.
- 9 385 23. Kirigia JM, Sambo LG, Renner A, Alemu W, Seasa S, Bah Y. Technical efficiency of primary  
10 386 health units in Kailahun and Kenema districts of Sierra Leone. *Int Arch Med*. 2011;4(1):15.
- 11 387 24. Wranik D. Healthcare policy tools as determinants of health-system efficiency: evidence from  
12 388 the OECD. *Heal Econ Policy Law*. 2012;7(2):197–226.
- 13 389 25. Retzlaff-Roberts D, Chang CF, Rubin RM. Technical efficiency in the use of health care  
14 390 resources: A comparison of OECD countries. *Health Policy (New York)*. 2004;69(1):55–72.
- 15 391 26. Spinks J, Hollingsworth B. Cross-country comparisons of technical efficiency of health  
16 392 production: a demonstration of pitfalls. *Appl Econ*. 2009;41(4):417–27.
- 17 393 27. United Nation. United Nations Statistics Division- Standard Country and Area Codes  
18 394 Classifications [Internet]. United Nation. 2016 [cited 2016 Dec 12]. Available from:  
19 395 <https://unstats.un.org/unsd/methodology/m49/>
- 20 396 28. Anderson GF, Hurst J, Hussey PS, Jee-Hughes M. Health spending and outcomes: trends in  
21 397 OECD countries, 1960-1998. *Health Aff (Millwood)*. 2000;19(3):150–7.
- 22 398 29. Fare R, Grosskopf S, Lindgren B, Poullier JP. Productivity growth in health-care delivery.  
23 399 *Med Care*. 1997 Apr;35(4):354–66.
- 24 400 30. Charnes A, Cooper WW, Rhodes E. Measuring the efficiency of decision making units. *Eur J*  
25 401 *Oper Res*. 1978;2(6):429–44.
- 26 402 31. Banker RD, Charnes A, Cooper WW. Some Models for Estimating Technical and Scale  
27 403 Inefficiencies in Data Envelopment Analysis. *Manage Sci*. 1984 Sep;30(9):1078–92.
- 28 404 32. Cheng Z, Tao H, Cai M, Lin H, Lin X, Shu Q, et al. Technical efficiency and productivity of  
29 405 Chinese county hospitals: an exploratory study in Henan province, China. *BMJ Open*.  
30 406 2015;5(9):e007267.
- 31 407 33. Cooper W, Seiford L, Tone K. Data envelopment analysis a comprehensive text with models,  
32 408 applications, references and Dea-Solver software. New York: Springer; 2007.
- 33 409 34. Masiye F. Investigating health system performance: An application of data envelopment  
34 410 analysis to Zambian hospitals. *BMC Health Serv Res [Internet]*. 2007;7(1):58. Available from:  
35 411 <http://bmchealthservres.biomedcentral.com/articles/10.1186/1472-6963-7-58>
- 36 412 35. Kirigia JM, Emrouznejad A, Gama Vaz R, Bastiene H, Padayachy J. A comparative  
37 413 assessment of performance and productivity of health centres in Seychelles. *Int J Product*  
38 414 *Perform Manag*. 2007;57(1):72–92.
- 39 415 36. Jat TR, Sebastian MS. Technical efficiency of public district hospitals in Madhya Pradesh,  
40 416 India: a data envelopment analysis. *Glob Health Action*. 2013 Jan;6(25):21742.
- 41 417 37. Osei D, d’Almeida S, George MO, Kirigia JM, Mensah AO, Kainyu LH. Technical efficiency  
42 418 of public district hospitals and health centres in Ghana: a pilot study. *Cost Eff Resour Alloc*.  
43 419 2005;3:9.
- 44 420 38. Grosskopf S, Self S, Zaim O. Estimating the efficiency of the system of healthcare financing  
45 421 in achieving better health. *Appl Econ [Internet]*. 2006;38(13):1477–88. Available from:  
46 422 <http://www.tandfonline.com/doi/abs/10.1080/00036840500424798>
- 47 423 39. European Union. Comparative efficiency of health systems , corrected for selected lifestyle  
48 424 factors Final report. European Commission. 2014.
- 49 425 40. Joumard I, André C, Nicq C. Health care systems: Efficiency and institutions. 2010;1–132.

- 1  
2  
3 426 41. Balabanova D, Mills A, Conteh L, Akkazieva B, Banteyerga H, Dash U, et al. Good health at  
4 427 low cost 25 years on: Lessons for the future of health systems strengthening. *Lancet*.  
5 428 2013;381(9883):2118–33.
- 6 429 42. Colditz GA, Atwood KA, Emmons K, Monson RR, Willett WC, Trichopoulos D, et al.  
7 430 Harvard report on cancer prevention volume 4: Harvard Cancer Risk Index. *Cancer Causes*  
8 431 *Control*. 2000;11(6):477–88.
- 9 432 43. Laaksonen M, McAlister AL, Laatikainen T, Drygas W, Morava E, Nüssel E, et al. Do health  
10 433 behaviour and psychosocial risk factors explain the European East-Westgap in health status?  
11 434 *Eur J Public Health*. 2001;11(1):65–73.
- 12 435 44. Hart CL, Smith GD, Blane D. Inequalities in mortality by social class measured at 3 stages of  
13 436 the lifecourse. *Am J Public Health*. 1998;88(3):471–4.
- 14 437 45. Cohen DA, Mason K, Bedimo A, Scribner R, Basolo V, Farley TA. Neighborhood physical  
15 438 conditions and health. *Am J Public Health*. 2003;93(3):467–71.
- 16 439 46. Jerrett M, Eyles J, Cole D. Socioeconomic and environmental covariates of premature  
17 440 mortality in Ontario. *Soc Sci Med*. 1998;47(1):33–49.
- 18  
19  
20 441

21  
22 442 Table 2. Technical and scale efficiency scores of Asian countries

| Country Name           | CRS Technical efficiency | VRS Technical efficiency | Scale efficiency | Returns to scale |
|------------------------|--------------------------|--------------------------|------------------|------------------|
| Afghanistan            | 0.836                    | 0.850                    | 0.984            | 1                |
| Armenia                | 0.886                    | 0.981                    | 0.904            | -1               |
| Azerbaijan             | 0.786                    | 0.889                    | 0.884            | 1                |
| Bahrain                | 0.930                    | 0.991                    | 0.938            | -1               |
| Bangladesh             | 1.000                    | 1.000                    | 1.000            | 0                |
| Bhutan                 | 0.950                    | 0.968                    | 0.981            | 1                |
| Brunei Darussalam      | 0.962                    | 0.987                    | 0.974            | 1                |
| Cambodia               | 1.000                    | 1.000                    | 1.000            | 0                |
| China                  | 0.869                    | 0.967                    | 0.898            | -1               |
| Cyprus                 | 0.994                    | 0.994                    | 1.000            | 0                |
| Georgia                | 0.797                    | 0.959                    | 0.831            | -1               |
| India                  | 1.000                    | 1.000                    | 1.000            | 0                |
| Indonesia              | 0.931                    | 0.976                    | 0.954            | 1                |
| Iran, Islamic Republic | 1.000                    | 1.000                    | 1.000            | 0                |
| Iraq                   | 1.000                    | 1.000                    | 1.000            | 0                |
| Israel                 | 0.928                    | 1.000                    | 0.928            | -1               |
| Japan                  | 1.000                    | 1.000                    | 1.000            | 0                |
| Jordan                 | 0.858                    | 0.948                    | 0.905            | -1               |
| Kazakhstan             | 0.766                    | 0.899                    | 0.852            | 1                |
| Korea, Republic        | 0.962                    | 0.999                    | 0.963            | -1               |
| Kuwait                 | 0.819                    | 0.918                    | 0.891            | 1                |
| Kyrgyz Republic        | 0.849                    | 0.945                    | 0.898            | 1                |
| Lao PDR                | 0.983                    | 1.000                    | 0.983            | 1                |
| Lebanon                | 1.000                    | 1.000                    | 1.000            | 0                |
| Malaysia               | 0.857                    | 0.953                    | 0.899            | 1                |

|    |  |  |  |  |  |
|----|--|--|--|--|--|
| 1  |  |  |  |  |  |
| 2  |  |  |  |  |  |
| 3  |  |  |  |  |  |
| 4  |  |  |  |  |  |
| 5  |  |  |  |  |  |
| 6  |  |  |  |  |  |
| 7  |  |  |  |  |  |
| 8  |  |  |  |  |  |
| 9  |  |  |  |  |  |
| 10 |  |  |  |  |  |
| 11 |  |  |  |  |  |
| 12 |  |  |  |  |  |
| 13 |  |  |  |  |  |
| 14 |  |  |  |  |  |
| 15 |  |  |  |  |  |
| 16 |  |  |  |  |  |
| 17 |  |  |  |  |  |
| 18 |  |  |  |  |  |
| 19 |  |  |  |  |  |
| 20 |  |  |  |  |  |
| 21 |  |  |  |  |  |
| 22 |  |  |  |  |  |
| 23 |  |  |  |  |  |
| 24 |  |  |  |  |  |
| 25 |  |  |  |  |  |
| 26 |  |  |  |  |  |
| 27 |  |  |  |  |  |
| 28 |  |  |  |  |  |
| 29 |  |  |  |  |  |
| 30 |  |  |  |  |  |
| 31 |  |  |  |  |  |
| 32 |  |  |  |  |  |
| 33 |  |  |  |  |  |
| 34 |  |  |  |  |  |
| 35 |  |  |  |  |  |
| 36 |  |  |  |  |  |
| 37 |  |  |  |  |  |
| 38 |  |  |  |  |  |
| 39 |  |  |  |  |  |
| 40 |  |  |  |  |  |
| 41 |  |  |  |  |  |
| 42 |  |  |  |  |  |
| 43 |  |  |  |  |  |
| 44 |  |  |  |  |  |
| 45 |  |  |  |  |  |
| 46 |  |  |  |  |  |
| 47 |  |  |  |  |  |
| 48 |  |  |  |  |  |
| 49 |  |  |  |  |  |
| 50 |  |  |  |  |  |
| 51 |  |  |  |  |  |
| 52 |  |  |  |  |  |
| 53 |  |  |  |  |  |
| 54 |  |  |  |  |  |
| 55 |  |  |  |  |  |
| 56 |  |  |  |  |  |
| 57 |  |  |  |  |  |
| 58 |  |  |  |  |  |
| 59 |  |  |  |  |  |
| 60 |  |  |  |  |  |

443

444 **Figures**

445 Figure 1. Distribution of efficiency scores in the health systems of Asia

446 Figure 2. Association across health systems outputs, environmental factors and inputs

447

Figure 1. Distribution of efficiency scores in the health systems of Asia

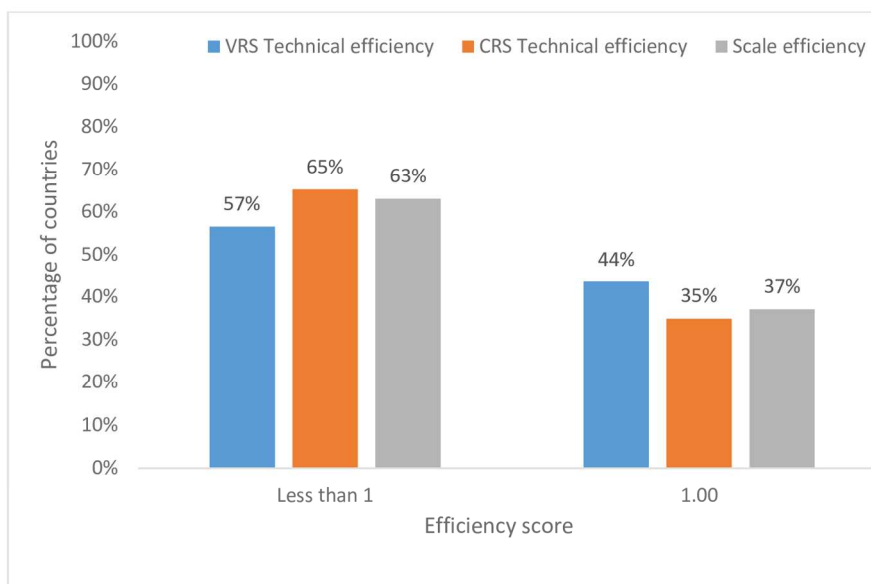

Figure 1. Distribution of efficiency scores in the health systems of Asia

147x92mm (300 x 300 DPI)

1  
2  
3  
4  
5  
6  
7  
8  
9  
10  
11  
12  
13  
14  
15  
16  
17  
18  
19  
20  
21  
22  
23  
24  
25  
26  
27  
28  
29  
30  
31  
32  
33  
34  
35  
36  
37  
38  
39  
40  
41  
42  
43  
44  
45  
46  
47  
48  
49  
50  
51  
52  
53  
54  
55  
56  
57  
58  
59  
60

Figure 2. Association across health systems outputs, environmental factors and inputs

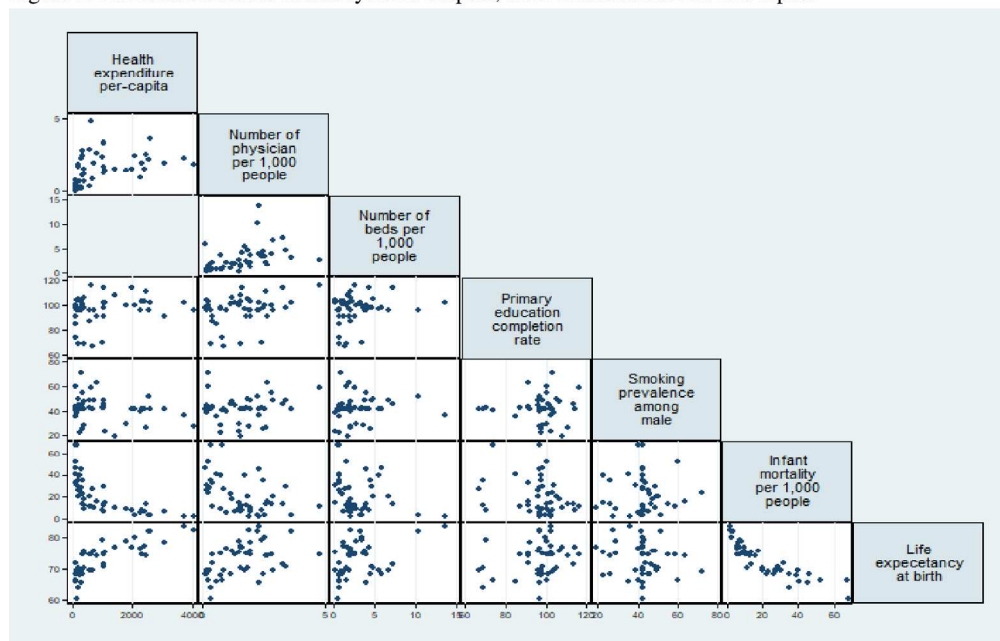

Figure 2. Association across health systems outputs, environmental factors and inputs

165x109mm (300 x 300 DPI)

# BMJ Open

## Measuring the efficiency of health systems in Asia: A data envelopment analysis

|                                 |                                                                                                                                                                                                                                                                                                                                                                                                                                                                                                                                                                                                                                                                                                                                                                                                                                                                                                                                                       |
|---------------------------------|-------------------------------------------------------------------------------------------------------------------------------------------------------------------------------------------------------------------------------------------------------------------------------------------------------------------------------------------------------------------------------------------------------------------------------------------------------------------------------------------------------------------------------------------------------------------------------------------------------------------------------------------------------------------------------------------------------------------------------------------------------------------------------------------------------------------------------------------------------------------------------------------------------------------------------------------------------|
| Journal:                        | <i>BMJ Open</i>                                                                                                                                                                                                                                                                                                                                                                                                                                                                                                                                                                                                                                                                                                                                                                                                                                                                                                                                       |
| Manuscript ID                   | bmjopen-2018-022155.R1                                                                                                                                                                                                                                                                                                                                                                                                                                                                                                                                                                                                                                                                                                                                                                                                                                                                                                                                |
| Article Type:                   | Research                                                                                                                                                                                                                                                                                                                                                                                                                                                                                                                                                                                                                                                                                                                                                                                                                                                                                                                                              |
| Date Submitted by the Author:   | 26-Aug-2018                                                                                                                                                                                                                                                                                                                                                                                                                                                                                                                                                                                                                                                                                                                                                                                                                                                                                                                                           |
| Complete List of Authors:       | Ahmed, Sayem; International Centre for Diarrhoeal Disease Research Bangladesh, Health Economics and Financing Research<br>Hasan, Md. Zahid; International Centre for Diarrhoeal Disease Research, Bangladesh, Health Systems and Population Studies Division<br>MacLennan, Mary; London School of Economics and Political Science, Department of Social Policy<br>Dorin, Farzana; International Centre for Diarrhoeal Disease Research Bangladesh, Health Economics and Financing Research<br>Ahmed, Mohammad; International Centre for Diarrhoeal Disease Research Bangladesh<br>Hasan, Md. Mehedi ; University of Queensland Faculty of Humanities and Social Sciences, Institute for Social Science Research<br>Hasan, Shaikh Mehdi ; International Centre for Diarrhoeal Disease Research Bangladesh<br>ISLAM, Mohammad Touhidul; World Health Organization Bangladesh<br>Khan, Jahangir; Liverpool School of Tropical Medicine, Health Economics |
| <b>Primary Subject Heading</b>: | Health economics                                                                                                                                                                                                                                                                                                                                                                                                                                                                                                                                                                                                                                                                                                                                                                                                                                                                                                                                      |
| Secondary Subject Heading:      | Health policy, Health services research                                                                                                                                                                                                                                                                                                                                                                                                                                                                                                                                                                                                                                                                                                                                                                                                                                                                                                               |
| Keywords:                       | Technical efficiency, Data envelopment analysis, Asian countries, Health systems efficiency                                                                                                                                                                                                                                                                                                                                                                                                                                                                                                                                                                                                                                                                                                                                                                                                                                                           |
|                                 |                                                                                                                                                                                                                                                                                                                                                                                                                                                                                                                                                                                                                                                                                                                                                                                                                                                                                                                                                       |

SCHOLARONE™  
Manuscripts

1  
2  
3 1 **Title.** Measuring the efficiency of health systems in Asia: A data envelopment analysis  
4

5  
6 2 **Short title.** Measuring the efficiency of health systems in Asia  
7

8 3 **Authors:** Sayem Ahmed<sup>1,2</sup>; Md. Zahid Hasan<sup>1</sup>; Mary MacLennan<sup>3</sup>; Farzana Dorin<sup>1</sup>; Mohammad  
9  
10 4 Wahid Ahmed<sup>1</sup>, Md. Mehedi Hasan<sup>4</sup>, Shaikh Mehdi Hasan<sup>1</sup>, Mohammad Touhidul Islam<sup>5</sup>, Jahangir  
11  
12 5 A. M. Khan<sup>2,6</sup>  
13

14 6  
15  
16 7 **Affiliation:** <sup>1</sup>) Health Systems and Population Studies Division, icddr,b, Dhaka, Bangladesh;

17  
18 8 <sup>2</sup>) Department of Learning, Informatics, Management and Ethics (LIME), Karolinska  
19  
20 9 Institutet, Stockholm, Sweden  
21

22  
23 10 <sup>3</sup>) Department of Social Policy, London School of Economics and Political Science, London,  
24  
25 11 United Kingdom  
26

27 12 <sup>4</sup>) Institute for Social Science Research, University of Queensland, Queensland, Australia  
28

29 13 <sup>5</sup>) World Health Organization Bangladesh, Dhaka, Bangladesh  
30

31 14 <sup>6</sup>) Liverpool School of Tropical Medicine, Liverpool, U.K.  
32  
33

34 15

35  
36 16 **\*Corresponding author**  
37

38 17 Sayem Ahmed, MHE, MS  
39

40 18 Postal address: Health Systems and Population Studies Division, icddr,b,  
41

42 19 68 Shahid Tajuddin Ahmed Sharani, Mohakhali, Dhaka-1212, Bangladesh.  
43

44 20 Cell. +8801912522643 Fax +88-02-8811568 E-mail address: [sayemahmed@icddr.org](mailto:sayemahmed@icddr.org)  
45  
46

47 21

48  
49 22 **Word count:** 3331  
50

51 23 **Keywords:** Technical efficiency, Data envelopment analysis, Asian countries, Health  
52  
53 24 systems.  
54

55 25  
56  
57  
58  
59  
60

## 26 ABSTRACT

27 **Objective:** This study aims to estimate the technical efficiency of health systems of Asian countries.

28 **Settings:** The study was conducted based on Asian countries.

29 **Methods:** We applied an output-oriented data envelopment analysis (DEA) approach to estimate the  
30 technical efficiency of the health systems in Asian countries. The DEA model used as input per-capita  
31 health expenditure (all healthcare resources as a proxy) and as output cross-country comparable health  
32 outcome indicators (e.g. HALE at birth and infant mortality per 1,000 live births). A tobit regression  
33 model was used to observe the associated factors with the efficiency scores. A sensitivity analysis was  
34 performed to assess the consistency of these scores.

35 **Results:** The main findings of this paper demonstrated that about (86.9 %) of the studied Asian  
36 countries were inefficient with respect to using healthcare systems resources. Most of the efficient  
37 countries belonged to the high-income group (Cyprus, Japan, and Singapore) and only one country  
38 belonged to the low- and lower middle-income group (Bangladesh). In Asia, through efficiency gain,  
39 the high-, upper middle-, lower and lower- middle-income countries can improve health systems  
40 outcome by 6.6%, 8.6%, and 8.7% respectively using the existing level of resources. Population  
41 density, beds density, and primary education completion rate significantly influenced the efficiency  
42 score.

43 **Conclusion:** The results of this analysis showed inefficiency of the health systems in most of the  
44 Asian countries and imply that many countries may improve their health systems efficiency using the  
45 current level of resources. The identified inefficient countries could pay attention to benchmarking  
46 their health systems within their income group or other similar type of health system.

### 47 **Strengths and limitations of this study:**

- 48 • Data envelopment analysis was used to determine the extent of inefficiency in health systems  
49 across Asia.
- 50 • We extracted health systems level indicators from the widely used world development  
51 indicators database and World Health Organization open data repository
- 52 • Due to data availability, we used health system outcomes in addressing the health systems  
53 efficiency rather than true health systems output



54

55 **BACKGROUND**

56 In Asia, there are approximately 4.4 billion people spread across highly diverse countries, from  
57 economic powerhouse like China and Singapore to poorer economies such as Laos, Cambodia, and  
58 Myanmar (1). The continent is often cited as the fastest-growing and most dynamic region in the  
59 world. Over the past number of years, Asian societies have also made impressive progress in ensuring  
60 better healthcare services, especially those targeted towards improving maternal and infant health and  
61 increasing life expectancy (2). However, whether economic gains have translated to efficient health  
62 systems across the region is still not well studied.

63 It is important that the healthcare resources in Asia are used efficiently. Overall, government spending  
64 on healthcare is low compared to total health expenditure and furthermore it is often not focused on  
65 those who need it most (3). For example, in the South Asia region governments spend 31% of total  
66 health expenditure, which is more than one percent of gross domestic product (4,5). In many Asian  
67 countries, personal health expenses or out-of-pocket payments is a major cause of poverty (1,6). From  
68 a study of 11 Asian countries, it was found that high levels of out-of-pocket healthcare spending have  
69 pushed 78 million people into poverty annually (7). Aging populations and non-communicable  
70 diseases that are often preventable but expensive to treat (e.g. diabetes and cancers linked to tobacco)  
71 impose and will continue to impose heavy costs on households and public health budgets. Moreover, a  
72 major challenge for Asian countries is the control and prevention of different communicable diseases  
73 (e.g. HIV/AIDS, tuberculosis, and polio) due to the movement of people across borders and the  
74 exchange of goods (8).

75 In light of this, it is very important that the health systems of these countries are efficient in making  
76 use of their resources. The World Health Organization (WHO) has estimated that about 20% to 40%  
77 of total healthcare resources are being wasted per year among the WHO member countries due to  
78 inefficiency. Further, this rate is high in low-and-middle income countries (LMICs) (9). In Asia, the  
79 variation in efficiency across income settings can perhaps lead to lessons learned in addressing it. In  
80 order to address inefficiency, Asia's health systems can look toward different dimensions of

1  
2  
3 81 performance such as their effectiveness, efficiency, access, equity, and quality (10). A great deal of  
4  
5 82 practitioner and academic literature has analyzed the relationship between the efficient production of  
6  
7 83 health services and universal health coverage (UHC) as well as the widespread importance of  
8  
9 84 measuring overall health system performance (9,11).

10  
11 85 Assessing the efficiency of healthcare systems is a difficult process as analyses often encounter  
12  
13 86 methodological problems, particularly due to the need for appropriate and valid outcome indicators  
14  
15 87 (12). Despite the empirical difficulties in applying efficiency concepts to health systems, efficiency  
16  
17 88 can be measured on both micro and macro levels (13). Measuring health system efficiency at a macro-  
18  
19 89 level is particularly important in order to understand health system performance across the globe and  
20  
21 90 take required action to minimize inefficiency (11,14).

22  
23 91 A number of studies have addressed healthcare efficiency in Americas (15,16), Western Europe  
24  
25 92 (17,18) and Asia (19,20) to shed light on the efficiency of different national health systems. A  
26  
27 93 systematic review on measuring efficiency related to several aspects of healthcare was performed by  
28  
29 94 Hollingsworth et al. (21). Dimas et al. evaluated the productivity of Greek public hospitals and found  
30  
31 95 that productivity changes were dominated by technical change (22). Zere et al. measured the technical  
32  
33 96 efficiency and productivity of hospitals in South Africa, and examined the impact of hospital  
34  
35 97 characteristics on efficiency and productivity (23).

36  
37 98 In an international study of efficiency in 170 countries, it was observed that Asian countries were  
38  
39 99 comparatively in the middle with respect to health system efficiency scores (24). This indicates that  
40  
41 100 there is room for improvement to optimize health benefits from the available health sector resources.  
42  
43 101 In this region, there are a number of studies at the country level to address health systems efficiency  
44  
45 102 (25,26), but cross country comparison of the health system efficiency is limited (27).

46  
47 103 Asian countries are not homogenous in terms of area, population, and economic conditions, however,  
48  
49 104 they have public health functions and a number of their health system outcomes in common (28).  
50  
51 105 Many of the countries share similar health systems problems, including inadequate resources for  
52  
53 106 healthcare and a high burden of diseases due to the geographical contiguity, disease patterns, and  
54  
55 107 social conditions. Understanding health systems efficiency in different Asian countries could promote  
56  
57 108 shared learning and highlight key areas of best practice, as well as areas where improvement is

1  
2  
3 109 needed. Furthermore, given geographical proximity and many strong relationships experienced with  
4  
5 110 near-by countries, there is likely to be relative ease in the ability to practically understand, learn and  
6  
7 111 apply nuance about healthcare systems from one country to another.

8  
9 112 A study of the efficiency of health systems in this region will help to provide lessons through  
10  
11 113 comparison across countries. This paper aims to achieve this goal through evaluating the technical  
12  
13 114 efficiency and scale efficiency of the healthcare systems of selected Asian countries.

14  
15 115

## 16 116 **METHODS**

17  
18  
19 117 This study employed Data Envelope Analysis (DEA) which is a commonly used non-parametric  
20  
21 118 method for efficiency analysis. It was used for estimating technical and scale efficiency scores of the  
22  
23 119 health systems of Asian countries.

### 24 120 **Input and output variables**

25  
26  
27 121 A main assumption of the DEA model used in our analysis was that in Asian countries, the selected  
28  
29 122 health outcomes were dependent on the inputs of healthcare resources. We selected the input variables  
30  
31 123 as proxies for the quantity of inputs that a country devotes to healthcare (i.e. health expenditure per  
32  
33 124 capita); and outcome variables of the healthy life expectancy at birth (HALE) and infant mortality  
34  
35 125 (per 1,000 live births). The relationship between health expenditure and outcomes considered here is  
36  
37 126 consistent with the view that health expenditure has diminishing returns, or additional expenditure  
38  
39 127 beyond a certain level has relatively smaller incremental effect on life expectancy or infant mortality  
40  
41 128 (29). To be clear, reduction in infant mortality and increase in life expectancy signify improvement in  
42  
43 129 the health outcomes of a country. Some studies have included life expectancy at birth as an outcome  
44  
45 130 variable (31–33), however, it is argued that quality of life matters as much as, if not more than,  
46  
47 131 quantity of life, and therefore life expectancy should be a weighted health quality measure. As a  
48  
49 132 result, HALE has been incorporated as a proxy of health quality as the outcome of health systems.  
50  
51 133 Also, it is important to note that instead of using the infant mortality directly in the DEA model, we  
52  
53 134 used the inverse of infant mortality as the model assumes that inputs and outputs are isotonic (i.e.  
54  
55 135 increased input reduces efficiency as well as increased output increases efficiency) (34). Without this

1  
2  
3 136 correction, a higher infant mortality figure would have been said to incorrectly contribute to a better  
4  
5 137 health system outcome.

6  
7 138

### 8 139 **Data sources**

9  
10 140 We used two main data sources: The World Health Organization data repository and World  
11  
12 141 Development Indicators-2015 (WDI). According to the list of United Nation Statistics Division, there  
13  
14 142 are 50 Asian countries and territories. Among these , 46 were used for this study (35). Four countries  
15  
16 143 and territories (Hong Kong, North Korea, Macao, and West bank and Gaza) were excluded due to  
17  
18 144 missing data of selected variables in the WDI database (5). However, selected variables for the study  
19  
20 145 countries were not reported in WDI for every year. This problem is unavoidable in studies based on  
21  
22 146 WDI data (36–38). Earlier studies adapted two approaches to deal with such problem. Firstly, they  
23  
24 147 used a value from a slightly earlier year as in Anderson et al. (36) and secondly, they used a smaller  
25  
26 148 number of countries in the model as in Fare et al. (37) and Grubaugh and Santerre (38). Given the  
27  
28 149 importance of including as many countries as possible to study technical efficiency using Data  
29  
30 150 Envelope Analysis, we opted for the first approach. However, to avoid missing variable we used  
31  
32 151 slightly earlier WDI statistics.

### 33 34 152 **Data envelopment analysis**

35  
36 153 DEA is one of the most widely used methods to assess the technical efficiency and scale efficiency of  
37  
38 154 a set of decision-making units (DMUs) (In the case of this analysis, DMUs are the 46 different Asian  
39  
40 155 countries). DEA is a non-parametric method which identifies an efficiency frontier on which only the  
41  
42 156 efficient DMUs are placed, by using linear programming techniques. One type of DEA model,  
43  
44 157 developed by Charnes, Cooper, and Rhodes (CCR), assumes that production has constant returns to  
45  
46 158 scale (CRS) meaning any change in the input will result in a proportionate change in the output (39).  
47  
48 159 Another model proposed by Banker, Charnes, and Cooper (BCC), assumes that production has  
49  
50 160 variable returns to scale (VRS) implying an increase in the input will result in either an increase or a  
51  
52 161 decrease in the output. The latter methodology is particularly useful for this study since it aims to  
53  
54 162 measure the efficiency related to organizational units (i.e. the health systems of the different  
55  
56 163 countries), which use numerous resources to produce multiple outputs and accommodate a more

1  
2  
3 164 flexible assumption of VRS (24,40). This is more realistic and reflective of changes in the real world  
4  
5 165 (25).

6  
7 166 Scale efficiency scores provide information on the optimality of the DMUs size. When a production  
8  
9 167 unit (DMU) operates at CRS, technical efficiency is equal to scale efficiency. However, when DMUs  
10  
11 168 are not operating at optimum scale, technical efficiency measured with the CCR model may be altered  
12  
13 169 by scale efficiency. The BCC model, which defines production through VRS, can incorporate the  
14  
15 170 impact of scale efficiency in the measurement of technical efficiency. This is measured as the ratio of  
16  
17 171 CRS technical efficiency scores and VRS technical efficiency scores (41).

18  
19 172 When it comes to DEA studies comparing countries, both the input and output oriented models have  
20  
21 173 been adopted for this type of analysis. An output-oriented DEA model aims to maximize the outputs  
22  
23 174 with a given amount of inputs; while input-oriented models focus on minimizing the inputs used to  
24  
25 175 obtain a certain amount of output. Many studies have been carried out using DEA to assess the  
26  
27 176 efficiency of healthcare systems using the two approaches in both high-income and low-income  
28  
29 177 countries (42–45). In this study, an output-oriented DEA model was deemed more appropriate based  
30  
31 178 on the premise that the input per capita expenditure is likely to be less flexible. In other words, health  
32  
33 179 system stewards are likely to have more leverage in controlling outputs through innovative  
34  
35 180 programming and improvements in healthcare provided, rather than by increasing spending and  
36  
37 181 resources.

38  
39 182

### 40 41 42 183 **Output oriented model**

43  
44 184 The output-oriented technical efficiency model focuses on increasing output without changing the  
45  
46 185 quantity of inputs used. The objective of the model for solving each particular DMU (country) is to  
47  
48 186 maximize the efficiency score (denoted by  $\phi$ ) meaning the amount by which all outputs can be  
49  
50 187 improved for each country under consideration while holding input constant.

51  
52  
53 188 The output-oriented DEA model is specified as follows.

$$54  
55  
56 \text{Max } \phi = \sum O_r Y_{rj_0} + O_0$$

189 Subject to constraints

$$\sum_{i=1}^m V_i + X_{ij_0} = 1$$

$$\sum_{r=1}^s O_r + Y_{rj} - \sum V_r X_{ij} + O_0 \leq 0, \quad j = 1, \dots, n$$

190  $O_r, V_i \geq 0$

191  $O_0 > 0, \text{ or } O_0 = 0 \text{ or } O_0 < 0$

192 Where,

193  $Y_{ij}$  = amount of output  $r$  from country  $j$ ,

194  $X_{ij}$  = amount of input  $i$  to country  $j$ ,

195  $O_r$  = weight given to output  $r$ ,

196  $V_i$  = weight given to input  $i$ ,

197  $n$  = number of countries,

198  $s$  = number of outputs,

199  $m$  = number of inputs.

200  $O_0 > 0$  defines increasing returns to scale,  $O_0 = 0$  defines constant returns to scale, and  $O_0 < 0$  defines  
201 decreasing returns to scale.

202 The technical efficiency scores is defined by  $\phi$  and it ranges between 0.00 and 1.00, If it is equal to  
203 1.00, then the production from the DMU is efficient; while if it is less than 1.00, the DMU is  
204 inefficient.

### 205 **Tobit regression analysis**

206 In the second stage, the VRS efficiency scores computed using the DEA model were regressed against  
207 some true inputs of the health systems (e.g. physician and beds density per 1000 population) and some  
208 environmental factors (Table 1). Since, by definition, the DEA scores range between zero and one,  
209 and some of the data tend to concentrate on these boundary values (i.e. censored for the DMUs with a  
210 value at one), ordinary least squares can not estimate the regression. Therefore, a tobit model is best  
211 for such regression. For the convenience of calculation, we assumed a censoring point at zero in this  
212 model. As a result, the efficient DMUs will have a score of zero and the inefficient DMUs will have  
213 score greater than zero. Following Zere et al. (46), we applied this method by transforming VRS  
214 technical efficiency scores into VRS inefficiency scores and leaving censoring at zero as follows.

$$\text{Inefficiency score} = \left( \frac{1}{\text{VRS technical efficiency score}} \right) - 1$$

215 The Tobit regression model used variables representing access to healthcare and health status. Guided  
 216 by several similar studies, physician density (the number of physicians per 1,000 population) and bed  
 217 density (the number of inpatient beds per 1,000 population) were selected as determinants of access to  
 218 healthcare (38,47). In addition to health care, the health status of individuals is determined by the  
 219 lifestyle and behaviors, therefore we also included two environmental factors as determinants of  
 220 efficiency, namely smoking prevalence among adult male (percentage of adults) and primary  
 221 education completion rate of relevant age group. The relevant age group for the primary completion  
 222 rate is defined as the number of new entrants (enrolments minus repeaters) in the last grade of primary  
 223 education (regardless of age); divided by the population at the entrance age for the last grade of  
 224 primary education of a country (48). The adverse health effect of smoking consequently affects health  
 225 outcomes (49,50). Education is found to be an important factor in determining individual health  
 226 status. Higher educational attainment is associated with higher income which in turn secures a healthy  
 227 living environment and access to healthcare (51). Additionally, we included population density  
 228 (population living per square kilometre of land area) as the control of efficiency. This is because  
 229 population density can affect the quality of healthcare services.

230 The Tobit regression models were specified as follows,

$$Ineff_i = \beta_0 + \beta_1 P \square y_i + \beta_2 Beds_i + \beta_3 Primay\_edu_i + \beta_4 Smoking_i + \beta_5 Inc_i + \beta_5 Pop\_density_i + \varepsilon_i$$

231 Where,

232 Ineff = the technical inefficiency score; continues variable.

233 Phy = Physician density; categorical variable (1= Fewer than 1 physician; 2= 1-2 physician, 3= More  
 234 than 2 physician)

235 Beds =Beds density; categorical variable (1= Fewer than 1 beds 3= More than 1 and less than or equal  
 236 to 3 beds, 3= More than 3 and less or equal to 5 beds, 4= More than 5 beds)

237 Inc= Income group of the country; categorical variable (1=Low income, 2=Lower-middle income,  
 238 3=Upper-middle-income, 4=High-income)

239 Pop\_density= Population density; categorical variable (1= Fewer than or equal to 50, 2= More than 50  
240 to fewer than or equal to 100, 3= More than 100 to fewer than or equal 200, 4= More than 200)

241 Finally,  $\varepsilon_i$  was the stochastic error term.

### 242 **Sensitivity analysis**

243 A sensitivity analysis of the efficiency score was conducted by running the DEA model several times  
244 using different combinations of input and outcome variables. We considered multiple models (e.g.  
245 dropping the efficient countries, using HALE at age 60, current health expenditure per capita (current  
246 US\$) as inputs. and using the complete set of data for the year 2015 (excluding countries with any  
247 missing variable)

### 248 **Patient and Public Involvement**

249 The study used secondary data from WHO and WDI data base. No patients were involved in this  
250 study. Study findings will be shared with the stakeholders, including local community groups in  
251 community meetings and at national or regional conferences.

252 .

## 253 **RESULTS**

254 The descriptive statistics of the selected input, output and environmental variables are shown in Table  
255 1. The health expenditure per-capita ranges from a minimum of 88.03 USD (Bangladesh) to a  
256 maximum of 4,405.13 USD (Japan) with a mean, median and standard deviation of 1,133.71, 663.94,  
257 and 1,157.72 respectively. The number of physicians per 1,000 people ranges from a minimum of 0.1  
258 at Timor-Leste to maximum 4.8 at Georgia. However, the number of inpatient beds per 1,000 people  
259 is smallest in Iran (0.1) and highest in Japan (13.7). The average smoking prevalence of the adult male  
260 people among the studied countries is 42.2 and average primary education completion rate is 96.5% of  
261 the relevant age group.

262

263 Table 1. Descriptive statistics of input and output variables



| Characteristics/ description                             | Mean     | Median | SD*      | Minimum | Maximum  | Source |
|----------------------------------------------------------|----------|--------|----------|---------|----------|--------|
| <b>Input variables</b>                                   |          |        |          |         |          |        |
| Health expenditure per capita, PPP                       | 1,133.71 | 663.94 | 1,157.72 | 88.03   | 4,405.13 | WDI    |
| <b>Outcome variables</b>                                 |          |        |          |         |          |        |
| Healthy life expectancy at birth (years)                 | 64.29    | 65.2   | 5.1      | 53.2    | 75.9     | WHO    |
| Infant mortality (per 1,000 live births)                 | 19.9     | 13.9   | 15.8     | 2.0     | 65.7     | WDI    |
| <b>Explanatory variables for Tobit model</b>             |          |        |          |         |          |        |
| Physicians (per 1,000 people)                            | 1.6      | 1.6    | 1.1      | 0.1     | 4.8      | WDI    |
| Hospital beds (per 1,000 people)                         | 2.9      | 2.1    | 2.7      | 0.1     | 13.7     | WDI    |
| Smoking prevalence, males (% of adults)                  | 42.2     | 42.2   | 10.5     | 18.9    | 71.8     | WDI    |
| Primary completion rate, total (% of relevant age group) | 96.5     | 97.9   | 11.4     | 66.7    | 116.5    | WDI    |

264 \*Standard deviation

265 Among the countries analyzed, HALE at birth was a minimum of 53.2 years in Afghanistan and a  
 266 maximum of 75.9 years in Singapore. The infant mortality rate ranged from 2.1 deaths per 1,000 live  
 267 births in Japan to 68.1 deaths per 1,000 live births in Afghanistan. On average, there were 21.1 deaths  
 268 per 1,000 live births in the studied countries. The scatter matrix of the input and output variables  
 269 shows that inputs, for instance, increase in per-capita healthcare expenditure was associated with  
 270 improved health outcomes (e.g. HALE at birth and reduced infant mortality) (Figure 1).

271

272 (Figure 1. will be inserted here)

273

274 The mean CRS and VRS technical efficiency scores were 0.780 and 0.921 respectively (Table 2).  
 275 Whereas, the mean scale efficiency score was 0.874. Considering VRS efficiency, Afghanistan has  
 276 the lowest score of 0.766 and 0.812. Both VRS and CRS technical efficiency score were positively  
 277 correlated with per capita health expenditure, HALE at birth, and negatively correlated with infant  
 278 mortality (supplementary table 1).

279 Out of 46 countries studied, only 4 (8.7%) countries showed the maximum level of (efficiency score  
 280 1.00) in VRS and CRS technical efficiency scale. All of these four countries showed scale efficiency  
 281 of 1.00 implying that these countries created the best practice frontier based on their input and output

1  
2  
3 282 combinations. 39.1% (18) countries showed increasing returns to scale, 52.2% (24) countries  
4  
5 283 decreasing returns to scale, and the 4 efficient countries constant returns to scale production function  
6  
7 284 of their health systems.

8  
9  
10 285

11  
12 286 (Table 2. will be inserted here)

13  
14 287

15  
16 288 More than half of the countries (30 countries) had VRS efficiency and five countries CRS efficiency  
17  
18 289 greater than 90% (supplementary figure 1).

#### 19 20 290 **Tobit regression analysis of associated factors with inefficiency**

21  
22 291 Tobit regression was employed to relate the VRS inefficiency scores to two health service production  
23  
24 292 variables and four environmental variables. Physician density, income status of countries, and  
25  
26 293 smoking prevalence among males exhibited a statistically insignificant positive association with the  
27  
28 294 inefficiency scores. The density of bed (>3 and <=5) had a significantly negative association with the  
29  
30 295 inefficiency scores compared to less than 1 beds category. Countries having more than 5 beds density  
31  
32 296 had no significant association with the inefficiency scores. After the bootstrapping more than 5 beds  
33  
34 297 density showed significant association with inefficiency score (supplementary table 2). However, the  
35  
36 298 coefficient was highest for (>3 and <=5) beds density. This indicates that sample countries with less  
37  
38 299 than 1 bed have lower technical efficiency of its health systems. Furthermore, the primary education  
39  
40 300 completion rate was significantly negatively associated with the inefficiency score which indicates  
41  
42 301 that countries with higher percentage of primary education completion rate have higher health system  
43  
44 302 efficiency. Population density had a significantly negative association with the inefficiency score.  
45  
46 303 Countries having less than 200 population per square kilometre were found to have lower efficiency.

#### 47 48 304 **Sensitivity of the efficiency scores**

49  
50 305 We conducted sensitivity analysis using various combinations of input and output variables. In all of  
51  
52 306 these cases the average of the efficiency scores varied from 0.812 to 0.936. The most sensitive  
53  
54 307 combination was found while using the HALE at age 60 as the input variable. The efficiency score  
55  
56 308 changed from 0.919 (main model) to 0.812 (considering input as HALE at age 60) (Figure 2).

309 (Figure 2. will be inserted here)

310

311 In Table 3, mean efficiency scores are presented by the income categories of the countries. The  
 312 highest mean VRS technical efficiency were observed for high income countries (0.934; 95% CI  
 313 0.905-0.963), followed by upper-middle-income (0.914; 95% CI: 0.894-0.935), and low and lower-  
 314 middle income countries (0.913; 95% CI: 0.891-0.935). With the existing input levels, the high-,  
 315 upper middle-, low- and lower-middle income countries could improve their health system outcome  
 316 by 6.6%, 8.7%, and 8.7% respectively.

317 Table 4. Mean efficiency scores according to income level of Asian countries

| Income groups                | VRS technical efficiency |               | Percentage of output can be improved in CRS technical efficiency |
|------------------------------|--------------------------|---------------|------------------------------------------------------------------|
|                              | Mean                     | 95% CI        |                                                                  |
| Low- and lower middle-income | 0.913                    | (0.891-0.935) | 8.7%                                                             |
| Upper middle-income          | 0.914                    | (0.894-0.935) | 8.6%                                                             |
| High -income                 | 0.934                    | (0.905-0.963) | 6.6%                                                             |

318

## 319 DISCUSSION

320 The main findings of this paper demonstrated that about (86.9 %) of the studied Asian countries are  
 321 technically inefficient with respect to using healthcare systems resources, (using a proxy of per capita  
 322 health expenditure). The study findings showed that the most efficient countries belonged to the high-  
 323 income group (Cyprus, Japan, and Singapore). Only one country belonged to the low- and lower  
 324 middle income group (Bangladesh). Among the 46 countries studied, only four countries (Bangladesh,  
 325 Japan, Singapore, and Cyprus) showed constant returns to scale efficiency, indicating that they were  
 326 operating at their most efficient level. Of the 14 high-income countries studied, 9 countries (75.0%)  
 327 had health system production at decreasing returns to scale. This implies that although the highest  
 328 number of efficient countries belonged to the high-income group, a large number of these countries  
 329 health system production requires more resources than the ideal situation. A similar situation was  
 330 observed for the upper-middle-income countries. Of the 13 countries, 10 (76.9%) had decreasing

1  
2  
3 331 returns to scale. Only 5 (23.8%) out of 21 low – and lower-middle-income countries were producing  
4  
5 332 at decreasing returns to scale. Although these low- and lower-middle-income countries are not  
6  
7 333 efficient, most of their production follows increasing returns to scale.

8  
9 334 It was observed that the average of the efficiency scores increased from the low and lower-middle-  
10  
11 335 income countries to high-income countries. An important policy implication of this study could be  
12  
13 336 that the technically inefficient low-income countries on average can improve their health systems  
14  
15 337 outcome by 8.7%, middle income country by 8.6%, and high income country by 6.6% using the  
16  
17 338 existing levels of per-capita health expenditure. An international study found a similar conclusion that  
18  
19 339 health systems performance is most efficient in the developed countries, according to simple  
20  
21 340 efficiency scores (52).

22  
23  
24 341 The overall healthcare efficiency in different countries varied considerably (53,54). Among the low-  
25  
26 342 and lower-middle income studied, one country demonstrated the most efficient health systems  
27  
28 343 (Bangladesh). This county has both technical and scale efficient health systems, like the high-income  
29  
30 344 countries (Japan, Singapore, and Cyprus) (55). A possible reason for the high efficiency of these  
31  
32 345 LMICs could be a focus on infant mortality and child health as prioritized in past Millennium  
33  
34 346 Development Goals and in current Sustainable Development Goals agendas, which relates to the  
35  
36 347 outcome variables used in this study.

37  
38 348 The DEA result showed that more than 60% of the low- and lower middle income countries had  
39  
40 349 health system efficiency greater than 90%. This result implies that these countries produce good  
41  
42 350 health at low cost and therefore make good use of health systems resources (56). This result suggests  
43  
44 351 that it is possible for countries to have a high-efficiency score with poor health outcomes because of  
45  
46 352 their low expenditure on resources and increasing returns to scale production function. In other words,  
47  
48 353 given their moderate consumption of inputs and challenging social environments, these countries can  
49  
50 354 achieve good health outcomes, relative to the other countries. Similar findings were observed for  
51  
52 355 Mexico and Turkey relative to other countries in a study of the OECD countries (33). It should be  
53  
54 356 noted that this study only used per-capita health expenditure and there are other factors that influence  
55  
56 357 health outcomes as well. For example differences in life expectancy and infant mortality between

1  
2  
3 358 populations can be due to lifestyles, preferences (49,57,58) social class, occupation (59) and  
4  
5 359 environmental factors (60,61). On a more macroscopic level, the results could also be impacted by a  
6  
7 360 variety of contextual factors among countries such as different political institutions, economic  
8  
9 361 landscapes, health-seeking behaviour patterns and burden of diseases among other things. However, in  
10  
11 362 this study, we attempted to address by including variables addressing the number of physicians,  
12  
13 363 number of inpatient beds, and population density, along with two environmental factors namely  
14  
15 364 primary completion rate of relevant age group and smoking prevalence among the adult male  
16  
17 365 population to take into consideration some of this variation. The results showed that more than three  
18  
19 366 and less than five beds per 1000 population significantly influenced the efficiency score. A low  
20  
21 367 number of beds cannot serve a large proportion of the population and therefore the systems may be  
22  
23 368 inefficient. Similarly, a high number of beds may often be left unused and make the health systems  
24  
25 369 inefficient The countries having more than 200 people living per square kilometre had a higher level  
26  
27 370 of efficiency in their health systems.

28  
29 371  
30  
31 372 A limitation of DEA methodology is that it works in a deterministic way, meaning that the results  
32  
33 373 entirely depend on the numeric values in the dataset. As the DEA approach compares DMUs, the  
34  
35 374 number and nature of DMUs in the data set can noticeably change the results. For example, if a more  
36  
37 375 efficient country is added to the dataset, it would move the frontier, causing some of the efficiency  
38  
39 376 scores of other countries to fall. This is a key aspect of the methodology used.

40  
41 377 Additionally, it is important to note that the use of a different set of variables might have generated  
42  
43 378 different conclusions. In the future, if additional data become available for a larger number of  
44  
45 379 countries in the region, the number of variables analyzed could be increased to include an  
46  
47 380 understanding with a greater degree of complexity in health system efficiency.

48  
49  
50 381 Another data limitation is the comparability of health expenditures among the Asian countries. While  
51  
52 382 recognizing that it is not possible to solve the inherent issues, we made an attempt to minimize it.  
53  
54 383 Since the actual amount of healthcare expenditure across different countries may not be comparable  
55  
56 384 due to the difference in purchasing power parity across countries, we used health expenditures as

1  
2  
3 385 constant of 2011 in PPP as an input in the DEA model (33). Also, when we included health  
4 386 expenditure at current USD per capita as an input in the DEA model we found that the efficiency  
5  
6 387 score did not change significantly.

8  
9 388 We applied sensitivity analysis to in an attempt overcome these limitations (Figure 2.) Our results  
10  
11 389 were consistent while using several combinations of inputs and outputs variables which is reassuring  
12  
13 390 and strengthens the findings from this study.

14  
15  
16 391

## 17 18 19 392 **CONCLUSIONS**

20  
21 393 This study provides an empirical picture of the technical efficiency of the healthcare systems of 46  
22  
23 394 Asian countries. It found that inefficiency exists in the healthcare systems of most of the countries  
24  
25 395 studied, however, the results point to three high-income and one low- and lower-middle-income  
26  
27 396 country which efficiently used healthcare systems resources. The interpretation of the inefficient  
28  
29 397 countries identified through this study is that they can improve health outcomes using the current level  
30  
31 398 of per-capita health expenditure. These countries could use these results to direct their attention to  
32  
33 399 benchmarking their health systems within their regional or another comparative group in order to  
34  
35 400 understand their health system performance in a more detailed way. This study addresses the need to  
36  
37 401 understand issues of efficiency, as well as potentially identify good examples of countries which  
38  
39 402 efficiently allocate and use resources to make their healthcare systems more technically efficient. It  
40  
41 403 narrows a gap in the literature as there are few countries studying healthcare efficiency in Asia and  
42  
43 404 looking comparatively in this manner.

## 44 45 405 **Acknowledgement**

46  
47 406 icddr,b is thankful to the Governments of Bangladesh, Canada, Sweden and the UK for providing  
48  
49 407 core/unrestricted support. The authors would like to thank The World Bank for providing open access  
50  
51 408 to the World Development Indicators database and the World Health Organization for their data  
52  
53 409 repository.

## 54 55 410 **Contributors**

1  
2  
3 411 SA, MZH and MM contributed to conceptualizing the research idea, study design, literature search,  
4  
5 412 data extraction and analysis, data interpretation, and writing the manuscript. MWA FD, SMH, MMH,  
6  
7 413 MTI and JAMK contributed to writing, reviewing and revising the manuscript. All authors read and  
8  
9 414 approved the final manuscript.

### 10 415 **Funding**

11  
12  
13 416 There are no funders to report for this submission

### 14 417 **Competing interest**

15  
16  
17 418 None declared.

### 18 419 **Data sharing statement**

19  
20  
21 420 Data were extracted from the World Bank Open Data repository for the “World Development  
22  
23 421 Indicators’ and from World Health Organization Global Health Observatory data. The  
24  
25 422 following links was used to extract the excel format of the indicators:  
26  
27 423 <https://data.worldbank.org/> and <http://www.who.int/gho/en/>.

### 28 424 **REFERENCES**

- 29  
30  
31 425 1. United Nations(a). IThe World Population Prospects: 2015 Revision. Vol. 1, Population  
32 426 Division. New York; 2013.
- 33  
34 427 2. Asandului L, Roman M, Fatulescu P. The Efficiency of Healthcare Systems in Europe: A Data  
35 428 Envelopment Analysis Approach. *Procedia Econ Financ.* 2014;10(14):261–8.
- 36  
37 429 3. Navaneelan T, Janz T. Health at a Glance [Internet]. Statistics Canada. 2014. 10 p. Available  
38 430 from: doi:10.1787/health\_glance-2015-en
- 39  
40 431 4. Vargas V, Begum T, Ahmed S, Smith O. Bangladesh – Fiscal space for health : Toward the  
41 432 Fiscal Space for Health in Bangladesh. Washington D.C.; 2016.
- 42  
43 433 5. The World Bank. World Development Indicators [Internet]. Washington, DC: The World  
44 434 Bank; 2017 [cited 2017 Oct 5]. Available from:  
45 435 <http://databank.worldbank.org/data/reports.aspx?source=world-development-indicators>
- 46  
47 436 6. Jacobs D. Low public expenditures on social welfare : do East Asian countries have a secret ?  
48 437 *2000;9(1990):2–16.*
- 49  
50 438 7. van Doorslaer E, O’Donnell O, Rannan-Eliya RP, Somanathan A, Adhikari SR, Garg CC, et  
51 439 al. Effect of payments for health care on poverty estimates in 11 countries in Asia: an analysis  
52 440 of household survey data. *Lancet.* 2006;368(9544):1357–64.
- 53  
54 441 8. WHO. Intercountry Cooperation : Cross-border Control of Priority Communicable Diseases.  
55 442 New Delhi; 2004.
- 56  
57 443 9. Chisholm D, Evans DB. Improving health system efficiency as a means of moving towards  
58 444 universal coverage. World Health Organization. Geneva; 2010.
- 59  
60 445 10. Schwartz WB, Mendelson DN. Eliminating waste and inefficiency can do little to contain  
446 costs. *Health Aff.* 1994;13(1):224–38.
- 447 11. Smith PC. Measuring health system performance. *Eur J Heal Econ.* 2002;3(3):145–8.
- 448 12. European Commission’s DG for Employment SA& I. Employment, Social Affairs & amp;



- 1  
2  
3 449 Inclusion - European Commission [Internet]. 2017. Available from:  
4 450 <http://ec.europa.eu/social/home.jsp?langId=en>
- 5 451 13. João Medeiros and Christoph Schwierz. Efficiency estimates of health care systems in the EU.  
6 452 Vol. 3187. 2015.
- 7 453 14. Papanicolas I, Smith PC. Health System Performance Comparison: An Agenda for Policy,  
8 454 Information and Research. 1st ed. European Observatory on Health Systems and Policies. New  
9 455 York: Open University Press; 2013. 1-417 p.
- 10 456 15. Chattopadhyay S, Ray SC. Technical, scale, and size efficiency in nursing home care: a  
11 457 nonparametric analysis of Connecticut homes. *Health Econ.* 1996;5(4):363–73.
- 12 458 16. Shroff HE, Gullede TR, Haynes KE, O’Neill MK. Siting efficiency of long-term health care  
13 459 facilities. *Socioecon Plann Sci* [Internet]. 1998;32(1):25–43. Available from:  
14 460 <http://www.sciencedirect.com/science/article/pii/S0038012197000165>
- 15 461 17. Hollingsworth B, Parkin D. The efficiency of the delivery of neonatal care in the UK. *J Public*  
16 462 *Health (Bangkok)* [Internet]. 2001 Mar 1;23(1):47–50. Available from:  
17 463 <http://dx.doi.org/10.1093/pubmed/23.1.47>
- 18 464 18. Giuffrida A, Gravelle H. Measuring performance in primary care: econometric analysis and  
19 465 DEA. *Appl Econ.* 2001 Feb;33(2):163–75.
- 20 466 19. Chang H. Determinants of Hospital Efficiency: the Case of Central Government-owned  
21 467 Hospitals in Taiwan. *Omega* [Internet]. 1998;26(2):307–17. Available from:  
22 468 <http://www.sciencedirect.com/science/article/pii/S0305048398000140>
- 23 469 20. Wan TTH, Hsu N, Feng R, Ma A, Pan S, Chou M. Technical efficiency of nursing units in a  
24 470 tertiary care hospital in Taiwan. *J Med Syst.* 2002 Feb;26(1):21–7.
- 25 471 21. Hollingsworth B, Dawson PJ, Maniadakis N. Efficiency measurement of health care: a review  
26 472 of non-parametric methods and applications. *Health Care Manag Sci.* 1999;2(3):161–72.
- 27 473 22. Dimas G, Goula A, Soulis S. Productive performance and its components in Greek public  
28 474 hospitals. *Oper Res.* 2012;12(1):15–27.
- 29 475 23. Zere E, McIntyre D, Addison T. TECHNICAL EFFICIENCY AND PRODUCTIVITY OF  
30 476 PUBLIC SECTOR HOSPITALS IN THREE SOUTH AFRICAN PROVINCES\*. *South*  
31 477 *African J Econ* [Internet]. 2005 Jul 6;69(2):336–58. Available from:  
32 478 <https://doi.org/10.1111/j.1813-6982.2001.tb00016.x>
- 33 479 24. Kim Y, Kang M. The Measurement of Health Care System Efficiency : Cross-country  
34 480 Comparison by Geographical Region. 2014;29(1):21–44.
- 35 481 25. Cheng Z, Tao H, Cai M, Lin H, Lin X, Shu Q, et al. Technical efficiency and productivity of  
36 482 Chinese county hospitals: an exploratory study in Henan province, China. *BMJ Open.*  
37 483 2015;5(9):e007267.
- 38 484 26. Jat TR, Sebastian MS. Technical efficiency of public district hospitals in Madhya Pradesh,  
39 485 India: A data envelopment analysis. *Glob Health Action.* 2013;6(1).
- 40 486 27. Hussey PS, De Vries H, Romley J, Wang MC, Chen SS, Shekelle PG, et al. A systematic  
41 487 review of health care efficiency measures: Health care efficiency. *Health Serv Res.*  
42 488 2009;44(3):784–805.
- 43 489 28. WHO. Health in Asia and the Pacific. Omi S, Plianbangchang S, editors. India: World Health  
44 490 Organization; 2008. 561 p.
- 45 491 29. Morris S, Devlin N, Parkin D, Spencer A. *Economic Analysis in Health Care.* 2nd ed.  
46 492 Chichester: John Wiley & Sons, Ltd; 2012. 292 p.
- 47 493 30. Edition S. *Economic Analysis in Healthcare.*
- 48 494 31. Kirigia JM, Sambo LG, Renner A, Alemu W, Seasa S, Bah Y. Technical efficiency of primary  
49 495 health units in Kailahun and Kenema districts of Sierra Leone. *Int Arch Med.* 2011;4(1):15.



- 1  
2  
3 496 32. Wranik D. Healthcare policy tools as determinants of health-system efficiency: evidence from  
4 497 the OECD. *Heal Econ Policy Law*. 2012;7(2):197–226.
- 5 498 33. Retzlaff-Roberts D, Chang CF, Rubin RM. Technical efficiency in the use of health care  
6 499 resources: A comparison of OECD countries. *Health Policy (New York)*. 2004;69(1):55–72.
- 7 500 34. Spinks J, Hollingsworth B. Cross-country comparisons of technical efficiency of health  
8 501 production: a demonstration of pitfalls. *Appl Econ*. 2009;41(4):417–27.
- 10 502 35. United Nation. United Nations Statistics Division- Standard Country and Area Codes  
11 503 Classifications [Internet]. United Nation. 2016 [cited 2016 Dec 12]. Available from:  
12 504 <https://unstats.un.org/unsd/methodology/m49/>
- 13 505 36. Anderson GF, Hurst J, Hussey PS, Jee-Hughes M. Health spending and outcomes: trends in  
14 506 OECD countries, 1960-1998. *Health Aff (Millwood)*. 2000;19(3):150–7.
- 15 507 37. Fare R, Grosskopf S, Lindgren B, Proullier JP. Productivity growth in health-care delivery.  
16 508 *Med Care*. 1997 Apr;35(4):354–66.
- 18 509 38. Grubaugh SG, Santerre RE. Comparing the Performance of Health Care Systems: An  
19 510 Alternative Approach. *South Econ J [Internet]*. 1994;60(4):1030–42. Available from:  
20 511 [http://search.ebscohost.com/login.aspx?direct=true&db=bth&AN=9406224388&site=ehost-](http://search.ebscohost.com/login.aspx?direct=true&db=bth&AN=9406224388&site=ehost-live)  
21 512 [live](http://search.ebscohost.com/login.aspx?direct=true&db=bth&AN=9406224388&site=ehost-live)
- 22 513 39. Charnes A, Cooper WW, Rhodes E. Measuring the efficiency of decision making units. *Eur J*  
23 514 *Oper Res*. 1978;2(6):429–44.
- 24 515 40. Banker RD, Charnes A, Cooper WW. Some Models for Estimating Technical and Scale  
25 516 Inefficiencies in Data Envelopment Analysis. *Manage Sci*. 1984 Sep;30(9):1078–92.
- 27 517 41. Cooper W, Seiford L, Tone K. Data envelopment analysis a comprehensive text with models,  
28 518 applications, references and Dea-Solver software. New York: Springer; 2007.
- 29 519 42. Masiye F. Investigating health system performance: An application of data envelopment  
30 520 analysis to Zambian hospitals. *BMC Health Serv Res [Internet]*. 2007;7(1):58. Available from:  
31 521 <http://bmchealthservres.biomedcentral.com/articles/10.1186/1472-6963-7-58>
- 33 522 43. Kirigia JM, Emrouznejad A, Gama Vaz R, Bastiene H, Padayachy J. A comparative  
34 523 assessment of performance and productivity of health centres in Seychelles. *Int J Product*  
35 524 *Perform Manag*. 2007;57(1):72–92.
- 36 525 44. Jat TR, Sebastian MS. Technical efficiency of public district hospitals in Madhya Pradesh,  
37 526 India: a data envelopment analysis. *Glob Health Action*. 2013 Jan;6(25):21742.
- 38 527 45. Osei D, d'Almeida S, George MO, Kirigia JM, Mensah AO, Kainyu LH. Technical efficiency  
39 528 of public district hospitals and health centres in Ghana: a pilot study. *Cost Eff Resour Alloc*.  
40 529 2005;3:9.
- 42 530 46. Zere E. Hospital Efficiency in Sub-Saharan Africa Evidence. Helsinki; 2000. Report No.: 187.
- 43 531 47. Newhouse JP, Friedlander LJ. The relationship between medical resources and measures of  
44 532 health: some additional evidence. *J Hum Resour*. 1980;15(2):200–18.
- 45 533 48. Starfield B. Health Services Research: A Working Model. *N Engl J Med [Internet]*. 1973 Jul  
46 534 19;289(3):132–6. Available from: <http://dx.doi.org/10.1056/NEJM197307192890305>
- 48 535 49. Johansson SE, Sundquist J. Change in lifestyle factors and their influence on health status and  
49 536 all-cause mortality. *Int J Epidemiol*. 1999;28(Cvd):1073–80.
- 50 537 50. Afonso A, St. Aubyn M. Assessing health efficiency across countries with a two-step and  
51 538 bootstrap analysis. *Appl Econ Lett*. 2011;18(13–15):1427–30.
- 53 539 51. Or Z. Determinants of health outcomes in industrialised countries: A pooled, cross-country,  
54 540 time-series analysis. Vol. 30, *OECD Economic Studies*. 2000. 53-77 p.
- 55 541 52. Grosskopf S, Self S, Zaim O. Estimating the efficiency of the system of healthcare financing  
56 542 in achieving better health. *Appl Econ [Internet]*. 2006;38(13):1477–88. Available from:

- 1  
2  
3 543 <http://www.tandfonline.com/doi/abs/10.1080/00036840500424798>
- 4 544 53. European Union. Comparative efficiency of health systems , corrected for selected lifestyle  
5 545 factors Final report. European Commision. 2014.
- 6 546 54. Joumard I, André C, Nicq C. Health care systems: Effeciency and institutions. 2010;1–132.
- 8 547 55. Koblinsky M, Anwar I, Mridha MK, Chowdhury ME, Botlero R. Reducing maternal mortality  
9 548 and improving maternal health: Bangladesh and MDG 5. *J Heal Popul Nutr.* 2008;26(3):280–  
10 549 94.
- 11 550 56. Balabanova D, Mills A, Conteh L, Akkazieva B, Banteyerga H, Dash U, et al. Good health at  
12 551 low cost 25 years on: Lessons for the future of health systems strengthening. *Lancet.*  
13 552 2013;381(9883):2118–33.
- 14 553 57. Colditz GA, Atwood KA, Emmons K, Monson RR, Willett WC, Trichopoulos D, et al.  
15 554 Harvard report on cancer prevention volume 4: Harvard Cancer Risk Index. *Cancer Causes*  
16 555 *Control.* 2000;11(6):477–88.
- 18 556 58. Laaksonen M, McAlister AL, Laatikainen T, Drygas W, Morava E, Nüssel E, et al. Do health  
19 557 behaviour and psychosocial risk factors explain the European East-Westgap in health status?  
20 558 *Eur J Public Health.* 2001;11(1):65–73.
- 21 559 59. Hart CL, Smith GD, Blane D. Inequalities in mortality by social class measured at 3 stages of  
22 560 the lifecourse. *Am J Public Health.* 1998;88(3):471–4.
- 24 561 60. Cohen DA, Mason K, Bedimo A, Scribner R, Basolo V, Farley TA. Neighborhood physical  
25 562 conditions and health. *Am J Public Health.* 2003;93(3):467–71.
- 26 563 61. Jerrett M, Eyles J, Cole D. Socioeconomic and environmental covariates of premature  
27 564 mortality in Ontario. *Soc Sci Med.* 1998;47(1):33–49.
- 28  
29 565

31 566 **Tables**

32  
33 567 Table 2. Technical and scale efficiency score of the health systems in Asian countries

| Country name      | CRS Technical efficiency | VRS Technical efficiency | Scale efficiency | Returns to scale |
|-------------------|--------------------------|--------------------------|------------------|------------------|
| Afghanistan       | 0.724                    | 0.812                    | 0.891            | 1                |
| Armenia           | 0.769                    | 0.946                    | 0.813            | -1               |
| Azerbaijan        | 0.660                    | 0.902                    | 0.732            | -1               |
| Bahrain           | 0.714                    | 0.910                    | 0.784            | -1               |
| Bangladesh        | 1.000                    | 1.000                    | 1.000            | 0                |
| Bhutan            | 0.775                    | 0.903                    | 0.858            | 1                |
| Brunei Darussalam | 0.708                    | 0.920                    | 0.769            | -1               |
| Cambodia          | 0.805                    | 0.916                    | 0.879            | 1                |
| China             | 0.806                    | 0.975                    | 0.826            | -1               |
| Cyprus            | 1.000                    | 1.000                    | 1.000            | 1                |
| Georgia           | 0.751                    | 0.923                    | 0.813            | -1               |
| India             | 0.778                    | 0.892                    | 0.872            | 1                |
| Indonesia         | 0.746                    | 0.904                    | 0.826            | 1                |
| Iran              | 0.678                    | 0.900                    | 0.754            | -1               |
| Iraq              | 0.683                    | 0.850                    | 0.803            | 1                |
| Israel            | 0.874                    | 0.967                    | 0.904            | -1               |
| Japan             | 1.000                    | 1.000                    | 1.000            | 0                |

1  
2  
3  
4  
5  
6  
7  
8  
9  
10  
11  
12  
13  
14  
15  
16  
17  
18  
19  
20  
21  
22  
23  
24  
25  
26  
27  
28  
29  
30  
31  
32  
33  
34  
35  
36  
37  
38  
39  
40  
41  
42  
43  
44  
45  
46  
47  
48  
49  
50  
51  
52  
53  
54  
55  
56  
57  
58  
59  
60

|                      |                      |                      |                     |    |
|----------------------|----------------------|----------------------|---------------------|----|
| Jordan               | 0.743                | 0.943                | 0.789               | -1 |
| Kazakhstan           | 0.695                | 0.882                | 0.788               | 1  |
| South Korea          | 0.886                | 0.972                | 0.911               | -1 |
| Kuwait               | 0.674                | 0.885                | 0.762               | -1 |
| Kyrgyz Republic      | 0.806                | 0.941                | 0.856               | 1  |
| Laos                 | 0.818                | 0.889                | 0.920               | 1  |
| Lebanon              | 0.746                | 0.910                | 0.820               | 1  |
| Malaysia             | 0.778                | 0.927                | 0.839               | 1  |
| Maldives             | 0.730                | 0.944                | 0.773               | -1 |
| Mongolia             | 0.737                | 0.896                | 0.823               | 1  |
| Myanmar              | 0.743                | 0.872                | 0.852               | 1  |
| Nepal                | 0.861                | 0.932                | 0.924               | 1  |
| Oman                 | 0.692                | 0.896                | 0.772               | -1 |
| Pakistan             | 0.827                | 0.889                | 0.930               | 1  |
| Philippines          | 0.779                | 0.916                | 0.850               | 1  |
| Qatar                | 0.677                | 0.903                | 0.749               | -1 |
| Saudi Arabia         | 0.624                | 0.871                | 0.716               | -1 |
| Singapore            | 1.000                | 1.000                | 1.000               | 0  |
| Sri Lanka            | 0.904                | 0.985                | 0.917               | -1 |
| Syria                | 0.818                | 0.848                | 0.964               | 1  |
| Tajikistan           | 0.856                | 0.964                | 0.888               | -1 |
| Thailand             | 0.791                | 0.956                | 0.828               | -1 |
| Timor-Leste          | 0.823                | 0.903                | 0.912               | 1  |
| Turkey               | 0.710                | 0.916                | 0.776               | -1 |
| Turkmenistan         | 0.639                | 0.859                | 0.743               | 1  |
| United Arab Emirates | 0.691                | 0.889                | 0.777               | 1  |
| Uzbekistan           | 0.784                | 0.947                | 0.828               | -1 |
| Vietnam              | 0.845                | 0.996                | 0.849               | -1 |
| Yemen                | 0.727                | 0.826                | 0.881               | 1  |
| <b>Mean (95% CI)</b> | <b>0.780</b>         | <b>0.919</b>         | <b>0.847</b>        | -  |
|                      | <b>(0.752-0.808)</b> | <b>(0.905-0.933)</b> | <b>(0.824-0.87)</b> | -  |
| <b>Median</b>        | 0.772                | 0.913                | 0.834               | -  |
| <b>Minimum</b>       | 0.624                | 0.812                | 0.716               | -  |
| <b>Maximum</b>       | 1                    | 1                    | 1                   | -  |

568

569

570 Table 3. Result from tobit regression analysis

| <b>Variable</b>                                 | <b>Coefficient (95% CI)</b> | <b>P-value</b> |
|-------------------------------------------------|-----------------------------|----------------|
| <b>Physician density (per 1,000 population)</b> |                             |                |
| Fewer than 1 physician                          |                             |                |
| 1-2 physician                                   | -0.0005 (-0.0363,0.0353)    | 0.9780         |
| More than 2 physician                           | -0.0003 (-0.0445,0.044)     | 0.9900         |
| <b>Bed density (per 1,000 population)</b>       |                             |                |
| Fewer than 1 beds                               |                             | 1.000          |
| More than 1 and less than or equal to 3 beds    | -0.0146 (-0.0558,0.0267)    | 0.4770         |

20

|                                                                 |                                                                                             |         |
|-----------------------------------------------------------------|---------------------------------------------------------------------------------------------|---------|
| More than 3 and less or equal to 5 beds                         | -0.0398 (-0.0852,0.0055)                                                                    | 0.0830  |
| More than 5 beds                                                | -0.0412 (-0.0917,0.0092)                                                                    | 0.1060  |
| <b>Primary completion rate, total (% of relevant age group)</b> | -0.0018 (-0.003--0.0007)                                                                    | 0.0030  |
| <b>Smoking prevalence, males (% of adults)</b>                  | 0.0002 (-0.0012-0.0016)                                                                     | 0.7470  |
| <b>Income group</b>                                             |                                                                                             |         |
| Low income                                                      |                                                                                             | 1.00    |
| Lower-middle income                                             | -0.0367 (-0.1041-0.0306)                                                                    | 0.2750  |
| Upper-middle-income                                             | -0.0240 (-0.0986-0.0506)                                                                    | 0.5170  |
| High-income                                                     | -0.0279 (-0.107-0.0513)                                                                     | 0.4790  |
| <b>Population live per square kilometre of land area</b>        |                                                                                             |         |
| less than or equal to 50                                        |                                                                                             | 1.000   |
| >50 to <=100                                                    | -0.053 (-0.0892--0.0168)                                                                    | 0.0050  |
| >100 to <=200                                                   | -0.0678 (-0.1071--0.0285)                                                                   | 0.0010  |
| More than 200                                                   | -0.0867 (-0.1224--0.0509)                                                                   | 0.0000  |
| Constant                                                        | 0.3623 (0.2233-0.5014)                                                                      | 0.0000  |
| Sigma                                                           | 0.0394(0.0305-0.0484)                                                                       | -       |
| Observations summary                                            | 4 left-censored observations<br>42 uncensored observations<br>0 right-censored observations |         |
| Number of observation                                           |                                                                                             | 46 -    |
| Log likelihood                                                  |                                                                                             | 71.4 -  |
| Prob. > chi2                                                    |                                                                                             | 0.000 - |

571

572

573

574 **Figures**

575 Figure 1. Association across health systems input and outcome

576 Figure 2. Results from the sensitivity analysis of efficiency scores

577

1  
2  
3  
4  
5  
6  
7  
8  
9  
10  
11  
12  
13  
14  
15  
16  
17  
18  
19  
20  
21  
22  
23  
24  
25  
26  
27  
28  
29  
30  
31  
32  
33  
34  
35  
36  
37  
38  
39  
40  
41  
42  
43  
44  
45  
46  
47  
48  
49  
50  
51  
52  
53  
54  
55  
56  
57  
58  
59  
60

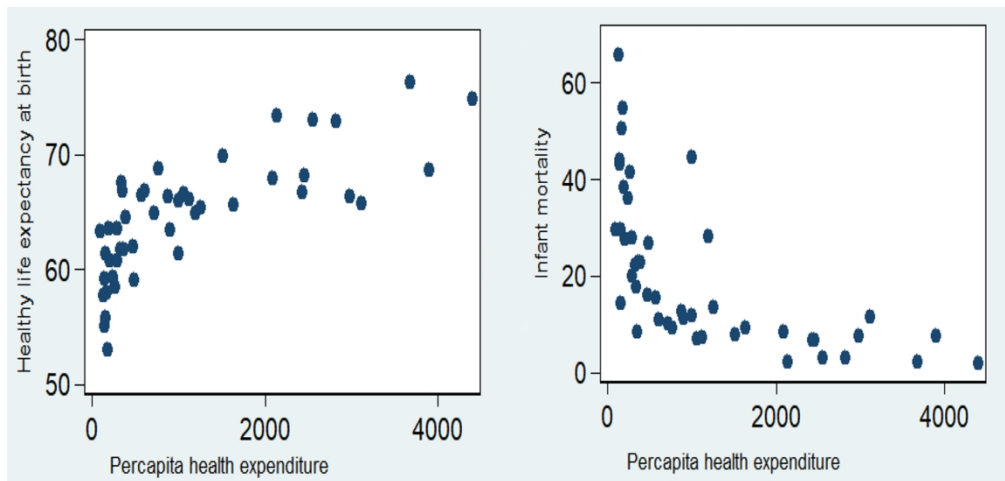

Figure 1. Association across health systems input and outcome  
189x91mm (300 x 300 DPI)

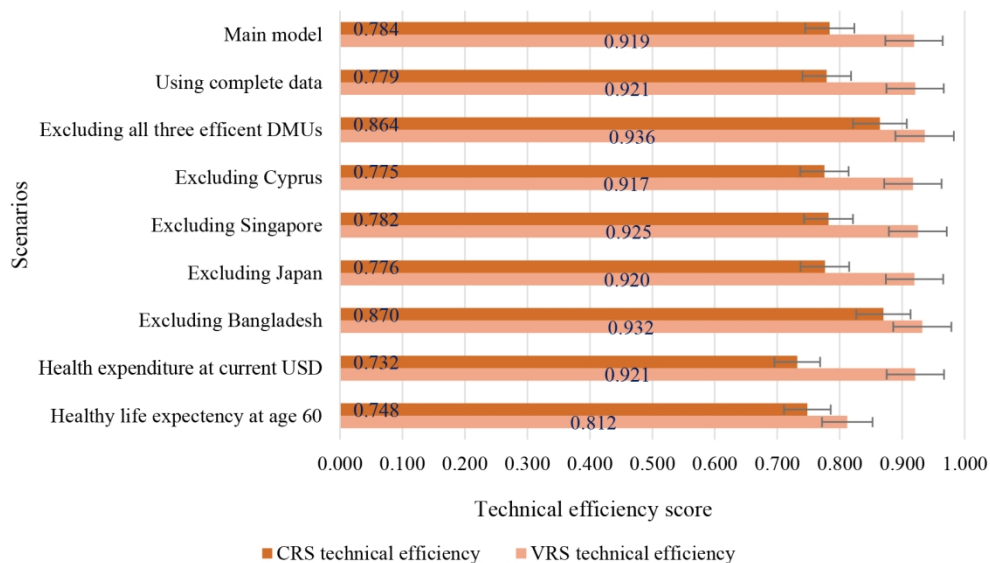

Figure 2. Results from the sensitivity analysis of efficiency scores

155x91mm (300 x 300 DPI)

Supplementary Table 1. Correlation among technical efficiency, input, and output variables

| Variables                            | CRS technical efficiency | VRS technical efficiency | Per capita health expenditure | Healthy life expectancy at birth | Infant mortality |
|--------------------------------------|--------------------------|--------------------------|-------------------------------|----------------------------------|------------------|
| <b>CRS technical efficiency</b>      | 1.000                    |                          |                               |                                  |                  |
| <b>VRS technical efficiency</b>      | 0.739                    | 1.000                    |                               |                                  |                  |
| <b>Per capita health expenditure</b> | 0.089                    | 0.277                    | 1.000                         |                                  |                  |
| <b>Healthy life expectancy</b>       | 0.343                    | 0.755                    | 0.774                         | 1.000                            |                  |
| <b>Infant mortality</b>              | -0.092                   | -0.485                   | -0.651                        | -0.811                           | 1.000            |

Supplementary Table 2. Result from bootstrap method

| Variable                                                        | Coefficient | Bootstrap standard error | p-value | 95% CI           |
|-----------------------------------------------------------------|-------------|--------------------------|---------|------------------|
| <b>Physician density (per 1,000 population)</b>                 |             |                          |         |                  |
| Fewer than 1 physician                                          | 1.000       | -                        | -       | -                |
| 1-2 physician                                                   | 0.007       | 0.014                    | 0.622   | (-0.02,0.0346)   |
| More than 2 physician                                           | -0.009      | 0.018                    | 0.631   | (-0.0424,0.026)  |
| <b>Bed density (per 1,000 population)</b>                       |             |                          |         |                  |
| Fewer than 1 beds                                               | 1.000       | -                        | -       | -                |
| > 1 to <=3 beds                                                 | 0.032       | 0.016                    | 0.047   | (-0.0003,0.0639) |
| > 3 to <=5 beds                                                 | 0.052       | 0.018                    | 0.004   | (0.016,0.0851)   |
| More than 5 beds                                                | 0.047       | 0.021                    | 0.024   | (0.0058,0.0874)  |
| <b>Primary completion rate, total (% of relevant age group)</b> |             |                          |         |                  |
|                                                                 | 0.001       | 0.000                    | 0.002   | (0.0005,0.0022)  |
| <b>Smoking prevalence, males (% of adults)</b>                  |             |                          |         |                  |
|                                                                 | 0.000       | 0.001                    | 0.735   | (-0.0008,0.0012) |
| <b>Income group</b>                                             |             |                          |         |                  |
| Low- and lower-middle income                                    | 1.000       | -                        | -       | -                |
| Upper-middle-income                                             | -0.007      | 0.014                    | 0.637   | (-0.0357,0.0201) |
| High-income                                                     | -0.026      | 0.017                    | 0.130   | (-0.0619,0.0094) |
| <b>Population live per square meter of land</b>                 |             |                          |         |                  |
| less than or equal to 100                                       | 1.000       | -                        | -       | -                |
| >100 to <=200                                                   | 0.021       | 0.014                    | 0.000   | (-0.004,0.0493)  |
| More than 200                                                   | 0.044       | 0.013                    | 0.000   | (0.0173,0.0684)  |
| Constant                                                        | 0.737       | 0.046                    | 0.000   | (0.6431,0.8262)  |
| Sigma                                                           | 0.030       | 0.003                    | 0.000   | (0.0197,0.0324)  |
| Number of observation                                           |             |                          |         | 42               |
| Number of efficient DMUs                                        |             |                          |         | 4                |
| Number of bootstrap (reps)                                      |             |                          |         | 1000             |
| Prob. > chi2                                                    |             |                          |         | 0.0000           |

Supplementary Figure 1. Distribution of the efficiency scores of Asian health systems

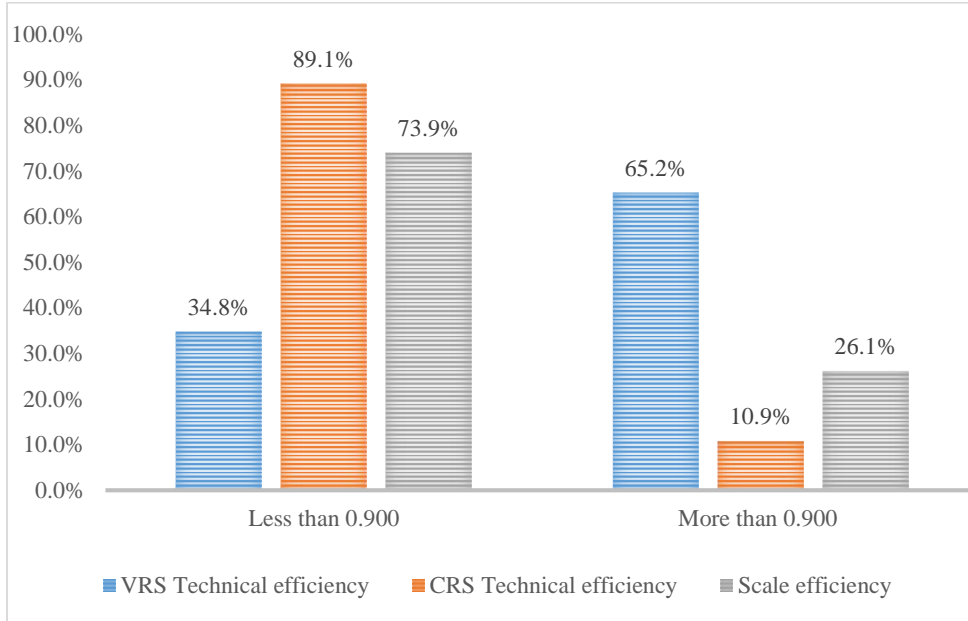

Peer review only



STROBE Statement—Checklist of items that should be included in reports of *cross-sectional studies*

|                     |                              | Item No | Recommendation                                                                                                                                                                                               |
|---------------------|------------------------------|---------|--------------------------------------------------------------------------------------------------------------------------------------------------------------------------------------------------------------|
| ×                   | <b>Title and abstract</b>    | 1       | (a) Indicate the study's design with a commonly used term in the title or the abstract<br>(b) Provide in the abstract an informative and balanced summary of what was done and what was found                |
| <b>Introduction</b> |                              |         |                                                                                                                                                                                                              |
| ×                   | Background/rationale         | 2       | Explain the scientific background and rationale for the investigation being reported                                                                                                                         |
| ×                   | Objectives                   | 3       | State specific objectives, including any prespecified hypotheses                                                                                                                                             |
| <b>Methods</b>      |                              |         |                                                                                                                                                                                                              |
| ×                   | Study design                 | 4       | Present key elements of study design early in the paper                                                                                                                                                      |
| ×                   | Setting                      | 5       | Describe the setting, locations, and relevant dates, including periods of recruitment, exposure, follow-up, and data collection                                                                              |
|                     | Participants                 | 6       | (a) Give the eligibility criteria, and the sources and methods of selection of participants                                                                                                                  |
| ×                   | Variables                    | 7       | Clearly define all outcomes, exposures, predictors, potential confounders, and effect modifiers. Give diagnostic criteria, if applicable                                                                     |
| ×                   | Data sources/<br>measurement | 8*      | For each variable of interest, give sources of data and details of methods of assessment (measurement). Describe comparability of assessment methods if there is more than one group                         |
|                     | Bias                         | 9       | Describe any efforts to address potential sources of bias                                                                                                                                                    |
| ×                   | Study size                   | 10      | Explain how the study size was arrived at                                                                                                                                                                    |
| ×                   | Quantitative variables       | 11      | Explain how quantitative variables were handled in the analyses. If applicable, describe which groupings were chosen and why                                                                                 |
| ×                   | Statistical methods          | 12      | (a) Describe all statistical methods, including those used to control for confounding                                                                                                                        |
|                     |                              |         | (b) Describe any methods used to examine subgroups and interactions                                                                                                                                          |
| ×                   |                              |         | (c) Explain how missing data were addressed                                                                                                                                                                  |
|                     |                              |         | (d) If applicable, describe analytical methods taking account of sampling strategy                                                                                                                           |
| ×                   |                              |         | (e) Describe any sensitivity analyses                                                                                                                                                                        |
| <b>Results</b>      |                              |         |                                                                                                                                                                                                              |
| ×                   | Participants                 | 13*     | (a) Report numbers of individuals at each stage of study—eg numbers potentially eligible, examined for eligibility, confirmed eligible, included in the study, completing follow-up, and analysed            |
|                     |                              |         | (b) Give reasons for non-participation at each stage                                                                                                                                                         |
|                     |                              |         | (c) Consider use of a flow diagram                                                                                                                                                                           |
| ×                   | Descriptive data             | 14*     | (a) Give characteristics of study participants (eg demographic, clinical, social) and information on exposures and potential confounders                                                                     |
|                     |                              |         | (b) Indicate number of participants with missing data for each variable of interest                                                                                                                          |
|                     | Outcome data                 | 15*     | Report numbers of outcome events or summary measures                                                                                                                                                         |
| ×                   | Main results                 | 16      | (a) Give unadjusted estimates and, if applicable, confounder-adjusted estimates and their precision (eg, 95% confidence interval). Make clear which confounders were adjusted for and why they were included |

|                          |                  |    |                                                                                                                                                                            |
|--------------------------|------------------|----|----------------------------------------------------------------------------------------------------------------------------------------------------------------------------|
|                          |                  |    | (b) Report category boundaries when continuous variables were categorized                                                                                                  |
|                          |                  |    | (c) If relevant, consider translating estimates of relative risk into absolute risk for a meaningful time period                                                           |
| ×                        | Other analyses   | 17 | Report other analyses done—eg analyses of subgroups and interactions, and sensitivity analyses                                                                             |
| <b>Discussion</b>        |                  |    |                                                                                                                                                                            |
| ×                        | Key results      | 18 | Summarise key results with reference to study objectives                                                                                                                   |
| ×                        | Limitations      | 19 | Discuss limitations of the study, taking into account sources of potential bias or imprecision. Discuss both direction and magnitude of any potential bias                 |
| ×                        | Interpretation   | 20 | Give a cautious overall interpretation of results considering objectives, limitations, multiplicity of analyses, results from similar studies, and other relevant evidence |
| ×                        | Generalisability | 21 | Discuss the generalisability (external validity) of the study results                                                                                                      |
| <b>Other information</b> |                  |    |                                                                                                                                                                            |
| ×                        | Funding          | 22 | Give the source of funding and the role of the funders for the present study and, if applicable, for the original study on which the present article is based              |

\*Give information separately for exposed and unexposed groups.

**Note:** An Explanation and Elaboration article discusses each checklist item and gives methodological background and published examples of transparent reporting. The STROBE checklist is best used in conjunction with this article (freely available on the Web sites of PLoS Medicine at <http://www.plosmedicine.org/>, Annals of Internal Medicine at <http://www.annals.org/>, and Epidemiology at <http://www.epidem.com/>). Information on the STROBE Initiative is available at [www.strobe-statement.org](http://www.strobe-statement.org).

# BMJ Open

## Measuring the efficiency of health systems in Asia: A data envelopment analysis

|                                 |                                                                                                                                                                                                                                                                                                                                                                                                                                                                                                                                                                                                                                                                                                                                                                                                                                                                                                                                                       |
|---------------------------------|-------------------------------------------------------------------------------------------------------------------------------------------------------------------------------------------------------------------------------------------------------------------------------------------------------------------------------------------------------------------------------------------------------------------------------------------------------------------------------------------------------------------------------------------------------------------------------------------------------------------------------------------------------------------------------------------------------------------------------------------------------------------------------------------------------------------------------------------------------------------------------------------------------------------------------------------------------|
| Journal:                        | <i>BMJ Open</i>                                                                                                                                                                                                                                                                                                                                                                                                                                                                                                                                                                                                                                                                                                                                                                                                                                                                                                                                       |
| Manuscript ID                   | bmjopen-2018-022155.R2                                                                                                                                                                                                                                                                                                                                                                                                                                                                                                                                                                                                                                                                                                                                                                                                                                                                                                                                |
| Article Type:                   | Research                                                                                                                                                                                                                                                                                                                                                                                                                                                                                                                                                                                                                                                                                                                                                                                                                                                                                                                                              |
| Date Submitted by the Author:   | 01-Dec-2018                                                                                                                                                                                                                                                                                                                                                                                                                                                                                                                                                                                                                                                                                                                                                                                                                                                                                                                                           |
| Complete List of Authors:       | Ahmed, Sayem; International Centre for Diarrhoeal Disease Research Bangladesh, Health Economics and Financing Research<br>Hasan, Md. Zahid; International Centre for Diarrhoeal Disease Research, Bangladesh, Health Systems and Population Studies Division<br>MacLennan, Mary; London School of Economics and Political Science, Department of Social Policy<br>Dorin, Farzana; International Centre for Diarrhoeal Disease Research Bangladesh, Health Economics and Financing Research<br>Ahmed, Mohammad; International Centre for Diarrhoeal Disease Research Bangladesh<br>Hasan, Md. Mehedi ; University of Queensland Faculty of Humanities and Social Sciences, Institute for Social Science Research<br>Hasan, Shaikh Mehdi ; International Centre for Diarrhoeal Disease Research Bangladesh<br>ISLAM, Mohammad Touhidul; World Health Organization Bangladesh<br>Khan, Jahangir; Liverpool School of Tropical Medicine, Health Economics |
| <b>Primary Subject Heading</b>: | Health economics                                                                                                                                                                                                                                                                                                                                                                                                                                                                                                                                                                                                                                                                                                                                                                                                                                                                                                                                      |
| Secondary Subject Heading:      | Health policy, Health services research                                                                                                                                                                                                                                                                                                                                                                                                                                                                                                                                                                                                                                                                                                                                                                                                                                                                                                               |
| Keywords:                       | Technical efficiency, Data envelopment analysis, Asian countries, Health systems efficiency                                                                                                                                                                                                                                                                                                                                                                                                                                                                                                                                                                                                                                                                                                                                                                                                                                                           |
|                                 |                                                                                                                                                                                                                                                                                                                                                                                                                                                                                                                                                                                                                                                                                                                                                                                                                                                                                                                                                       |

SCHOLARONE™  
Manuscripts

1  
2  
3 1 **Title.** Measuring the efficiency of health systems in Asia: A data envelopment analysis  
4  
5

6 2 **Short title.** Measuring the efficiency of health systems in Asia  
7

8 3 **Authors:** Sayem Ahmed<sup>1,2</sup>; Md. Zahid Hasan<sup>1</sup>; Mary MacLennan<sup>3</sup>; Farzana Dorin<sup>1</sup>; Mohammad Wahid  
9  
10 4 Ahmed<sup>1</sup>, Md. Mehedi Hasan<sup>4</sup>, Shaikh Mehdi Hasan<sup>1</sup>, Mohammad Touhidul Islam<sup>5</sup>, Jahangir A. M.  
11  
12 5 Khan<sup>2,6</sup>  
13  
14  
15 6

16  
17  
18 7 **Affiliation:** <sup>1</sup>) Health Systems and Population Studies Division, icddr,b, Dhaka, Bangladesh;

19  
20 8 <sup>2</sup>) Department of Learning, Informatics, Management and Ethics (LIME), Karolinska  
21  
22 9 Institutet, Stockholm, Sweden  
23

24  
25 10 <sup>3</sup>) Department of Social Policy, London School of Economics and Political Science, London,  
26  
27 11 United Kingdom  
28

29 12 <sup>4</sup>) Institute for Social Science Research, University of Queensland, Queensland, Australia  
30

31 13 <sup>5</sup>) World Health Organization Bangladesh, Dhaka, Bangladesh  
32

33 14 <sup>6</sup>) Liverpool School of Tropical Medicine, Liverpool, U.K.  
34  
35  
36 15

37  
38 16 **\*Corresponding author**

39  
40 17 Sayem Ahmed, MHE, MS  
41

42  
43 18 Postal address: Health Systems and Population Studies Division, icddr,b,  
44

45 19 68 Shahid Tajuddin Ahmed Sharani, Mohakhali, Dhaka-1212, Bangladesh.  
46

47  
48 20 Cell. +8801912522643 Fax +88-02-8811568 E-mail address: [sayemahmed@icddr.org](mailto:sayemahmed@icddr.org)  
49

50 21

51  
52 22 **Word count:** 3,331  
53

54 23 **Keywords:** Technical efficiency, Data envelopment analysis, Asian countries, Health  
55  
56 24 systems.  
57  
58  
59 25

## 26 ABSTRACT

27 **Objective:** This study aims to estimate the technical efficiency of health systems in Asia.

28 **Settings:** The study was conducted in Asian countries.

29 **Methods:** We applied an output-oriented data envelopment analysis (DEA) approach to estimate the  
30 technical efficiency of the health systems in Asian countries. The DEA model used as input variable  
31 per-capita health expenditure (all healthcare resources as a proxy) and as output variables cross-country  
32 comparable health outcome indicators (e.g. HALE at birth and infant mortality per 1,000 live births).  
33 Censored Tobit regression and smoothed bootstrap models were used to observe the associated factors  
34 with the efficiency scores. A sensitivity analysis was performed to assess the consistency of these  
35 scores.

36 **Results:** The main findings of this paper demonstrate that about 87% of the studied Asian countries  
37 were inefficient with respect to using healthcare system resources. Most of the efficient countries  
38 belonged to the high-income group (Cyprus, Japan, and Singapore) and only one country belonged to  
39 the lower-middle-income group (Bangladesh). In Asia, through efficiency gains, the high-, upper  
40 middle-, lower-, and lower- middle-income countries can improve health system outcomes by 6.6%,  
41 8.6%, and 8.7% respectively using the existing level of resources. Population density, bed density, and  
42 primary education completion rate significantly influenced the efficiency score.

43 **Conclusion:** The results of this analysis show inefficiency of the health systems in most of the Asian  
44 countries and imply that many countries may improve their health system efficiency using the current  
45 level of resources. The identified inefficient countries could pay attention to benchmarking their health  
46 systems within their income group or other similar types of health systems.

### 47 **Strengths and limitations of this study:**

- 48 • Data envelopment analysis was used to determine the extent of inefficiency in health systems  
49 across Asia.
- 50 • We extracted health systems level indicators from the widely used World Bank World  
51 Development Indicators database and the World Health Organization Open Data Repository.
- 52 • Due to data unavailability, we used health system outcomes in addressing the health systems  
53 efficiency rather than true health system output.

## 54 BACKGROUND

55 In Asia, there are approximately 4.4 billion people spread across highly diverse countries, from  
56 economic powerhouses like China and Singapore to poorer economies such as Laos, Cambodia, and  
57 Myanmar (1). Overall, the continent is often cited as the fastest-growing and most dynamic region in  
58 the world. Over the past number of years, Asian societies have also made impressive progress in  
59 ensuring better healthcare services, especially those targeted towards improving maternal and infant  
60 health and increasing life expectancy (2). However, whether economic gains have translated to efficient  
61 health systems across the region is still not well studied.

62 It is important that the healthcare resources in Asia are used efficiently. In Asia, generally government  
63 spending on healthcare is low compared to total health expenditure and it is often not focused on those  
64 who need it most (3). For example, in the South Asia region governments spend 31% of total health  
65 expenditure, which is about one percent of gross domestic product (GDP) (4,5). In many Asian  
66 countries, personal health expenses or out-of-pocket payments are a major cause of poverty (1,6). For  
67 instance, from a study of 11 Asian countries, it was found that high levels of out-of-pocket healthcare  
68 spending have pushed 78 million people into poverty annually (7). Aging populations and non-  
69 communicable diseases that are often preventable but expensive to treat (e.g. diabetes and cancers  
70 linked to tobacco) impose and will continue to impose heavy costs on households and public health  
71 budgets. Moreover, a major challenge for Asian countries is the control and prevention of different  
72 communicable diseases (e.g. HIV/AIDS, tuberculosis, and polio) due to the movement of people across  
73 borders and the exchange of goods (8).

74 In light of this, it is very important that the health systems of these countries are efficient in using their  
75 resources. The World Health Organization (WHO) has estimated that about 20% to 40% of total  
76 healthcare resources are being wasted per year among the WHO member countries due to inefficiency.  
77 Furthermore, this rate is higher in low-and-middle income countries (LMICs) (9). In Asia, the variation  
78 in efficiency across income groups, and contexts can perhaps lead to lessons learned in addressing it.  
79 In order to address inefficiency, Asia's health systems can look toward different dimensions of  
80 performance such as their effectiveness, efficiency, access, equity, and quality (10). A great deal of  
81 practitioner and academic literature have analyzed the relationship between the efficient production of

1  
2  
3 82 health services and universal health coverage as well as the widespread importance of measuring  
4  
5 83 overall health system performance (9,11).  
6

7 84 Assessing the efficiency of healthcare systems is a difficult process as analyses often encounter  
8  
9 85 methodological problems, particularly due to the need for appropriate and valid outcome indicators  
10  
11 86 (12). Despite the empirical difficulties in applying efficiency concepts to health systems, efficiency can  
12  
13 87 be measured on both micro and macro levels (13). Measuring health system efficiency at a macro-level  
14  
15 88 is particularly important in order to understand health system performance across the globe and take  
16  
17 89 required action to minimize inefficiency (11,14).  
18

19  
20 90 A number of studies have analyzed the healthcare efficiency in the Americas (15,16), Western Europe  
21  
22 91 (17,18) and Asia (19,20) to shed light on the efficiency of different national healthcare systems. A  
23  
24 92 systematic review on measuring efficiency related to several aspects of healthcare performed by  
25  
26 93 Hollingsworth et al. (21). Dimas et al. evaluated the productivity of Greek public hospitals and found  
27  
28 94 that productivity changes were dominated by technical change (22). Additionally, Zere et al. 2005  
29  
30 95 measured the technical efficiency and productivity of hospitals in South Africa, and examined the  
31  
32 96 impact of hospital characteristics on efficiency and productivity (23).  
33

34  
35 97 Several studies have reported on different determinants of health system efficiency. For example, a  
36  
37 98 study conducted in China reported that GDP per capita, proportion of primary health worker, and  
38  
39 99 population density were the key determinants of the efficiency in Chinese health system (24). Another  
40  
41 100 study in the Canadian context reported that re-admission, obesity and smoking, and average income of  
42  
43 101 the population are key determinants of health system efficiency (25).  
44

45 102 In an international study of efficiency in 170 Asian and non-Asian countries, it was observed that Asian  
46  
47 103 countries were comparatively in the middle with respect to health system efficiency scores (26). This  
48  
49 104 indicates that there is room for improvement to optimize health benefits from the available health sector  
50  
51 105 resources. In this region, there are a number of studies at the country level to address health systems  
52  
53 106 efficiency (27,28), but cross country comparison of the health system efficiency is limited (29).  
54

55  
56 107 Asian countries are not homogenous in terms of area, population, and economic conditions, however,  
57  
58 108 they have public health functions and a number of their health system outcomes in common (30). Many  
59  
60 109 of the countries share similar health systems problems, including and a high burden of diseases due to

1  
2  
3 110 the geographical contiguity, disease patterns, and social conditions and inadequate resources for  
4  
5 111 healthcare. Understanding health systems efficiency in different Asian countries could promote shared  
6  
7 112 learning and highlight key areas of best practice, as well as areas where improvement is needed.  
8  
9 113 Furthermore, given geographical proximity and many strong relationships experienced with near-by  
10  
11 114 countries, there is likely to be relative ease in the ability to practically understand, learn, and apply  
12  
13 115 nuance about healthcare systems from one country to another.  
14  
15 116 A study of the efficiency of health systems in this region will help to provide lessons through  
16  
17 117 comparison across countries. This paper aims to achieve this goal through evaluating the technical  
18  
19 118 efficiency and scale efficiency of the healthcare systems of selected Asian countries.  
20  
21  
22  
23

119

## 120 **METHODS**

121 This study employed two stages of efficiency analysis using cross sectional data. In the first stage,  
122 Data Envelopment Analysis (DEA) was used to estimate the country efficiency scores. In the second  
123 stage, a regression analysis and a bootstrap method were employed to identify the factors associated  
124 with the health system efficiency. The software package STATA 13 was used for all of the analyses.

125

### 126 **Data sources**

127 We used two main data sources: The World Health Organization data repository (31) and World  
128 Development Indicators-2015 (WDI). According to the list of United Nation Statistics Division, there  
129 are 50 Asian countries and territories. Among these , 46 were used for this study (32). Four countries  
130 and territories (Hong Kong, North Korea, Macao, and West bank and Gaza) were excluded due to  
131 missing data of selected variables in the WDI database (5). However, selected variables for the study  
132 countries were not reported in WDI for every year. This problem is unavoidable in studies based on  
133 WDI data (33–35). Earlier studies adapted two approaches to deal with such problem. Firstly, they used  
134 a value from a slightly earlier year as in Anderson et al. (33) and secondly, they used a smaller number  
135 of countries in the model as in Fare et al. (34) and Grubaugh and Santerre (35). Given the importance  
136 of including as many countries as possible to study technical efficiency using Data Envelope Analysis,



1  
2  
3 137 we opted for the first approach. However, to avoid missing variable we used slightly earlier WDI  
4  
5 138 statistics.

6  
7 139

8  
9 **140 Input and output variables**

10  
11 141 A main assumption of the DEA model used in our analysis was that in Asian countries, the selected  
12  
13 142 health outcomes are dependent on the inputs of healthcare resources. We selected the input variables as  
14  
15 143 proxies for the quantity of inputs that a country devotes to healthcare (i.e. health expenditure per capita);  
16  
17 144 and outcome variables as the healthy life expectancy at birth (HALE) and infant mortality (per 1,000  
18  
19 145 live births). The health expenditure per capita was extracted from the Global Health Expenditure  
20  
21 146 database managed by the WHO. In this database there are national health expenditure statistics for more  
22  
23 147 than 190 WHO Member States in line with the new System of Health Accounts 2011 (SHA 2011)  
24  
25 148 framework. The SHA 2011 framework was developed by Organisation for Economic Co-operation and  
26  
27 149 Development (OECD) to rigorously track health expenditure (e.g. by all financial sources, by all  
28  
29 150 services) at the national level and to enable comparability across countries. The capital expenditure (e.g.  
30  
31 151 infrastructure) was included in the total health expenditure estimation (31). The relationship between  
32  
33 152 health expenditure and outcomes considered here is consistent with the view that health expenditure  
34  
35 153 has diminishing returns, or additional expenditure beyond a certain level has relatively smaller  
36  
37 154 incremental effect on life expectancy or infant mortality (36). To be clear, reduction in infant mortality  
38  
39 155 and increase in life expectancy signify improvement in the health outcomes of a country. Some studies  
40  
41 156 have included life expectancy at birth as an outcome variable (37–39), however, it is argued that quality  
42  
43 157 of life matters as much as, if not more than, quantity of life, and therefore life expectancy should be a  
44  
45 158 weighted health quality measure. As a result, HALE has been incorporated as a proxy of health quality  
46  
47 159 as the outcome of health systems. Also, it is important to note that instead of using the infant mortality  
48  
49 160 directly in the DEA model, we used the inverse of infant mortality as the model assumes that inputs and  
50  
51 161 outputs are isotonic (i.e. increased input reduces efficiency as well as increased output increases  
52  
53 162 efficiency) (40). Without this correction, a higher infant mortality figure would have been said to  
54  
55 163 incorrectly contribute to a better health system outcome.  
56  
57  
58  
59  
60

### 165 **Data envelopment analysis**

166 DEA is a widely used non-parametric method that identifies an efficiency frontier by using linear  
167 programming techniques and the distance of each decision-making unit (DMUs) to the frontier. Of the  
168 two types of efficiency analysis approach namely DEA and Stochastic Frontier Analysis (SFA) we  
169 choose DEA. The key advantage of the DEA approach in this analysis is that it can incorporate multiple  
170 inputs and outputs which are measured in different units.

171 One type of DEA model, developed by Charnes, Cooper, and Rhodes (CCR), assumes that production  
172 has constant returns to scale (CRS), meaning any change in the input will result in a proportionate  
173 change in the output (41). Another model proposed by Banker, Charnes, and Cooper (BCC), assumes  
174 that production has variable returns to scale (VRS) implying an increase in the input will result in either  
175 an increase or a decrease in the output. The latter methodology is particularly useful for this study since  
176 it aims to measure the efficiency related to organizational units (i.e. the health systems of the different  
177 countries), which use numerous resources to produce multiple outputs and accommodate a more flexible  
178 assumption of VRS (26,42). This is more realistic and reflective of changes in the real world (27).

179 We measured scale efficiency to see whether the health systems of Asian countries are operating at their  
180 optimal sizes or not (43). The size of health systems is a major political decision in Asian countries. To  
181 some extent, it depends on how the policymakers or government are prioritizing health among other  
182 competing public services (e.g. education, military, electricity) (44). Scale efficiency scores provide  
183 information on the optimality of a DMU size, in this case the health system of a country. When a  
184 production unit (DMU) operates at CRS, technical efficiency is equal to scale efficiency. However,  
185 when DMUs are not operating at optimum scale, technical efficiency measured with the CCR model  
186 may be altered by scale efficiency. The BCC model, which defines production through VRS, can  
187 incorporate the impact of scale efficiency in the measurement of technical efficiency. The scale  
188 efficiency is measured as the ratio of CRS technical efficiency scores and VRS technical efficiency  
189 scores (45).

190 When it comes to DEA studies comparing countries, both the input- and output-oriented models have  
191 been adopted for this type of analysis. An output-oriented DEA model aims to maximize the outputs

1  
2  
3 192 with a given amount of inputs; while input-oriented models focus on minimizing the inputs used to  
4  
5 193 obtain a certain amount of output. Many studies have been carried out using DEA to assess the  
6  
7 194 efficiency of healthcare systems using the two approaches in both high-income and low-income  
8  
9 195 countries (28,46–48). In this study, an output-oriented DEA model was deemed more appropriate based  
10  
11 196 on the premise that the input per capita expenditure is likely to be less flexible. In other words, health  
12  
13 197 system stewards are likely to have more leverage in controlling outputs through innovative  
14  
15 198 programming and improvements in healthcare provided, rather than by increasing spending and  
16  
17 199 resources.

20  
21  
22

### 201 **Output oriented model**

202 The output-oriented technical efficiency model focuses on increasing output without changing the  
203 quantity of inputs used. The objective of the model for solving each particular DMU (health system) is  
204 to maximize the efficiency score (denoted by  $\phi$ ) meaning the amount by which all outputs can be  
205 improved for each country's health system under consideration while holding input constant.

206 The output-oriented DEA model is specified as follows.

$$207 \quad \text{Max } \phi = \sum O_r Y_{rj_0} + O_0$$

208 Subject to constraints

$$209 \quad \sum_{i=1}^m V_i + X_{ij_0} = 1$$

$$210 \quad \sum_{r=1}^s O_r + Y_{rj} - \sum V_r X_{ij} + O_0 \leq 0, \quad j = 1, \dots, n$$

$$211 \quad O_r, V_i \geq 0$$

$$212 \quad O_0 > 0, \text{ or } O_0 = 0 \text{ or } O_0 < 0$$

213 Where,

214  $Y_{ij}$  = amount of output r from country j,

215  $X_{ij}$  = amount of input i to country j,

216  $O_r$  = weight given to output r,

1  
2  
3 217  $V_i$  = weight given to input  $i$ ,

4 218  $n$  = number of countries,

5 219  $s$  = number of outputs,

6 220  $m$  = number of inputs.

7  
8 221  $O_0 > 0$  defines increasing returns to scale,  $O_0 = 0$  defines constant returns to scale, and  $O_0 < 0$  defines  
9 222 decreasing returns to scale.

10 223 The technical efficiency scores is defined by  $\phi$  and it ranges between 0.00 and 1.00, If it is equal to  
11 224 1.00, then the production from the DMU is efficient; while if it is less than 1.00, the DMU is inefficient.

12 225

### 13 226 **Explaining efficiency through regression analysis**

14 227 One of the limitation of the DEA approach is the serial correlation of the efficiency scores generated  
15 228 through this approach. In other words, the correlation between inputs and outputs, and consequently  
16 229 with the estimated efficiency scores resulted in this serial correlation. Thus, the scores of one DMU is  
17 230 not independent on that of the other DMUs. To handle this limitation, scholars such as Ramalho et al.  
18 231 2010 (49) and McDonald 2009 (50) have argued that econometric models like probit, logit, and  
19 232 truncated regression (Tobit) can be used for second- stage analysis for identifying impact of  
20 233 environmental variables on efficiency. However, scholars such as Simar and Wilson 2007 have argued  
21 234 that the conventional statistical inferences are inappropriate in the second-stage regression due to the  
22 235 bias of the DEA score and recommend using bootstrap methods (51). Afonso and Aubyn 2011 (52)  
23 236 show in their empirical study that the censored normal Tobit regression and bootstrap algorithms yield  
24 237 very similar results. However, we have adopted both the Tobit model and smoothed bootstrap model in  
25 238 explaining the association with health system efficiency to be comprehensive.

26 239 The VRS efficiency scores computed using the DEA model were regressed against a few health  
27 240 service productions (e.g. physician and beds density per 1000 population) and some environmental  
28 241 factors (Table 1). Since, by definition, the DEA scores range between zero and one, and some of the  
29 242 data tend to concentrate on these boundary values (i.e. censored for the DMUs with a value at one),  
30 243 ordinary least squares cannot estimate the regression. Therefore, a Tobit model is suitable for such  
31 244 regression. For the convenience of calculation, we assumed a censoring point at zero in this model. As  
32 245 a result, the efficient DMUs will have a score of zero and the inefficient DMUs will have score

greater than zero. Following Zere et al. (53), we applied this method by transforming VRS technical efficiency scores into VRS inefficiency scores and leaving censoring at zero as follows.

$$\text{Inefficiency score} = \left( \frac{1}{\text{VRS technical efficiency score}} \right) - 1$$

The Tobit regression model used variables representing access to healthcare and health status. Guided by several similar studies, physician density (the number of physicians per 1,000 population) and bed density (the number of inpatient beds per 1,000 population) were selected as determinants of access to healthcare (35,54). In addition to health care, the health status of individuals is determined by the lifestyle and behaviors, therefore we also included two environmental factors as determinants of efficiency, namely smoking prevalence among adult male (percentage of adults) and primary education completion rate of relevant age group. The relevant age group for the primary completion rate is defined as the number of new entrants (enrolments minus repeaters) in the last grade of primary education (regardless of age); divided by the population at the entrance age for the last grade of primary education of a country (55). The adverse health effect of smoking consequently affects health outcomes and also the health system efficiency (25,52,56). Education is found to be an important factor in determining individual health status. Higher educational attainment is associated with higher income which in turn secures a healthy living environment and access to healthcare (57). Additionally, we included population density (population living per square kilometre of land area) as the control of efficiency. This is because population density can affect the quality of healthcare services.

The Tobit regression models were specified as follows,

$$\text{Ineff}_i = \beta_0 + \beta_1 \text{Phy}_i + \beta_2 \text{Beds}_i + \beta_3 \text{Primay_edu}_i + \beta_4 \text{Smoking}_i + \beta_5 \text{Inc}_i + \beta_5 \text{Pop_density}_i + \varepsilon_i$$

Where,

Ineff = the technical inefficiency score; continues variable.

Phy = Physician density; categorical variable (1= Fewer than 1 physician; 2= 1-2 physician, 3= More than 2 physician)

1  
2  
3 271 Beds =Beds density; categorical variable (1= Fewer than 1 beds 3= More than 1 and less than or equal  
4  
5 272 to 3 beds, 3= More than 3 and less or equal to 5 beds, 4= More than 5 beds)  
6  
7 273 Inc= Income group of the country; categorical variable (1=Low income, 2=Lower-middle income,  
8  
9 274 3=Upper-middle-income, 4=High-income)  
10  
11 275 Pop\_density= Population density; categorical variable (1= Fewer than or equal to 50, 2= More than 50  
12  
13 276 to fewer than or equal to 100, 3= More than 100 to fewer than or equal 200, 4= More than 200)  
14  
15 277 Finally,  $\varepsilon_i$  was the stochastic error term.

16  
17  
18 278 We submitted the initial DEA scores in a smoothed bootstrap method design by Simar and Wilson  
19  
20 279 (51) to estimate the robust efficiency score from the bootstrapped regression analysis to identify  
21  
22 280 factors associated with these scores. The simarwilson command in STATA 13 was applied in the  
23  
24 281 analysis using externally estimated DEA scores (algorithm #1) (58).

### 25 26 282 **Sensitivity analysis**

27  
28 283 The efficiency scores can be affected by the number of inputs and outputs used in DEA in relation with  
29  
30 284 the number of DMUs. The scores can be overestimated if the number of DMUs is relatively small  
31  
32 285 compared to the number of inputs, or very large compared to the number of inputs and outputs (59,60).  
33  
34 286 It is suggested that the number of DMUs should be at least three times of the inputs and outputs variables  
35  
36 287 (61,62). In our model, the number of DMUs (46) is more than three times of the number of inputs and  
37  
38 288 outputs (9) and this is not a binding constraint for this study.

39  
40  
41 289 There is the possibility that choosing different variables in the DEA model may produce inconsistent  
42  
43 290 results such as inconsistent efficiency estimate. There is no test to assess the suitability of a particular  
44  
45 291 model specification in DEA (63). Therefore, we carried out a sensitivity analysis of the efficiency scores  
46  
47 292 by running the DEA model several times using different combinations of input and outcome variables.  
48  
49 293 Different specifications of the DEA models were considered (e.g. dropping the efficient countries, using  
50  
51 294 HALE at age 60, current health expenditure per capita (current US\$) as inputs and using the complete  
52  
53 295 set of data for the year 2015 (excluding countries with any missing variable) for testing the sensitivity  
54  
55  
56 296 of our main model.

57  
58  
59 297  
60

## 298 Patient and Public Involvement

299 The study used secondary data from WHO and WDI databases. No patients were involved in this study.  
300 Study findings will be shared with the stakeholders, including local community groups in community  
301 meetings and at national or regional conferences.

## 302 RESULTS

303 The descriptive statistics of the selected input, outcome, and environmental variables are shown in Table  
304 1. The health expenditure per-capita ranges from a minimum of 88.03 USD (Bangladesh) to a maximum  
305 of 4,405.13 USD (Japan) with a mean, median, and standard deviation of 1,133.71, 663.94, and 1,157.72  
306 respectively. The number of physicians per 1,000 people ranges from a minimum of 0.1 at Timor-Leste  
307 to maximum 4.8 at Georgia. However, the number of inpatient beds per 1,000 people is the smallest in  
308 Iran (0.1) and the highest in Japan (13.7). The average smoking prevalence of the adult male people  
309 among the studied countries is 42.2 and average primary education completion rate is 96.5% of the  
310 relevant age group.

311 Table 1. Descriptive statistics of input and output variables

| Characteristics/ description                             | Mean     | Median | SD*      | Minimum | Maximum  | Source |
|----------------------------------------------------------|----------|--------|----------|---------|----------|--------|
| <b>Input variable</b>                                    |          |        |          |         |          |        |
| Health expenditure per capita, PPP                       | 1,133.71 | 663.94 | 1,157.72 | 88.03   | 4,405.13 | WDI    |
| <b>Outcome variables</b>                                 |          |        |          |         |          |        |
| Healthy life expectancy at birth (years)                 | 64.29    | 65.2   | 5.1      | 53.2    | 75.9     | WHO    |
| Infant mortality (per 1,000 live births)                 | 19.9     | 13.9   | 15.8     | 2.0     | 65.7     | WDI    |
| <b>Explanatory variables for Tobit model</b>             |          |        |          |         |          |        |
| Physicians (per 1,000 people)                            | 1.6      | 1.6    | 1.1      | 0.1     | 4.8      | WDI    |
| Hospital beds (per 1,000 people)                         | 2.9      | 2.1    | 2.7      | 0.1     | 13.7     | WDI    |
| Smoking prevalence, males (% of adults)                  | 42.2     | 42.2   | 10.5     | 18.9    | 71.8     | WDI    |
| Primary completion rate, total (% of relevant age group) | 96.5     | 97.9   | 11.4     | 66.7    | 116.5    | WDI    |

312 \*Standard deviation

313 Among the countries analyzed, HALE at birth was a minimum of 53.2 years in Afghanistan and a  
314 maximum of 75.9 years in Singapore. The infant mortality rate ranged from 2.1 deaths per 1,000 live  
315 births in Japan to 68.1 deaths per 1,000 live births in Afghanistan. On average, there were 21.1 deaths



1  
2  
3 316 per 1,000 live births in the studied countries. The scatter matrix of the input and output variables shows  
4  
5 317 that inputs, for instance, increase in per-capita healthcare expenditure was associated with improved  
6  
7 318 health outcomes (e.g. HALE at birth and reduced infant mortality) (Figure 1).  
8

9 319

10  
11 320 (Figure 1. will be inserted here)  
12

13  
14 321

15  
16 322 The mean CRS and VRS technical efficiency scores were 0.780 and 0.921 respectively (Table 2).  
17  
18 323 Whereas, the mean scale efficiency score was 0.874. Considering VRS efficiency, Afghanistan has the  
19  
20 324 lowest score of 0.812. Both VRS and CRS technical efficiency score were positively correlated with  
21  
22 325 per capita health expenditure, HALE at birth, and negatively correlated with infant mortality  
23  
24 326 (supplementary table 1).  
25

26  
27 327 Out of 46 countries studied, only 4 (8.7%) countries showed the maximum level of (efficiency score  
28  
29 328 1.00) in VRS and CRS technical efficiency scale. All of these four countries showed scale efficiency of  
30  
31 329 1.00 implying that these countries created the best practice frontier based on their input and output  
32  
33 330 combinations. 39.1% (18) countries showed increasing returns to scale, 52.2% (24) countries decreasing  
34  
35 331 returns to scale, and the 4 efficient countries constant returns to scale production function of their health  
36  
37 332 systems.  
38

39  
40  
41 333

42  
43 334 (Table 2. will be inserted here)  
44

45  
46 335

47  
48 336 More than half of the countries (30 countries) had VRS efficiency and five countries CRS efficiency  
49  
50 337 greater than 90% (supplementary figure 1).  
51

52 338

### 53 54 339 **Result from Tobit regression and bootstrap analysis for associated factors with the inefficiency**

55  
56 340 Tobit regression and smoothed bootstrap were used to relate VRS efficiency scores to two health service  
57  
58 341 production variables and four environmental variables in two separate models (Table 3). Negative  
59  
60



1  
2  
3 342 associations with the inefficiency scores in the Tobit model represent positive relation of health system  
4  
5 343 efficiency with the explanatory variables. On the other hand, positive associations with the explanatory  
6  
7 344 variables in the smoothed bootstrap model represent positive relations of the health system efficiency  
8  
9 345 with the explanatory variables.  
10

11 346

12  
13  
14 347 (Table 3. will be inserted here)  
15

16 348

17  
18 349 Physician density, income status of countries, and smoking prevalence among males exhibited  
19  
20 350 statistically insignificant associations with the health system efficiency in the both models. The density  
21  
22 351 of bed ( $>3$  and  $\leq 5$ ) had a significantly negative association with the inefficiency scores (i.e. positive  
23  
24 352 association with the efficiency) compared to less than 1 bed density category. Countries having more  
25  
26 353 than 1 and less than or equal to 3 beds density had no significant association with the inefficiency scores.  
27  
28 354 However, after the bootstrapping, this category become significant and the significance level increased  
29  
30 355 for the rest two categories (i.e. more than 3 and less than or equal to 5 bed density and more than 5 bed  
31  
32 356 density). The association of beds density in the both models indicates that sample countries with less  
33  
34 357 than 1 bed density have lower technical efficiency of its health systems. Furthermore, the primary  
35  
36 358 education completion rate was significantly negatively associated with the inefficiency score in the  
37  
38 359 Tobit model which indicates that countries with higher percentage of primary education completion rate  
39  
40 360 have higher health system efficiency. Similar association was observed in the bootstrap model. In case  
41  
42 361 of population density, we found in the both models that countries having more than 200 population per  
43  
44 362 square kilometre were more efficient in their health system efficiency compared to the countries with  
45  
46 363 less than or equal to 100 population per square kilometre.  
47  
48  
49

50 364

### 51 365 **Sensitivity of the efficiency scores**

52  
53 366 We conducted sensitivity analysis using various combinations of input and output variables. In all of  
54  
55 367 these cases the average of the efficiency scores varied from 0.812 to 0.936. The most sensitive  
56  
57 368 combination was found while using the HALE at age 60 as the outcome variable. The efficiency score  
58  
59 369 changed from 0.919 (main model) to 0.812 (considering input as HALE at age 60) (Figure 2).  
60

370

371

(Figure 2. will be inserted here)

372

373

In Table 4, mean efficiency scores are presented by the income categories of the countries. The highest mean VRS technical efficiency were observed for high income countries (0.934; 95% CI 0.905-0.963), followed by upper-middle-income (0.914; 95% CI: 0.894-0.935), and low and lower-middle income countries (0.913; 95% CI: 0.891-0.935). If all the health systems operated at maximum efficiency at their given input level, the high-, upper middle-, low- and lower-middle income countries could improve their health system outcome (e.g. HALE at birth and reduce infant mortality) by 6.6%, 8.7%, and 8.7% respectively.

380

## 381 DISCUSSION

382

The main findings of this paper demonstrated that about (86.9 %) of the studied Asian countries are technically inefficient with respect to using healthcare systems resources, (using a proxy of per capita health expenditure). The study findings showed that the most efficient countries belonged to the high-income group (Cyprus, Japan, and Singapore). Only one country belonged to the low- and lower middle income group (Bangladesh). Among the 46 countries studied, only four countries (Bangladesh, Japan, Singapore, and Cyprus) showed constant returns to scale efficiency, indicating that they were operating at their most efficient level. Of the 14 high-income countries studied, 9 countries (75.0%) had health system production at decreasing returns to scale. This implies that although the highest number of efficient countries belonged to the high-income group, a large number of these countries health system production had more resources than the ideal situation. A similar situation was observed for the upper-middle-income countries. Of the 13 countries, 10 (76.9%) had decreasing returns to scale. Only 5 (23.8%) out of 21 low – and lower-middle-income countries were producing at decreasing returns to scale. Although these low- and lower-middle-income countries are not efficient, most of their production follows increasing returns to scale.

395

1  
2  
3 396 It was observed that the average of the efficiency scores increased from the low and lower-middle-  
4  
5 397 income countries to high-income countries. An important policy implication of this study could be that  
6  
7 398 the technically inefficient low-income countries on average can improve their health systems outcome  
8  
9 399 by 8.7%, middle income country by 8.6%, and high income country by 6.6% using the existing levels  
10  
11 400 of per-capita health expenditure. An international study found a similar conclusion that health systems  
12  
13 401 performance is most efficient in the developed countries, according to simple efficiency scores (64).  
14  
15

16 402 The overall healthcare efficiency in different countries varied considerably (65,66). Among the low-  
17  
18 403 and lower-middle income studied, one country demonstrated the most efficient health systems  
19  
20 404 (Bangladesh). This county has both technical and scale efficient health systems, like the high-income  
21  
22 405 countries (Japan, Singapore, and Cyprus) (67). A possible reason for the high efficiency of these LMICs  
23  
24 406 could be a focus on infant mortality and child health as prioritized in past Millennium Development  
25  
26 407 Goals and in current Sustainable Development Goals agendas, which relates to the outcome variables  
27  
28 408 used in this study.  
29  
30

31 409 The DEA result showed that more than 60% of the low- and lower middle income countries had health  
32  
33 410 system efficiency greater than 90%. This result implies that these countries produce good health at low  
34  
35 411 cost and therefore make good use of health systems resources (68). This result suggests that it is possible  
36  
37 412 for countries to have a high-efficiency score with poor health outcomes because of their low expenditure  
38  
39 413 on resources and increasing returns to scale production function. In other words, given their moderate  
40  
41 414 consumption of inputs and challenging social environments, these countries can achieve good health  
42  
43 415 outcomes, relative to the other countries. Similar findings were observed for Mexico and Turkey relative  
44  
45 416 to other countries in a study of the OECD countries (39). It should be noted that this study only used  
46  
47 417 per-capita health expenditure and there are other factors that influence health outcomes as well. For  
48  
49 418 example differences in life expectancy and infant mortality between populations can be due to lifestyles,  
50  
51 419 preferences (56,69,70) social class, occupation (71) and environmental factors (72,73). On a more  
52  
53 420 macroscopic level, the results could also be impacted by a variety of contextual factors among countries  
54  
55 421 such as different political institutions, economic landscapes, health-seeking behaviour patterns and  
56  
57 422 burden of diseases among other things. However, in this study, we attempted to address by including  
58  
59  
60

1  
2  
3 423 variables addressing the number of physicians, number of inpatient beds, and population density, along  
4  
5 424 with two environmental factors namely primary completion rate of relevant age group and smoking  
6  
7 425 prevalence among the adult male population to take into consideration some of this variation. The  
8  
9 426 results showed that more than three and less than five beds per 1000 population significantly influenced  
10  
11 427 the efficiency score. A low number of beds cannot serve a large proportion of the population and  
12  
13 428 therefore the systems may be inefficient. Similarly, a high number of beds may often be left unused and  
14  
15 429 make the health systems inefficient. The countries having more than 200 people living per square  
16  
17 430 kilometre had a higher level of efficiency in their health systems.  
18  
19  
20 431

21  
22 432 A limitation of DEA methodology is that it works in a deterministic way, meaning that the results  
23  
24 433 entirely depend on the numeric values in the dataset. As the DEA approach compares DMUs, the  
25  
26 434 number and nature of DMUs in the data set can noticeably change the results. For example, if a more  
27  
28 435 efficient country is added to the dataset, it would move the frontier, causing some of the efficiency  
29  
30 436 scores of other countries to fall. This is a key aspect of the methodology used.  
31  
32

33 437 Additionally, it is important to note that the use of a different set of variables might have generated  
34  
35 438 different conclusions. In the future, if additional data become available for a larger number of countries  
36  
37 439 in the region, the number of variables analyzed could be increased to include an understanding with a  
38  
39 440 greater degree of complexity in health system efficiency.  
40  
41

42  
43 441 Another data limitation is the comparability of health expenditures among the Asian countries. While  
44  
45 442 recognizing that it is not possible to solve the inherent issues, we made an attempt to minimize it. Since  
46  
47 443 the actual amount of healthcare expenditure across different countries may not be comparable due to  
48  
49 444 the difference in purchasing power parity across countries, we used health expenditures as constant of  
50  
51 445 2011 in PPP as an input in the DEA model (39). Also, when we included health expenditure at current  
52  
53 446 USD per capita as an input in the DEA model we found that the efficiency score did not change  
54  
55 447 significantly.  
56  
57  
58  
59  
60

1  
2  
3 448 We applied sensitivity analysis in an attempt to overcome these limitations (Figure 2.) Our results were  
4  
5 449 consistent while using several combinations of inputs and outputs variables which is reassuring and  
6  
7 450 strengthens the findings from this study.  
8  
9

10 451

## 13 452 **CONCLUSIONS**

15 453 This study provides an empirical picture of the technical efficiency of the healthcare systems of 46  
16  
17 454 Asian countries. It found that inefficiency exists in the healthcare systems of most of the countries  
18  
19 455 studied, however, the results point to three high-income and one lower-middle-income country which  
20  
21 456 efficiently used healthcare systems resources. The interpretation of the inefficient countries identified  
22  
23 457 through this study is that they can improve health outcomes using the current level of per-capita health  
24  
25 458 expenditure. These countries could use these results to direct their attention to benchmarking their  
26  
27 459 health systems within their regional or another comparative group in order to understand their health  
28  
29 460 system performance in a more detailed way. This study addresses the need to understand efficiency  
30  
31 461 issues, as well as potentially identify good examples of countries which efficiently allocate and use  
32  
33 462 resources to make their healthcare systems more technically efficient. It narrows a gap in the literature  
34  
35 463 as there are few countries studying healthcare efficiency in Asia and looking comparatively in this  
36  
37 464 manner.  
38  
39

## 41 465 **Acknowledgement**

43  
44 466 icddr,b is thankful to the Governments of Bangladesh, Canada, Sweden and the UK for providing  
45  
46 467 core/unrestricted support. The authors would like to thank The World Bank for providing open access  
47  
48 468 to the World Development Indicators database and the World Health Organization for their data  
49  
50 469 repository.  
51

52 470

53 471

## 56 472 **Contributors**

1  
2  
3 473 SA, MZH and MM contributed to conceptualizing the research idea, study design, literature search,  
4  
5 474 data extraction and analysis, data interpretation, and writing the manuscript. MWA FD, SMH, MMH,  
6  
7 475 MTI and JAMK contributed to writing, reviewing and revising the manuscript. All authors read and  
8  
9 476 approved the final manuscript.

### 11 477 **Funding**

14 478 There are no funders to report for this submission.

### 16 479 **Competing interest**

18 480 None declared.

### 20 481 **Data sharing statement**

23 482 Data were extracted from the World Bank Open Data repository for the “World Development  
24 483 Indicators’ and from World Health Organization Global Health Observatory data. The  
25 484 following links was used to extract the excel format of the indicators:  
26 485 <https://data.worldbank.org/> and <http://www.who.int/gho/en/>.  
27 486

487 **REFERENCES**

- 488 1. Melorose J, Perroy R, Careas S. World population prospects. United Nations.  
489 2015;1(6042):587–92.
- 490 2. Asandului L, Roman M, Fatulescu P. The Efficiency of Healthcare Systems in Europe: A Data  
491 Envelopment Analysis Approach. *Procedia Econ Financ.* 2014;10(14):261–8.
- 492 3. Organization WH. Health at a Glance: Asia/Pacific 2014 Measuring Progress towards  
493 Universal Health Coverage: Measuring Progress towards Universal Health Coverage. OECD  
494 Publishing; 2014.
- 495 4. Vargas V, Begum T, Ahmed S, Smith O. Bangladesh – Fiscal space for health : Toward the  
496 Fiscal Space for Health in Bangladesh. Washington D.C.; 2016.
- 497 5. The World Bank. World Development Indicators [Internet]. Washington, DC: The World  
498 Bank; 2017 [cited 2017 Oct 5]. Available from:  
499 <http://databank.worldbank.org/data/reports.aspx?source=world-development-indicators>
- 500 6. Jacobs D. Low public expenditures on social welfare : do East Asian countries have a secret ?  
501 *Int J Soc Welf.* 2000;9(1990):2–16.
- 502 7. van Doorslaer E, O'Donnell O, Rannan-Eliya RP, Somanathan A, Adhikari SR, Garg CC, et  
503 al. Effect of payments for health care on poverty estimates in 11 countries in Asia: an analysis  
504 of household survey data. *Lancet.* 2006;368(9544):1357–64.
- 505 8. WHO. Intercountry Cooperation : Cross-border Control of Priority Communicable Diseases.  
506 New Delhi; 2004.
- 507 9. Chisholm D, Evans DB. Improving health system efficiency as a means of moving towards  
508 universal coverage. World Health Organization. Geneva; 2010.
- 509 10. Schwartz WB, Mendelson DN. Eliminating waste and inefficiency can do little to contain  
510 costs. *Health Aff.* 1994;13(1):224–38.
- 511 11. Smith PC. Measuring health system performance. *Eur J Heal Econ.* 2002;3(3):145–8.
- 512 12. European Commission's DG for Employment SA& I. Employment, Social Affairs &  
513 Inclusion - European Commission. 2017.
- 514 13. João Medeiros and Christoph Schwierz. Efficiency estimates of health care systems in the EU.  
515 Vol. 3187. 2015.
- 516 14. Papanicolas I, Smith PC. Health System Performance Comparison: An Agenda for Policy,  
517 Information and Research. 1st ed. European Observatory on Health Systems and Policies. New  
518 York: Open University Press; 2013. 1-417 p.
- 519 15. Chattopadhyay S, Ray SC. Technical, scale, and size efficiency in nursing home care: a  
520 nonparametric analysis of Connecticut homes. *Health Econ.* 1996;5(4):363–73.
- 521 16. Shroff HE, Gullede TR, Haynes KE, O'Neill MK. Siting efficiency of long-term health care  
522 facilities. *Socioecon Plann Sci.* 1998;32(1):25–43.
- 523 17. Hollingsworth B, Parkin D. The efficiency of the delivery of neonatal care in the UK. *J Public  
524 Health (Bangkok).* 2001 Mar 1;23(1):47–50.
- 525 18. Giuffrida A, Gravelle H. Measuring performance in primary care: econometric analysis and  
526 DEA. *Appl Econ.* 2001 Feb 1;33(2):163–75.
- 527 19. Chang H. Determinants of Hospital Efficiency: the Case of Central Government-owned  
528 Hospitals in Taiwan. *Omega [Internet].* 1998;26(2):307–17. Available from:  
529 <http://www.sciencedirect.com/science/article/pii/S0305048398000140>
- 530 20. Wan TTH, Hsu N, Feng R, Ma A, Pan S, Chou M. Technical efficiency of nursing units in a  
531 tertiary care hospital in Taiwan. *J Med Syst.* 2002 Feb;26(1):21–7.



- 1  
2  
3 532 21. Hollingsworth B, Dawson PJ, Maniadakis N. Efficiency measurement of health care: a review  
4 533 of non-parametric methods and applications. *Health Care Manag Sci.* 1999;2(3):161–72.
- 5  
6 534 22. Dimas G, Goula A, Soulis S. Productive performance and its components in Greek public  
7 535 hospitals. *Oper Res.* 2012;12(1):15–27.
- 8  
9 536 23. Zere E, McIntyre D, Addison T. Technical Efficiency and Productivity of Public Sector  
10 537 Hospitals in Three South African Provinces. *South African J Econ.* 2005 Jul;69(2):336–58.
- 11  
12 538 24. Zhang L, Cheng G, Song S, Yuan B, Zhu W, He L, et al. Efficiency performance of China's  
13 539 health care delivery system. *Int J Health Plann Manage.* 2017;32(3):254–63.
- 14  
15 540 25. Allin S, Grignon M, Wang L. The determinants of efficiency in the Canadian health care  
16 541 system. *Heal Econ Policy Law.* 2014;11(1):39–65.
- 17  
18 542 26. Kim Y, Kang M. The Measurement of Health Care System Efficiency : Cross-country  
19 543 Comparison by Geographical Region. 2014;29(1):21–44.
- 20  
21 544 27. Cheng Z, Tao H, Cai M, Lin H, Lin X, Shu Q, et al. Technical efficiency and productivity of  
22 545 Chinese county hospitals: an exploratory study in Henan province, China. *BMJ Open.*  
23 546 2015;5(9):e007267.
- 24  
25 547 28. Jat TR, Sebastian MS. Technical efficiency of public district hospitals in Madhya Pradesh,  
26 548 India: a data envelopment analysis. *Glob Health Action.* 2013 Jan;6(25):21742.
- 27  
28 549 29. Hussey PS, De Vries H, Romley J, Wang MC, Chen SS, Shekelle PG, et al. A systematic  
29 550 review of health care efficiency measures: Health care efficiency. *Health Serv Res.*  
30 551 2009;44(3):784–805.
- 31  
32 552 30. WHO, Organization WH. *Health in Asia and the Pacific.* WHO, editor. New Delhi: WHO;  
33 553 2008. 561 p.
- 34  
35 554 31. WHO. *Global Health Expenditure Database* [Internet]. World Health Organization. 2017.  
36 555 Available from: <http://apps.who.int/nha/database>
- 37  
38 556 32. United Nation. *United Nations Statistics Division- Standard Country and Area Codes*  
39 557 *Classifications* [Internet]. United Nation. 2016 [cited 2016 Dec 12]. Available from:  
40 558 <https://unstats.un.org/unsd/methodology/m49/>
- 41  
42 559 33. Anderson GF, Hurst J, Hussey PS, Jee-Hughes M. Health spending and outcomes: trends in  
43 560 OECD countries, 1960-1998. *Health Aff (Millwood).* 2000;19(3):150–7.
- 44  
45 561 34. Fare R, Grosskopf S, Lindgren B, Poullier JP. Productivity growth in health-care delivery.  
46 562 *Med Care.* 1997 Apr;35(4):354–66.
- 47  
48 563 35. Grubaugh SG, Santerre RE. Comparing the Performance of Health Care Systems: An  
49 564 Alternative Approach. *South Econ J.* 1994;60(4):1030–42.
- 50  
51 565 36. Morris S, Devlin N, Parkin D, Spencer A. *Economic Analysis in Health Care.* 2nd ed.  
52 566 Chichester: John Wiley & Sons, Ltd; 2012. 292 p.
- 53  
54 567 37. Kirigia JM, Sambo LG, Renner A, Alemu W, Seasa S, Bah Y. Technical efficiency of primary  
55 568 health units in Kailahun and Kenema districts of Sierra Leone. *Int Arch Med.* 2011;4(1):15.
- 56  
57 569 38. Wranik D. Healthcare policy tools as determinants of health-system efficiency: evidence from  
58 570 the OECD. *Heal Econ Policy Law.* 2012;7(02):197–226.
- 59  
60 571 39. Retzlaff-Roberts D, Chang CF, Rubin RM. Technical efficiency in the use of health care  
572 572 resources: A comparison of OECD countries. *Health Policy (New York).* 2004;69(1):55–72.
- 573  
574 40. Spinks J, Hollingsworth B. Cross-country comparisons of technical efficiency of health  
575 574 production: a demonstration of pitfalls. *Appl Econ.* 2009;41(4):417–27.
- 576  
577 41. Charnes A, Cooper WW, Rhodes E. Measuring the efficiency of decision making units. *Eur J*  
578 576 *Oper Res.* 1978;2(6):429–44.
- 579  
60 577 42. Banker RD, Charnes A, Cooper WW. Some Models for Estimating Technical and Scale



- 1  
2  
3 578 Inefficiencies in Data Envelopment Analysis. *Manage Sci.* 1984 Sep;30(9):1078–92.  
4  
5 579 43. Achoki T, Hovels A, Masiye F, Lesego A, Leufkens H, Kinfu Y. Technical and scale  
6 580 efficiency in the delivery of child health services in Zambia: Results from data envelopment  
7 581 analysis. *BMJ Open.* 2017;7(1):1–12.  
8 582 44. WHO. The world health report: health systems financing: the path to universal coverage.  
9 583 Geneva: World Health Organisation; 2010.  
10  
11 584 45. Cooper W, Seiford L, Tone K. Data envelopment analysis a comprehensive text with models,  
12 585 applications, references and Dea-Solver software. New York: Springer; 2007.  
13 586 46. Masiye F. Investigating health system performance: an application of data envelopment  
14 587 analysis to Zambian hospitals. *BMC Health Serv Res.* 2007;7:58.  
15  
16 588 47. Kirigia JM, Emrouznejad A, Gama Vaz R, Bastiene H, Padayachy J. A comparative  
17 589 assessment of performance and productivity of health centres in Seychelles. *Int J Product*  
18 590 *Perform Manag.* 2007;57(1):72–92.  
19 591 48. Osei D, d’Almeida S, George MO, Kirigia JM, Mensah AO, Kainyu LH. Technical efficiency  
20 592 of public district hospitals and health centres in Ghana: a pilot study. *Cost Eff Resour Alloc.*  
21 593 2005;3:9.  
22  
23 594 49. Ramalho EA, Ramalho JJS, Henriques PD. Fractional regression models for second stage  
24 595 DEA efficiency analyses. *J Product Anal.* 2010;34(3):239–55.  
25 596 50. McDonald J. Using least squares and tobit in second stage DEA efficiency analyses. *Eur J*  
26 597 *Oper Res.* 2009;197(2):792–8.  
27  
28 598 51. Simar L, Wilson PW. Estimation and inference in two-stage, semi-parametric models of  
29 599 production processes. *J Econom.* 2007;136(1):31–64.  
30 600 52. Afonso A, St. Aubyn M. Assessing health efficiency across countries with a two-step and  
31 601 bootstrap analysis. *Appl Econ Lett.* 2011;18(13–15):1427–30.  
32  
33 602 53. Zere E. Hospital Efficiency in Sub-Saharan Africa Evidence. Helsinki; 2000. Report No.: 187.  
34 603 54. Newhouse JP, Friedlander LJ. The relationship between medical resources and measures of  
35 604 health: some additional evidence. *J Hum Resour.* 1980;15(2):200–18.  
36  
37 605 55. Starfield B. Health Services Research: A Working Model. *N Engl J Med.* 1973 Jul  
38 606 19;289(3):132–6.  
39  
40 607 56. Johansson SE, Sundquist J. Change in lifestyle factors and their influence on health status and  
41 608 all-cause mortality. *Int J Epidemiol.* 1999;28(Cvd):1073–80.  
42 609 57. Or Z. Determinants of health outcomes in industrialised countries: A pooled, cross-country,  
43 610 time-series analysis. Vol. 30, *OECD Economic Studies.* 2000. 53-77 p.  
44  
45 611 58. Badunenko O, Tauchmann H. SIMARWILSON: Stata module to perform Simar & Wilson  
46 612 (2007) efficiency analysis [Internet]. Boston College Department of Economics; 2016.  
47 613 (Statistical Software Components). Available from:  
48 614 <https://ideas.repec.org/c/boc/bocode/s458156.html>  
49 615 59. McCallion G, Colin Glass J, Jackson R, Kerr CA, McKillop DG. Investigating productivity  
50 616 change and hospital size: a nonparametric frontier approach. *Appl Econ.* 2000;32(2):161–74.  
51  
52 617 60. Alirezaee MR, Howland M. Sampling Size and Efficiency Bias. 1998;2(1):51–65.  
53 618 61. Hollingsworth B, Peacock SJ. Efficiency Measurement in Health and Health Care. 1st ed. New  
54 619 York: Routledge; 2008.  
55  
56 620 62. Golany B, Roll Y. An application procedure for DEA. *Omega.* 1989;17(3):237–50.  
57 621 63. Smith P. Model misspecification in data envelopment analysis. *Ann Oper Res.* 1997;73:233–  
58 622 52.  
59  
60 623 64. Grosskopf S, Self S, Zaim O. Estimating the efficiency of the system of healthcare financing

- 624 in achieving better health. *Appl Econ* [Internet]. 2006;38(13):1477–88. Available from:  
625 <http://www.tandfonline.com/doi/abs/10.1080/00036840500424798>
- 626 65. European Union. Comparative efficiency of health systems , corrected for selected lifestyle  
627 factors Final report. European Commision. 2014.
- 628 66. Joumard I, André C, Nicq C. Health care systems: Efficiency and institutions. 2010;1–132.
- 629 67. Koblinsky M, Anwar I, Mridha MK, Chowdhury ME, Botlero R. Reducing maternal mortality  
630 and improving maternal health: Bangladesh and MDG 5. *J Heal Popul Nutr*. 2008;26(3):280–  
631 94.
- 632 68. Balabanova D, Mills A, Conteh L, Akkazieva B, Banteyerga H, Dash U, et al. Good health at  
633 low cost 25 years on: Lessons for the future of health systems strengthening. *Lancet*.  
634 2013;381(9883):2118–33.
- 635 69. Colditz GA, Atwood KA, Emmons K, Monson RR, Willett WC, Trichopoulos D, et al.  
636 Harvard report on cancer prevention volume 4: Harvard Cancer Risk Index. *Cancer Causes  
637 Control*. 2000;11(6):477–88.
- 638 70. Laaksonen M, McAlister AL, Laatikainen T, Drygas W, Morava E, Nüssel E, et al. Do health  
639 behaviour and psychosocial risk factors explain the European East-Westgap in health status?  
640 *Eur J Public Health*. 2001;11(1):65–73.
- 641 71. Hart CL, Smith GD, Blane D. Inequalities in mortality by social class measured at 3 stages of  
642 the lifecourse. *Am J Public Health*. 1998;88(3):471–4.
- 643 72. Cohen DA, Mason K, Bedimo A, Scribner R, Basolo V, Farley TA. Neighborhood physical  
644 conditions and health. *Am J Public Health*. 2003;93(3):467–71.
- 645 73. Jerrett M, Eyles J, Cole D. Socioeconomic and environmental covariates of premature  
646 mortality in Ontario. *Soc Sci Med*. 1998;47(1):33–49.

## 648 Tables

649 Table 2. Technical and scale efficiency scores of the health systems in Asian countries

| Country name      | CRS Technical efficiency | VRS Technical efficiency | Scale efficiency | Returns to scale |
|-------------------|--------------------------|--------------------------|------------------|------------------|
| Afghanistan       | 0.724                    | 0.812                    | 0.891            | 1                |
| Armenia           | 0.769                    | 0.946                    | 0.813            | -1               |
| Azerbaijan        | 0.660                    | 0.902                    | 0.732            | -1               |
| Bahrain           | 0.714                    | 0.910                    | 0.784            | -1               |
| Bangladesh        | 1.000                    | 1.000                    | 1.000            | 0                |
| Bhutan            | 0.775                    | 0.903                    | 0.858            | 1                |
| Brunei Darussalam | 0.708                    | 0.920                    | 0.769            | -1               |
| Cambodia          | 0.805                    | 0.916                    | 0.879            | 1                |
| China             | 0.806                    | 0.975                    | 0.826            | -1               |
| Cyprus            | 1.000                    | 1.000                    | 1.000            | 1                |
| Georgia           | 0.751                    | 0.923                    | 0.813            | -1               |
| India             | 0.778                    | 0.892                    | 0.872            | 1                |
| Indonesia         | 0.746                    | 0.904                    | 0.826            | 1                |
| Iran              | 0.678                    | 0.900                    | 0.754            | -1               |
| Iraq              | 0.683                    | 0.850                    | 0.803            | 1                |
| Israel            | 0.874                    | 0.967                    | 0.904            | -1               |
| Japan             | 1.000                    | 1.000                    | 1.000            | 0                |
| Jordan            | 0.743                    | 0.943                    | 0.789            | -1               |

|    |                      |                      |                      |                     |    |
|----|----------------------|----------------------|----------------------|---------------------|----|
| 1  |                      |                      |                      |                     |    |
| 2  |                      |                      |                      |                     |    |
| 3  | Kazakhstan           | 0.695                | 0.882                | 0.788               | 1  |
| 4  | South Korea          | 0.886                | 0.972                | 0.911               | -1 |
| 5  | Kuwait               | 0.674                | 0.885                | 0.762               | -1 |
| 6  | Kyrgyz Republic      | 0.806                | 0.941                | 0.856               | 1  |
| 7  | Laos                 | 0.818                | 0.889                | 0.920               | 1  |
| 8  | Lebanon              | 0.746                | 0.910                | 0.820               | 1  |
| 9  | Malaysia             | 0.778                | 0.927                | 0.839               | 1  |
| 10 | Maldives             | 0.730                | 0.944                | 0.773               | -1 |
| 11 | Mongolia             | 0.737                | 0.896                | 0.823               | 1  |
| 12 | Myanmar              | 0.743                | 0.872                | 0.852               | 1  |
| 13 | Nepal                | 0.861                | 0.932                | 0.924               | 1  |
| 14 | Oman                 | 0.692                | 0.896                | 0.772               | -1 |
| 15 | Pakistan             | 0.827                | 0.889                | 0.930               | 1  |
| 16 | Philippines          | 0.779                | 0.916                | 0.850               | 1  |
| 17 | Qatar                | 0.677                | 0.903                | 0.749               | -1 |
| 18 | Saudi Arabia         | 0.624                | 0.871                | 0.716               | -1 |
| 19 | Singapore            | 1.000                | 1.000                | 1.000               | 0  |
| 20 | Sri Lanka            | 0.904                | 0.985                | 0.917               | -1 |
| 21 | Syria                | 0.818                | 0.848                | 0.964               | 1  |
| 22 | Tajikistan           | 0.856                | 0.964                | 0.888               | -1 |
| 23 | Thailand             | 0.791                | 0.956                | 0.828               | -1 |
| 24 | Timor-Leste          | 0.823                | 0.903                | 0.912               | 1  |
| 25 | Turkey               | 0.710                | 0.916                | 0.776               | -1 |
| 26 | Turkmenistan         | 0.639                | 0.859                | 0.743               | 1  |
| 27 | United Arab Emirates | 0.691                | 0.889                | 0.777               | 1  |
| 28 | Uzbekistan           | 0.784                | 0.947                | 0.828               | -1 |
| 29 | Vietnam              | 0.845                | 0.996                | 0.849               | -1 |
| 30 | Yemen                | 0.727                | 0.826                | 0.881               | 1  |
| 31 | <b>Mean (95% CI)</b> | <b>0.780</b>         | <b>0.919</b>         | <b>0.847</b>        |    |
| 32 |                      | <b>(0.752-0.808)</b> | <b>(0.905-0.933)</b> | <b>(0.824-0.87)</b> | -  |
| 33 | <b>Median</b>        | 0.772                | 0.913                | 0.834               | -  |
| 34 | <b>Minimum</b>       | 0.624                | 0.812                | 0.716               | -  |
| 35 | <b>Maximum</b>       | 1                    | 1                    | 1                   | -  |

650

651 Table 3. Result from Tobit regression and smooth bootstrap analysis

| Variable                                                                 | Tobit regression            |         | Bootstrap analysis         |         |
|--------------------------------------------------------------------------|-----------------------------|---------|----------------------------|---------|
|                                                                          | Co-efficient<br>(95% CI)    | P-value | Co-efficient<br>(95% CI)   | P-value |
| <b>Physician density (per 1,000 population)</b>                          |                             |         |                            |         |
| 1-2 physician<br>(Ref=Fewer than 1 physician)                            | -0.0041<br>(-0.0437,0.0355) | 0.8360  | 0.0069<br>(-0.02,0.0346)   | 0.6220  |
| More than 2 physician<br>(Ref=Fewer than 1 physician)                    | 0.0001<br>(-0.0495,0.0495)  | 0.9990  | -0.0086<br>(-0.0424,0.026) | 0.6310  |
| <b>Bed density (per 1,000 population)</b>                                |                             |         |                            |         |
| More than 1 and less than or equal to<br>3 beds (Ref= Fewer than 1 beds) | -0.025<br>(-0.0698,0.0198)  | 0.2660  | 0.032<br>(-0.0003,0.0639)  | 0.0470  |
| More than 3 and less or equal to 5 beds<br>(Ref= Fewer than 1 beds)      | -0.0469<br>(-0.0964,0.0026) | 0.0620  | 0.0519<br>(0.016,0.0851)   | 0.0040  |

|                                                                 |                                                            |        |                             |        |
|-----------------------------------------------------------------|------------------------------------------------------------|--------|-----------------------------|--------|
| More than 5 beds<br>(Ref= Fewer than 1 beds)                    | -0.0524<br>(-0.1079,0.0032)                                | 0.0640 | 0.0467<br>(0.0058,0.0874)   | 0.0240 |
| <b>Primary completion rate, total (% of relevant age group)</b> | -0.0015<br>(-0.0028--0.0002)                               | 0.0260 | 0.0013<br>(0.0005,0.0022)   | 0.0020 |
| <b>Smoking prevalence, males (% of adults)</b>                  | 0.0000<br>(-0.0015-0.0016)                                 | 0.9930 | 0.0002<br>(-0.0008,0.0012)  | 0.7350 |
| <b>Income group</b>                                             |                                                            |        |                             |        |
| Upper-middle-income<br>(Ref=Low and Lower middle income)        | 0.0088<br>(-0.0296-0.0472)                                 | 0.6450 | -0.0067<br>(-0.0357,0.0201) | 0.6370 |
| High-income<br>(Ref=Low and Lower middle income)                | 0.0087<br>(-0.0403-0.0577)                                 | 0.7200 | -0.0264<br>(-0.0619,0.0094) | 0.1300 |
| <b>Population live per square meter of land</b>                 |                                                            |        |                             |        |
| >100 to <=200<br>(Ref=less than or equal to 100)                | -0.0385<br>(-0.0775-0.0005)                                | 0.0010 | 0.0212<br>(-0.004,0.0493)   | 0.1150 |
| More than 200<br>(Ref=less than or equal to 100)                | -0.0654<br>(-0.1009--0.0299)                               | 0.0000 | 0.0435<br>(0.0173,0.0684)   | 0.0010 |
| Constant                                                        | 0.2859<br>(0.1534-0.4185)                                  | 0.0000 | 0.7368<br>(0.6431,0.8262)   | 0.0000 |
| Sigma                                                           | 0.0444<br>(0.0343-0.0545)                                  | -      | 0.0304<br>(0.0197,0.0324)   | -      |
| Considering inefficiency <=0.                                   |                                                            |        |                             |        |
| Observations summary                                            | left-censored (4)<br>Uncensored (42)<br>right-censored (0) |        |                             |        |
| Number of observation                                           | 46                                                         |        | 42                          |        |
| Log likelihood/number of efficient DMUs                         | 66.5                                                       |        | 4                           |        |
| degrees of freedom/Number of bootstrap                          |                                                            |        |                             |        |
| reps                                                            | 11                                                         |        | 1000                        |        |
| Prob. > chi2                                                    | 0.000                                                      |        | 0.000                       |        |

652

653 Table 4. Mean efficiency scores according to income level of Asian countries

| Income groups                | VRS technical efficiency |               | Percentage of output can be improved in VRS technical efficiency |
|------------------------------|--------------------------|---------------|------------------------------------------------------------------|
|                              | Mean                     | 95% CI        |                                                                  |
| Low- and lower middle-income | 0.913                    | (0.891-0.935) | 8.7%                                                             |
| Upper middle-income          | 0.914                    | (0.894-0.935) | 8.6%                                                             |
| High -income                 | 0.934                    | (0.905-0.963) | 6.6%                                                             |

654

655

656 **Figures**

657 Figure 1. Association across health systems input and outcome

658 Figure 2. Results from the sensitivity analysis of efficiency scores

659

1  
2  
3  
4  
5  
6  
7  
8  
9  
10  
11  
12  
13  
14  
15  
16  
17  
18  
19  
20  
21  
22  
23  
24  
25  
26  
27  
28  
29  
30  
31  
32  
33  
34  
35  
36  
37  
38  
39  
40  
41  
42  
43  
44  
45  
46  
47  
48  
49  
50  
51  
52  
53  
54  
55  
56  
57  
58  
59  
60

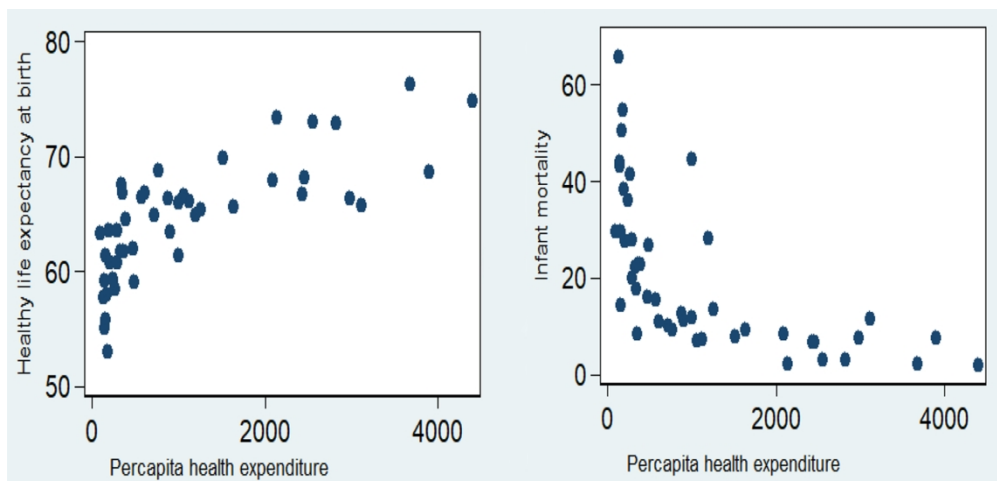

Figure 1. Association across health systems input and outcome

189x91mm (300 x 300 DPI)

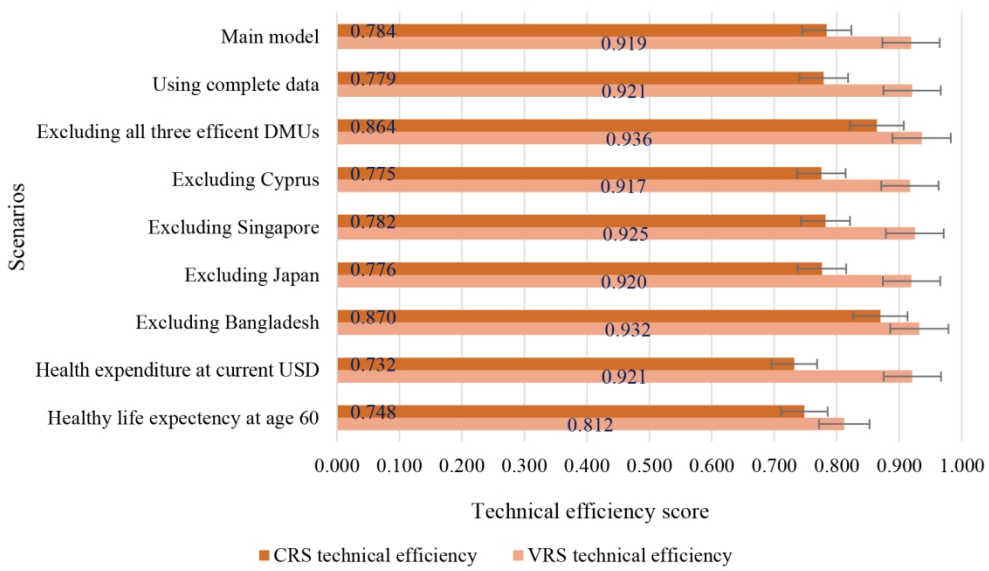

Figure 2. Results from the sensitivity analysis of efficiency scores

155x91mm (300 x 300 DPI)

Supplementary Table 1. Correlation among technical efficiency, input, and output variables

| Variables                     | CRS technical efficiency | VRS technical efficiency | Per capita health expenditure | Healthy life expectancy at birth | Infant mortality |
|-------------------------------|--------------------------|--------------------------|-------------------------------|----------------------------------|------------------|
| CRS technical efficiency      | 1.000                    |                          |                               |                                  |                  |
| VRS technical efficiency      | 0.739                    | 1.000                    |                               |                                  |                  |
| Per capita health expenditure | 0.089                    | 0.277                    | 1.000                         |                                  |                  |
| Healthy life expectancy       | 0.343                    | 0.755                    | 0.774                         | 1.000                            |                  |
| Infant mortality              | -0.092                   | -0.485                   | -0.651                        | -0.811                           | 1.000            |

Supplementary Figure 1. Distribution of the efficiency scores of Asian health systems

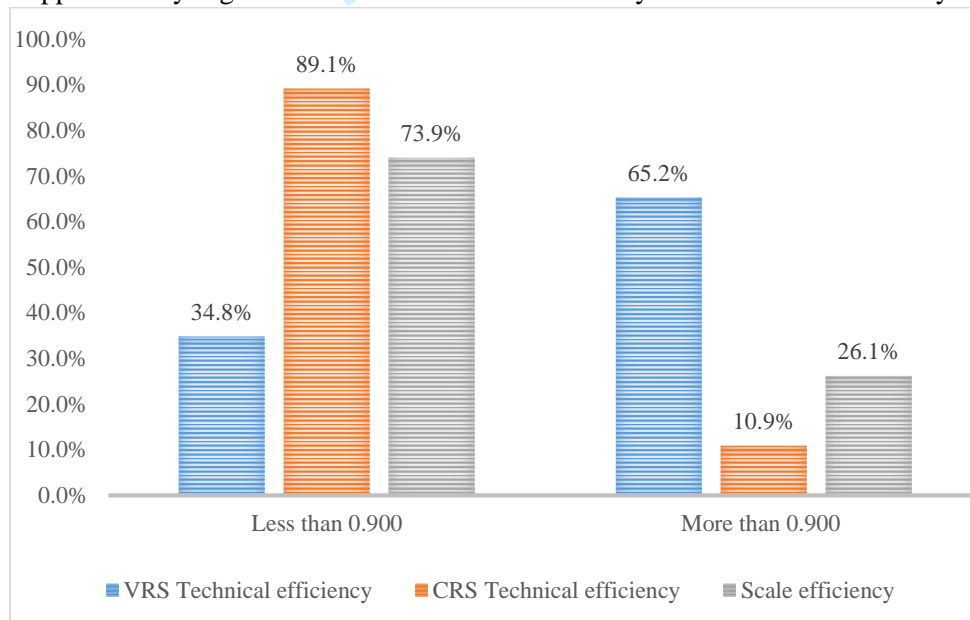



1  
2  
3  
4  
5  
6  
7  
8  
9  
10  
11  
12  
13  
14  
15  
16  
17  
18  
19  
20  
21  
22  
23  
24  
25  
26  
27  
28  
29  
30  
31  
32  
33  
34  
35  
36  
37  
38  
39  
40  
41  
42  
43  
44  
45  
46  
47  
48  
49  
50  
51  
52  
53  
54  
55  
56  
57  
58  
59  
60STROBE Statement—Checklist of items that should be included in reports of *cross-sectional studies*

|                              | Page no | Item No | Recommendation                                                                                                                                                                                               |
|------------------------------|---------|---------|--------------------------------------------------------------------------------------------------------------------------------------------------------------------------------------------------------------|
| Title and abstract           | 0       | 1       | (a) Indicate the study's design with a commonly used term in the title or the abstract                                                                                                                       |
|                              | 1       |         | (b) Provide in the abstract an informative and balanced summary of what was done and what was found                                                                                                          |
| <b>Introduction</b>          |         |         |                                                                                                                                                                                                              |
| Background/rationale         | 2       | 2       | Explain the scientific background and rationale for the investigation being reported                                                                                                                         |
| Objectives                   | 4       | 3       | State specific objectives, including any prespecified hypotheses                                                                                                                                             |
| <b>Methods</b>               |         |         |                                                                                                                                                                                                              |
| Study design                 | 4       | 4       | Present key elements of study design early in the paper                                                                                                                                                      |
| Setting                      | 4       | 5       | Describe the setting, locations, and relevant dates, including periods of recruitment, exposure, follow-up, and data collection                                                                              |
| Participants                 | "n/a"   | 6       | (a) Give the eligibility criteria, and the sources and methods of selection of participants                                                                                                                  |
| Variables                    | 5       | 7       | Clearly define all outcomes, exposures, predictors, potential confounders, and effect modifiers. Give diagnostic criteria, if applicable                                                                     |
| Data sources/<br>measurement | 5       | 8*      | For each variable of interest, give sources of data and details of methods of assessment (measurement). Describe comparability of assessment methods if there is more than one group                         |
| Bias                         | "n/a"   | 9       | Describe any efforts to address potential sources of bias                                                                                                                                                    |
| Study size                   | "n/a"   | 10      | Explain how the study size was arrived at                                                                                                                                                                    |
| Quantitative variables       | "6"     | 11      | Explain how quantitative variables were handled in the analyses. If applicable, describe which groupings were chosen and why                                                                                 |
| Statistical methods          | 6       | 12      | (a) Describe all statistical methods, including those used to control for confounding                                                                                                                        |
|                              | 8       |         | (b) Describe any methods used to examine subgroups and interactions                                                                                                                                          |
|                              | 4       |         | (c) Explain how missing data were addressed                                                                                                                                                                  |
|                              | "na"    |         | (d) If applicable, describe analytical methods taking account of sampling strategy                                                                                                                           |
|                              | 10      |         | (e) Describe any sensitivity analyses                                                                                                                                                                        |
| <b>Results</b>               |         |         |                                                                                                                                                                                                              |
| Participants                 | "na"    | 13*     | (a) Report numbers of individuals at each stage of study—eg numbers potentially eligible, examined for eligibility, confirmed eligible, included in the study, completing follow-up, and analysed            |
|                              | "na"    |         | (b) Give reasons for non-participation at each stage                                                                                                                                                         |
|                              | "na"    |         | (c) Consider use of a flow diagram                                                                                                                                                                           |
| Descriptive data             | 11      | 14*     | (a) Give characteristics of study participants (eg demographic, clinical, social) and information on exposures and potential confounders                                                                     |
|                              | 4       |         | (b) Indicate number of participants with missing data for each variable of interest                                                                                                                          |
| Outcome data                 | "na"    | 15*     | Report numbers of outcome events or summary measures                                                                                                                                                         |
| Main results                 | 12      | 16      | (a) Give unadjusted estimates and, if applicable, confounder-adjusted estimates and their precision (eg, 95% confidence interval). Make clear which confounders were adjusted for and why they were included |



|                  |                          |    |                                                                                                                                                                            |
|------------------|--------------------------|----|----------------------------------------------------------------------------------------------------------------------------------------------------------------------------|
|                  | 13                       |    | (b) Report category boundaries when continuous variables were categorized                                                                                                  |
|                  | “n/a”                    |    | (c) If relevant, consider translating estimates of relative risk into absolute risk for a meaningful time period                                                           |
| Other analyses   | 13                       | 17 | Report other analyses done—eg analyses of subgroups and interactions, and sensitivity analyses                                                                             |
|                  | <b>Discussion</b>        |    |                                                                                                                                                                            |
| Key results      | 14                       | 18 | Summarise key results with reference to study objectives                                                                                                                   |
| Limitations      | 16                       | 19 | Discuss limitations of the study, taking into account sources of potential bias or imprecision. Discuss both direction and magnitude of any potential bias                 |
| Interpretation   | 14,15                    | 20 | Give a cautious overall interpretation of results considering objectives, limitations, multiplicity of analyses, results from similar studies, and other relevant evidence |
| Generalisability | 15                       | 21 | Discuss the generalisability (external validity) of the study results                                                                                                      |
|                  | <b>Other information</b> |    |                                                                                                                                                                            |
| Funding          | 18                       | 22 | Give the source of funding and the role of the funders for the present study and, if applicable, for the original study on which the present article is based              |

\*Give information separately for exposed and unexposed groups.

**Note:** An Explanation and Elaboration article discusses each checklist item and gives methodological background and published examples of transparent reporting. The STROBE checklist is best used in conjunction with this article (freely available on the Web sites of PLoS Medicine at <http://www.plosmedicine.org/>, Annals of Internal Medicine at <http://www.annals.org/>, and Epidemiology at <http://www.epidem.com/>). Information on the STROBE Initiative is available at [www.strobe-statement.org](http://www.strobe-statement.org).
