# Supplementary material for: Measuring the efficiency of health systems in Asia: a data envelopment analysis
Source: PubMed Central journal article supplement — BMJ Open. 2019 Mar 27;9(3):e022155. doi: 10.1136/bmjopen-2018-022155 (PMC6475137; doi:10.1136/bmjopen-2018-022155), 2019-03-27

Supplementary Table 1. Correlation among technical efficiency, input, and output variables

| Variables                     | CRS technical efficiency | VRS technical efficiency | Per capita health expenditure | Healthy life expectancy at birth | Infant mortality |
|-------------------------------|--------------------------|--------------------------|-------------------------------|----------------------------------|------------------|
| CRS technical efficiency      | 1.000                    |                          |                               |                                  |                  |
| VRS technical efficiency      | 0.739                    | 1.000                    |                               |                                  |                  |
| Per capita health expenditure | 0.089                    | 0.277                    | 1.000                         |                                  |                  |
| Healthy life expectancy       | 0.343                    | 0.755                    | 0.774                         | 1.000                            |                  |
| Infant mortality              | -0.092                   | -0.485                   | -0.651                        | -0.811                           | 1.000            |

Supplementary Figure 1. Distribution of the efficiency scores of Asian health systems

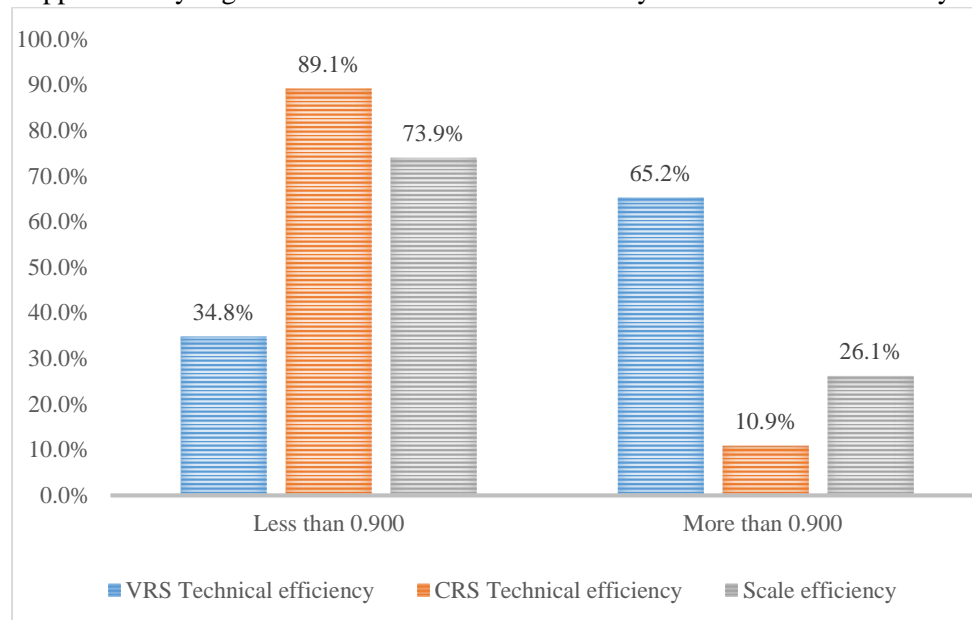

Supplement: bmjopen-2018-022155supp001.pdf [file bmjopen-2018-022155supp001.pdf]
